# Supplementary material for: Facile synthesis of carbohydrate-integrated isoxazolines through tandem [4+1] cycloaddition and rearrangement of 2-nitroglycals
Source: Royal Society of Chemistry journal article supplement (doi:10.1039/c1cc12327k), 2011-01-01

# Facile Synthesis of Carbohydrate-Integrated Isoxazolines through tandem [4 + 1] cycloaddition and rearrangement of 2 nitroglycals

Shuting Cai, Shaohua Xiang, Jing Zeng, Bala Kishan Gorityala and Xue-Wei Liu\*

Division of Chemistry and Biological Chemistry, School of Physical and Mathematical Sciences,  
Nanyang Technological University, Singapore 637371

E-mail: [xuewei@ntu.edu.sg](mailto:xuewei@ntu.edu.sg)

## Supporting Information

### Table of Contents

|                                                                                                                      |        |
|----------------------------------------------------------------------------------------------------------------------|--------|
| General experimental details.....                                                                                    | 2      |
| Preparation and characterization of starting material, 3,4,6-tri- <i>O</i> -benzyl-2-nitroglycals ( <b>1</b> ) ..... | 3      |
| General synthetic procedure for carbohydrate-integrated isoxazolines ( <b>3</b> ).....                               | 4      |
| Characterization of the carbohydrate-integrated isoxazolines ( <b>3a-3l</b> ) .....                                  | 5-9    |
| X-Ray Data.....                                                                                                      | 10 -11 |
| Gaussian Calculations .....                                                                                          | 12-21  |
| References .....                                                                                                     | 22     |
| Spectral Data.....                                                                                                   | 23-46  |

## General experimental details

All reactions were conducted under an atmosphere of nitrogen, unless otherwise indicated. Anhydrous solvents were transferred *via* oven-dried syringe. Flasks were flame-dried and cooled under a stream of nitrogen. All reagents and solvents were obtained from commercial suppliers (Sigma-Aldrich, Fluka and Alfa Aesar) and used without further purification unless otherwise stated. Evaporation of organic solutions was achieved by rotary evaporation with a water bath temperature below 40 °C. Product purification by flash column chromatography was accomplished using silica gel 60 (0.010 - 0.063 mm). Technical grade solvents were used for chromatography and distilled prior to use. Chromatograms were visualized by fluorescence quenching with UV light at 254 nm or by staining using a basic solution of potassium permanganate. Optical rotations were measured in CHCl<sub>3</sub> on a Schmidt + Haensdch polarimeter with a 1 cm cell (*c* given in g/100 mL). IR spectra were recorded using FTIR Restige-21 (Shimadzu) and reported in cm<sup>-1</sup>. High-resolution mass spectra (HRMS) were obtained on a Finnigan/MAT LCQ quadrupole ion trap mass spectrometer, coupled with the TSP4000 HPLC system and the Crystal 310 CE system. Accurate masses are reported for the molecular ion [M+H]<sup>+</sup> or a suitable fragment ion. NMR spectra were recorded at room temperature on a 400 MHz Bruker ACF 400 NMR spectrometer. The residual solvent signals were taken as the reference (7.26 ppm for <sup>1</sup>H NMR spectroscopy and 77.0 ppm for <sup>13</sup>C NMR spectroscopy). Chemical shifts are reported in delta ( $\delta$ ) units, parts per million (ppm) downfield from triethylsilane. Chemical shift ( $\delta$ ) is referred in terms of ppm, coupling constants (*J*) are given in Hz. Following abbreviations classify the multiplicity: s = singlet, d = doublet, t = triplet, q = quartet, m = multiplet or unresolved. X-ray crystallographic data was collected by using a Bruker X8Apex diffractometer with Mo K/ $\alpha$  radiation (graphite monochromator). Compound numbers used in the experimental section correspond to those employed in the main paper.

## Preparation of starting material 3,4,6-tri-*O*-benzyl-2-nitroglycals (**1**)

The starting 3,4,6-tri-*O*-benzyl-2-nitroglycals (**1**) were prepared according to the known procedure.<sup>1</sup> Experimental results obtained were in accordance with the reported reference.

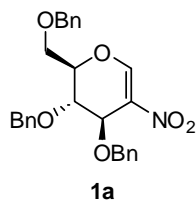

The product was obtained as a pale yellow solid; (1.12 g, 56 % yield); **m.p.** 53-56 °C; **<sup>1</sup>H NMR (400 MHz, CDCl<sub>3</sub>):** δ 8.21 (s, 1H), 7.35-7.22 (m, 15H), 4.68-4.44 (m, 8H), 3.87 (dd,  $J_1 = 3.2$  Hz,  $J_2 = 2.4$  Hz, 1H), 3.72 (dd,  $J_1 = 10.1$  Hz,  $J_2 = 14.2$  Hz, 1H), 3.60 (dd,  $J_1 = 7.1$  Hz,  $J_2 = 14.2$  Hz, 1H); **<sup>13</sup>C NMR (100 MHz, CDCl<sub>3</sub>):** δ 154.7, 137.6, 137.0, 128.9, 128.7, 128.5, 128.4, 128.3, 128.1, 128.0, 127.9, 78.6, 73.6, 73.2, 72.0, 71.4, 68.0, 67.7; **IR (KBr):** 3007, 2918, 2870, 1719, 1599, 1557, 1362, 1096 cm<sup>-1</sup>; **HRMS (ESI):**  $m/z$  calcd for C<sub>27</sub>H<sub>28</sub>NO<sub>6</sub> [M+H]<sup>+</sup>, 462.1917, found: 462.1916.

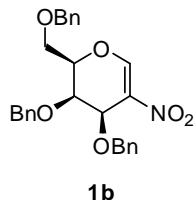

The product was obtained as a yellow solid; (1.10 g, 57 % yield); **<sup>1</sup>H NMR (400 MHz, CDCl<sub>3</sub>):** δ 8.10 (s, 1H), 7.41-7.26 (m, 15H), 4.91-4.46 (m, 8H), 3.97-3.91 (m, 3H); **<sup>13</sup>C NMR (100 MHz, CDCl<sub>3</sub>):** δ 154.6, 138.1, 137.7, 136.9, 131.6, 128.7, 128.5, 128.4, 128.3, 128.0, 127.9, 127.8, 127.7, 78.1, 77.4, 77.1, 76.8, 75.0, 73.5, 73.1, 72.2, 67.6; **IR (KBr):** 3013, 2922, 2870, 1748, 1636, 1558, 1504, 1344, 1323, 1202, 1094 cm<sup>-1</sup>; **HRMS (ESI):**  $m/z$  calcd for C<sub>27</sub>H<sub>28</sub>NO<sub>6</sub> [M+H]<sup>+</sup>, 462.1920, found: 462.1917.

### General synthetic procedure for carbohydrate-integrated isoxazolines (3)

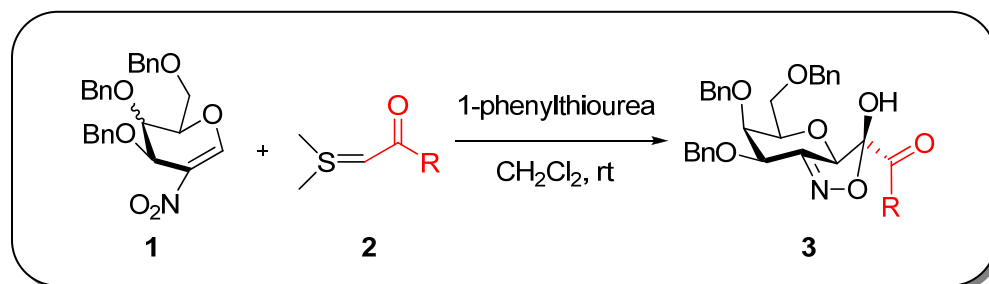

To a solution of 3,4,6-tri-*O*-benzyl-2-nitrogalactal **1a** (50 mg, 0.11 mmol) and 1-phenylthiourea (2 mg, 0.01 mmol) in  $\text{CH}_2\text{Cl}_2$  (2 mL) was added sulphur ylide **2a** (29 mg, 0.17 mmol). The reaction mixture was stirred at rt for 5.5 h. The resulting mixture was extracted with ether ( $2 \times 50$  mL), washed with 10%  $\text{NaHCO}_3$  ( $2 \times 50$  mL) and brine ( $2 \times 50$  mL). The organic layers were dried over  $\text{Na}_2\text{SO}_4$ , filtered and concentrated under reduced pressure to yield the crude residue as a dark yellow oil. The crude residue was then purified by flash column chromatography on silica gel (20% EtOAc in hexanes) to afford compound **3a** (54 mg, 0.09 mmol, 85% yield of diastereomer mixture) as a colourless oil.

## Characterization of the carbohydrate-integrated isoxazolines (3)

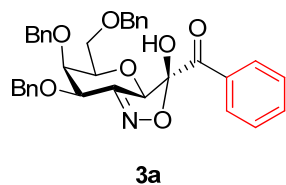

The title compound was prepared according to the general procedure and the compound was obtained as a colourless oil (50 mg, 80% yield of diastereomer mixture, 91% *de*);  $[\alpha]_D^{24}$  -174.0 (*c* 0.02, CHCl<sub>3</sub>); **<sup>1</sup>H NMR (400 MHz, CDCl<sub>3</sub>):**  $\delta$  8.28 (d, *J* = 7.4 Hz, 2H), 7.59 (t, *J* = 7.4 Hz, 1H), 7.47 (t, *J* = 7.4 Hz, 2H), 7.41-7.28 (m, 15H), 5.59 (s, 1H), 5.47 (s, 1H), 5.06 (dd, *J* = 11.9, 3.9 Hz, 2H), 4.69 (d, *J* = 11.9 Hz, 1H), 4.61 (d, *J* = 11.3 Hz, 1H), 4.56-4.55 (m, 1H), 4.42 (dd, *J* = 19.5, 11.9 Hz, 2H), 4.19-4.18 (m, 1H), 3.97 (t, *J* = 6.5 Hz, 1H), 3.59 (d, *J* = 6.5 Hz, 2H); **<sup>13</sup>C NMR (100 MHz, CDCl<sub>3</sub>):**  $\delta$  189.6, 156.1, 137.8, 137.5, 137.2, 133.8, 132.8, 131.0, 128.6, 128.6, 128.5, 128.4(2), 128.3, 128.1, 128.0, 127.9(2), 127.7, 105.9, 81.1, 77.8, 76.6, 75.1, 75.0, 73.6, 72.4, 67.8; **IR (neat)** 3424, 3030, 2922, 2872, 1688, 1645, 1597 cm<sup>-1</sup>; **HRMS (ESI):** *m/z* calcd for C<sub>35</sub>H<sub>33</sub>NO<sub>7</sub> [M+H]<sup>+</sup>, 580.2257, found 580.2335.

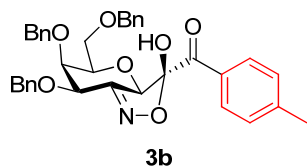

The title compound was prepared according to the general procedure and the compound was obtained as a white solid (50 mg, 78% yield of diastereomer mixture, 92% *de*); **m.p.** 144-145 °C;  $[\alpha]_D^{24}$  -164.7 (*c* 0.2, CHCl<sub>3</sub>); **<sup>1</sup>H NMR (400 MHz, CDCl<sub>3</sub>):**  $\delta$  8.18 (d, *J* = 8.2 Hz, 2H), 7.41-7.25 (m, 17H), 5.59 (s, 1H), 5.38 (s, 1H), 5.06 (dd, *J* = 11.9, 4.6 Hz, 2H), 4.69 (d, *J* = 11.9 Hz, 1H), 4.61 (d, *J* = 11.3 Hz, 1H), 4.56-4.55 (m, 1H), 4.41 (dd, *J* = 19.4, 11.9 Hz, 2H), 4.18-4.17 (m, 1H), 3.96 (t, *J* = 6.5 Hz, 1H), 3.59 (d, *J* = 6.5 Hz, 2H), 2.42 (s, 3H); **<sup>13</sup>C NMR (100 MHz, CDCl<sub>3</sub>):**  $\delta$  189.2, 156.2, 144.8, 137.8, 137.5, 137.2, 131.2, 130.2, 129.1, 128.6, 128.5(2), 128.4, 128.1, 128.0(2), 127.9(2), 127.7, 106.0, 81.2, 77.8, 76.6, 75.1, 75.0, 73.6, 72.4, 67.8, 21.8; **IR (neat)** 3584, 3030, 2920, 2870, 1690, 1607 cm<sup>-1</sup>; **HRMS (ESI):** *m/z* calcd for C<sub>36</sub>H<sub>35</sub>NO<sub>7</sub> [M+H]<sup>+</sup>, 594.2414, found 594.2492.

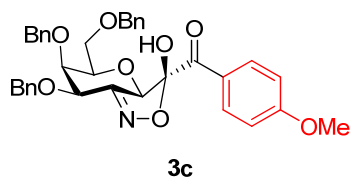

The title compound was prepared according to the general procedure and the compound was obtained as a colourless oil (54 mg, 81% yield of diastereomer mixture, 90% *de*);  $[\alpha]_D^{24}$  -201.8 (*c* 0.1, CHCl<sub>3</sub>); **<sup>1</sup>H NMR (400 MHz, CDCl<sub>3</sub>):**  $\delta$  8.27 (d, *J* = 9.0 Hz,

2H), 7.41-7.25 (m, 15H), 7.14 (d,  $J = 9.0$  Hz, 2H), 5.59 (s, 1H), 5.35 (s, 1H), 5.08-5.04 (m, 2H), 4.69 (d,  $J = 11.9$  Hz, 1H), 4.61 (d,  $J = 11.3$  Hz, 1H), 4.55-4.54 (m, 1H), 4.41 (dd,  $J = 19.5, 11.9$  Hz, 2H), 4.19-4.18 (m, 1H), 3.96 (t,  $J = 6.5$  Hz, 1H), 3.88 (s, 3H), 3.59 (d,  $J = 6.5$  Hz, 2H);  $^{13}\text{C}$  NMR (100 MHz,  $\text{CDCl}_3$ ):  $\delta$  188.1, 156.1, 137.8, 137.4, 137.2, 133.5, 128.7, 128.6, 128.5(2), 128.4, 128.1, 128.0, 127.8(2), 127.7(2), 81.1, 77.7, 76.5, 75.1, 75.0, 73.6, 72.4, 67.7, 55.5; IR (neat) 3418, 3030, 2926, 2874, 1682, 1599, 1090  $\text{cm}^{-1}$ ; HRMS (ESI):  $m/z$  calcd for  $\text{C}_{36}\text{H}_{33}\text{NO}_8$   $[\text{M}+\text{H}]^+$ , 610.2363, found 610.2441.

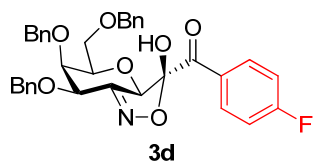

The title compound was prepared according to the general procedure and the compound was obtained as a pale yellow oil (50 mg, 78% yield of diastereomer mixture, 90% *de*);  $[\alpha]_D^{24}$  -202.3 (*c* 0.6,  $\text{CHCl}_3$ );  $^1\text{H}$  NMR (400 MHz,  $\text{CDCl}_3$ ):  $\delta$  8.34-8.30 (m, 2H), 7.41-7.25 (m, 15H), 7.14 (t,  $J = 8.6$  Hz, 2H), 5.59 (s, 1H), 5.48 (s, 1H), 5.08-5.05 (m, 2H), 4.69 (d,  $J = 11.8$  Hz, 1H), 4.61 (d,  $J = 11.2$  Hz, 1H), 4.56-4.55 (m, 1H), 4.42 (dd,  $J = 19.5, 11.8$  Hz, 2H), 4.19-4.18 (m, 1H), 3.97 (t,  $J = 6.5$  Hz, 1H), 3.59 (d,  $J = 6.5$  Hz, 2H);  $^{13}\text{C}$  NMR (100 MHz,  $\text{CDCl}_3$ ):  $\delta$  188.0, 156.3, 137.9, 137.5, 137.2, 134.0, 133.9, 128.6, 128.5, 128.4, 128.1, 128.0, 127.9, 127.8, 115.6, 115.4, 105.8, 81.1, 77.9, 77.2, 75.1, 75.0, 73.6, 72.5, 67.8; IR (neat) 3582, 3030, 2924, 2855, 1688, 1599, 1364  $\text{cm}^{-1}$ ; HRMS (ESI):  $m/z$  calcd for  $\text{C}_{35}\text{H}_{32}\text{FNO}_7$   $[\text{M}+\text{H}]^+$ , 598.2163, found 598.2241.

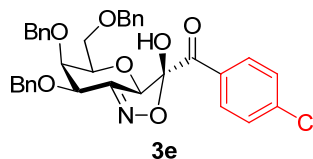

The title compound was prepared according to the general procedure and the compound was obtained as a yellow oil (53 mg, 80% yield of diastereomer mixture, 94% *de*);  $[\alpha]_D^{24}$  -165.6 (*c* 0.1,  $\text{CHCl}_3$ );  $^1\text{H}$  NMR (400 MHz,  $\text{CDCl}_3$ ):  $\delta$  8.22 (d,  $J = 8.7$  Hz, 2H), 7.45-7.27 (m, 17H), 5.71 (s, 1H), 5.57 (s, 1H), 5.06 (dd,  $J = 11.9, 4.2$  Hz, 2H), 4.69 (d,  $J = 11.9$  Hz, 1H), 4.60 (d,  $J = 11.1$  Hz, 1H), 4.56-4.55 (m, 1H), 4.42 (dd,  $J = 20.1, 11.9$  Hz, 2H), 4.20-4.19 (m, 1H), 3.97 (t,  $J = 6.5$  Hz, 1H), 3.59 (d,  $J = 6.5$  Hz, 2H);  $^{13}\text{C}$  NMR (100 MHz,  $\text{CDCl}_3$ ):  $\delta$  188.4, 156.2, 140.4, 137.7, 137.4, 137.1, 132.8, 132.4, 131.1, 129.0, 128.6(2), 128.5, 128.4, 128.1, 128.0, 127.9, 127.8, 105.8, 81.0, 77.8, 76.5, 75.1, 73.5, 72.4, 67.7; IR (neat) 3422, 3030, 2924, 2868, 1597, 735  $\text{cm}^{-1}$ ; HRMS (ESI):  $m/z$  calcd for  $\text{C}_{35}\text{H}_{32}\text{ClNO}_7$   $[\text{M}+\text{H}]^+$ , 614.1867, found 614.1946.

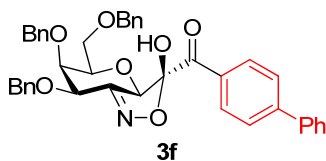

The title compound was prepared according to the general procedure and the compound was obtained as a white solid (59 mg, 83% yield of diastereomer mixture, 90% *de*); **m.p.** 156-157 °C;  $[\alpha]_D^{24}$  -233.7 (*c* 0.1, CHCl<sub>3</sub>); **<sup>1</sup>H NMR (400 MHz, CDCl<sub>3</sub>):** δ 8.35 (d, *J* = 8.6 Hz, 2H), 7.69 (d, *J* = 8.6 Hz, 2H), 7.64 (d, *J* = 7.1 Hz, 2H), 7.47 (t, *J* = 7.1 Hz, 2H), 7.42-7.25 (m, 16H), 5.62 (s, 1H), 5.28 (s, 1H), 5.07 (dd, *J* = 11.9, 2.9 Hz, 2H), 4.69 (d, *J* = 11.9 Hz, 1H), 4.62 (d, *J* = 11.4 Hz, 1H), 4.57-4.56 (m, 1H), 4.41 (dd, *J* = 19.2, 11.9 Hz, 2H), 4.19-4.18 (m, 1H), 3.98 (t, *J* = 6.4 Hz, 1H), 3.59 (d, *J* = 6.4 Hz, 2H); **<sup>13</sup>C NMR (100 MHz, CDCl<sub>3</sub>):** δ 189.2, 156.1, 146.4, 140.0, 137.7, 137.4, 137.2, 132.1, 131.6, 131.5, 131.3, 128.9, 128.8, 128.5(2), 128.4, 128.2, 128.1, 128.0, 127.9, 127.8(2), 127.7(2), 127.3, 127.0, 106.0, 81.0, 77.8, 76.5, 75.1(2), 73.6, 72.4, 67.7; **IR (neat)** 3387, 3030, 2924, 2870, 1682, 1603 cm<sup>-1</sup>; **HRMS (ESI):** *m/z* calcd for C<sub>41</sub>H<sub>37</sub>NO<sub>7</sub> [M+H]<sup>+</sup>, 656.2570, found 656.2648.

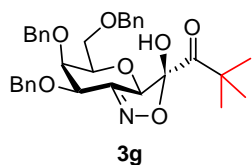

The title compound was prepared according to the general procedure and the compound was obtained as a colourless oil (41 mg, 68% yield of diastereomer mixture, 95% *de*);  $[\alpha]_D^{24}$  -224.1 (*c* 0.2, CHCl<sub>3</sub>); **<sup>1</sup>H NMR (400 MHz, CDCl<sub>3</sub>):** δ 7.38-7.24 (m, 19H), 5.33 (s, 1H), 5.22 (s, 1H), 5.06 (d, *J* = 11.8, 1H), 5.02 (d, *J* = 11.2, 1H), 4.66 (d, *J* = 11.8 Hz, 1H), 4.57 (d, *J* = 11.2 Hz, 1H), 4.52-4.51 (m, 1H), 4.41 (dd, *J* = 16.2, 11.8 Hz, 2H), 4.14-4.13 (m, 1H), 3.90 (t, *J* = 6.5 Hz, 1H), 3.56 (d, *J* = 6.5 Hz, 2H), 1.33 (s, 9H); **<sup>13</sup>C NMR (100 MHz, CDCl<sub>3</sub>):** δ 205.5, 155.5, 137.9, 137.5, 137.3, 128.5(2), 128.4, 128.3, 128.0(3), 127.9(2), 127.8, 127.3, 127.2, 106.1, 81.8, 77.7, 77.2, 75.1, 73.6, 72.4, 67.8, 53.4, 43.8, 29.7, 27.7, 27.1; **IR (neat)** 3406, 3030, 2959, 2930, 2872, 1713, 1557, 1250 cm<sup>-1</sup>; **HRMS (ESI):** *m/z* calcd for C<sub>33</sub>H<sub>37</sub>NO<sub>7</sub> [M+H]<sup>+</sup>, 560.2570, found 560.2648.

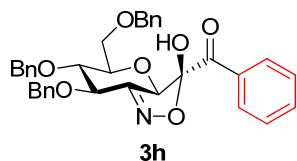

The title compound was prepared according to the general procedure and the compound was obtained as a colourless oil (52 mg, 83% yield of diastereomer mixture, 90% *de*);  $[\alpha]_D^{24}$  -234.2 (*c* 0.2, CHCl<sub>3</sub>); **<sup>1</sup>H NMR (400 MHz, CDCl<sub>3</sub>):** δ 8.26 (d, *J* = 7.4 Hz, 2H), 7.61 (t, *J* = 7.4 Hz, 1H), 7.49 (t, *J* = 7.4 Hz, 2H), 7.41-7.19 (m, 15H), 5.60 (s, 1H), 5.57 (s, 1H), 5.05 (d, *J* = 11.3 Hz, 1H), 4.65 (d, *J* = 10.8 Hz, 1H), 4.69 (d, *J* = 11.3 Hz, 1H), 4.62-4.59 (m, 2H), 4.49 (dd, *J* = 19.7, 11.9 Hz, 2H), 3.88-3.68 (m,

4H);  $^{13}\text{C}$  NMR (100 MHz,  $\text{CDCl}_3$ ):  $\delta$  189.5, 156.3, 137.6, 137.4, 137.4, 137.2, 133.9, 132.5, 131.0, 128.6, 128.5(2), 128.4, 128.3, 128.1(2), 128.0(2), 127.8, 127.7, 106.1, 80.8, 78.6, 78.3, 75.5, 73.5, 73.1, 68.2; IR (neat) 3443, 3030, 2918, 2872, 1694, 1682, 1599  $\text{cm}^{-1}$ ; HRMS (ESI):  $m/z$  calcd for  $\text{C}_{35}\text{H}_{33}\text{NO}_7$   $[\text{M}+\text{H}]^+$ , 580.2257, found 580.2335.

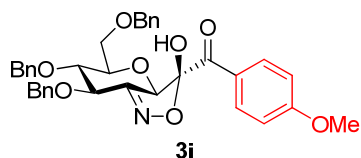

The title compound was prepared according to the general procedure and the compound was obtained as a colourless oil (54 mg, 81% yield of diastereomer mixture, 93% *de*);  $[\alpha]_D^{24}$  -243.4 (*c* 0.5,  $\text{CHCl}_3$ );  $^1\text{H}$  NMR (400 MHz,  $\text{CDCl}_3$ ):  $\delta$  8.25 (d,  $J = 9.0$  Hz, 2H), 7.41-7.19 (m, 15H), 6.95 (d,  $J = 9.0$  Hz, 2H), 5.61 (s, 1H), 5.50 (s, 1H), 5.05 (d,  $J = 11.4$  Hz, 1H), 4.94 (d,  $J = 10.8$  Hz, 1H), 4.68 (d,  $J = 11.4$  Hz, 1H), 4.61-4.57 (m, 2H), 4.51 (dd,  $J = 21.0, 12.0$  Hz, 2H), 4.03-3.66 (m, 4H), 3.87 (s, 3H);  $^{13}\text{C}$  NMR (100 MHz,  $\text{CDCl}_3$ ):  $\delta$  188.1, 164.2, 156.3, 137.7, 137.4, 137.3, 133.5, 128.5(3), 128.3, 128.1(2), 128.0, 127.9, 125.4, 113.7, 106.4, 80.9, 78.6, 78.5, 78.3, 76.7, 75.5, 73.5, 73.1, 68.2, 55.5; IR (neat) 3418, 3030, 2934, 2872, 1682, 1599, 1098  $\text{cm}^{-1}$ ; HRMS (ESI):  $m/z$  calcd for  $\text{C}_{36}\text{H}_{33}\text{NO}_8$   $[\text{M}+\text{H}]^+$ , 610.2363, found 610.2441.

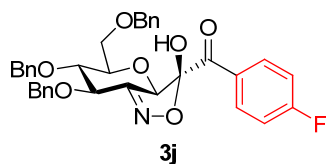

The title compound was prepared according to the general procedure and the compound was obtained as a pale yellow oil (52 mg, 81% yield of diastereomer mixture, 93% *de*);  $[\alpha]_D^{24}$  -155.4 (*c* 0.5,  $\text{CHCl}_3$ );  $^1\text{H}$  NMR (400 MHz,  $\text{CDCl}_3$ ):  $\delta$  8.33-8.29 (m, 2H), 7.40-7.13 (m, 17H), 5.60 (s, 1H), 5.51 (s, 1H), 5.04 (d,  $J = 11.4$  Hz, 1H), 4.94 (d,  $J = 10.8$  Hz, 1H), 4.68 (d,  $J = 11.4$  Hz, 1H), 4.61-4.58 (m, 2H), 4.48 (dd,  $J = 19.5, 11.90$  Hz, 2H), 3.95-3.72 (m, 4H);  $^{13}\text{C}$  NMR (100 MHz,  $\text{CDCl}_3$ ):  $\delta$  188.0, 165.0, 156.4, 137.6, 137.3, 137.2, 134.0, 133.9, 129.0, 128.6, 128.5(2), 128.3, 128.1(2), 128.0, 127.9, 115.7, 115.5, 106.3, 80.6, 78.6, 78.5, 78.2, 75.6, 73.5, 73.1, 68.2; IR (neat) 3383, 3030, 2957, 2922, 2870, 1599, 1099  $\text{cm}^{-1}$ ; HRMS (ESI):  $m/z$  calcd for  $\text{C}_{35}\text{H}_{32}\text{FNO}_7$   $[\text{M}+\text{H}]^+$ , 598.2163, found 598.2241.

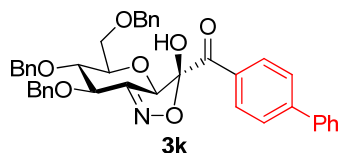

The title compound was prepared according to the general procedure and the compound was obtained as a colourless oil (56 mg, 79% yield of diastereomer mixture, 92% *de*);  $[\alpha]_D^{24}$  -173.0 (*c* 0.1,  $\text{CHCl}_3$ );  $^1\text{H}$  NMR (400 MHz,  $\text{CDCl}_3$ ):  $\delta$  8.34 (d,  $J = 8.4$  Hz, 2H), 7.69 (d,  $J = 8.4$  Hz, 2H), 7.62 (d,  $J =$



7.3 Hz, 2H), 7.46 (t,  $J = 7.3$  Hz, 2H), 7.41-7.19 (m, 16H), 5.63 (s, 1H), 5.52 (s, 1H), 5.05 (d,  $J = 11.4$  Hz, 1H), 4.94 (d,  $J = 10.8$  Hz, 1H), 4.68 (d,  $J = 11.4$  Hz, 1H), 4.63-4.57 (m, 2H), 4.48 (dd,  $J = 20.6, 11.9$  Hz, 2H), 3.95-3.75 (m, 4H);  $^{13}\text{C}$  NMR (100 MHz,  $\text{CDCl}_3$ ):  $\delta$  189.2, 156.4, 146.5, 139.9, 137.7, 137.5, 137.3, 131.8, 131.6, 131.3, 129.0, 128.6, 128.6, 128.5, 128.4, 128.3, 128.2, 128.1(2), 128.0, 127.9, 127.4, 127.2, 127.1, 126.7, 106.3, 80.9, 78.7, 78.6, 78.3, 75.6, 73.5, 73.1, 68.2; IR (neat) 3420, 3030, 2922, 2870, 1684, 1603  $\text{cm}^{-1}$ ; HRMS (ESI):  $m/z$  calcd for  $\text{C}_{41}\text{H}_{37}\text{NO}_7$   $[\text{M}+\text{H}]^+$ , 656.2570, found 656.2648.

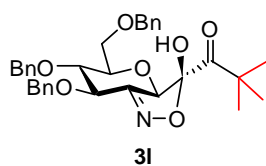

The title compound was prepared according to the general procedure and the compound was obtained as a pale yellow oil (42 mg, 70% yield of diastereomer mixture, 92% *de*);  $[\alpha]_D^{24}$  -176.3 ( $c$  0.1,  $\text{CHCl}_3$ );  $^1\text{H}$  NMR (400 MHz,  $\text{CDCl}_3$ ):  $\delta$  7.38-7.25 (m, 19H), 5.31 (s, 1H), 5.06-5.03 (m, 1H), 4.92 (d,  $J = 10.8$  Hz, 1H), 4.67-4.47 (m, 7H), 3.84-3.73 (m, 3H), 1.34 (s, 6H), 1.20 (s, 3H);  $^{13}\text{C}$  NMR (100 MHz,  $\text{CDCl}_3$ ):  $\delta$  205.3, 155.6, 137.6, 137.4, 137.2, 128.5, 128.4(2), 128.2(2), 128.1, 128.0, 127.9, 127.8(2), 127.7(2), 106.3, 81.3, 78.6, 78.5, 78.4, 75.5, 73.4, 73.3, 72.9, 72.2, 72.1, 68.2, 43.7, 27.7, 27.1, 25.9, 25.6; IR (neat) 3391, 3030, 2959, 2930, 2872, 1713, 1557, 1059  $\text{cm}^{-1}$ ; HRMS (ESI):  $m/z$  calcd for  $\text{C}_{33}\text{H}_{37}\text{NO}_7$   $[\text{M}+\text{H}]^+$ , 560.2570, found 560.2648.

## X-ray spectra of carbohydrate-integrated isoxazolines (3b)

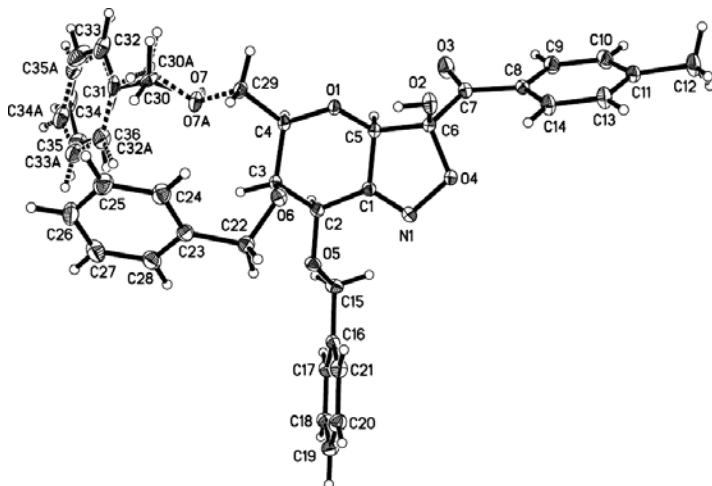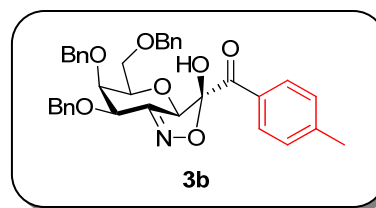

Table 1. Crystal data and structure refinement.

|                                 |                                                  |                 |
|---------------------------------|--------------------------------------------------|-----------------|
| Identification code             | Compound 3b                                      |                 |
| Empirical formula               | C <sub>36</sub> H <sub>35</sub> N O <sub>7</sub> |                 |
| Formula weight                  | 593.65                                           |                 |
| Temperature                     | 103(2) K                                         |                 |
| Wavelength                      | 0.71073 Å                                        |                 |
| Crystal system                  | Monoclinic                                       |                 |
| Space group                     | P2(1)                                            |                 |
| Unit cell dimensions            | a = 10.4039(4) Å                                 | α = 90°.        |
|                                 | b = 11.4624(4) Å                                 | β = 91.861(2)°. |
|                                 | c = 12.6741(4) Å                                 | γ = 90°.        |
| Volume                          | 1510.64(9) Å <sup>3</sup>                        |                 |
| Z                               | 2                                                |                 |
| Density (calculated)            | 1.305 Mg/m <sup>3</sup>                          |                 |
| Absorption coefficient          | 0.090 mm <sup>-1</sup>                           |                 |
| F(000)                          | 628                                              |                 |
| Crystal size                    | 0.40 x 0.38 x 0.26 mm <sup>3</sup>               |                 |
| Theta range for data collection | 1.61 to 33.16°.                                  |                 |
| Index ranges                    | -15 ≤ h ≤ 15, -16 ≤ k ≤ 17, -19 ≤ l ≤ 19         |                 |
| Reflections collected           | 37285                                            |                 |

|                                   |                                             |
|-----------------------------------|---------------------------------------------|
| Independent reflections           | 5923 [R(int) = 0.0371]                      |
| Completeness to theta = 33.16°    | 98.6 %                                      |
| Absorption correction             | Semi-empirical from equivalents             |
| Max. and min. transmission        | 0.9769 and 0.9647                           |
| Refinement method                 | Full-matrix least-squares on F <sup>2</sup> |
| Data / restraints / parameters    | 5923 / 264 / 472                            |
| Goodness-of-fit on F <sup>2</sup> | 1.080                                       |
| Final R indices [I>2sigma(I)]     | R1 = 0.0405, wR2 = 0.1015                   |
| R indices (all data)              | R1 = 0.0507, wR2 = 0.1139                   |
| Largest diff. peak and hole       | 0.535 and -0.412 e.Å <sup>-3</sup>          |

## Gaussian Calculations<sup>2</sup>

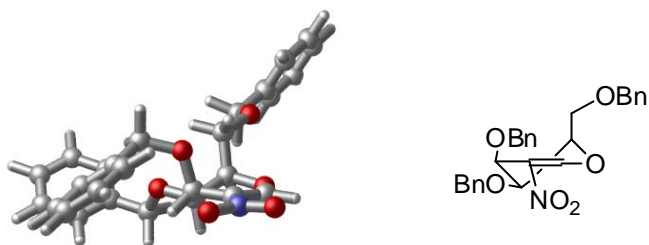

|     |             |             |             |
|-----|-------------|-------------|-------------|
| 0 1 |             |             |             |
| C   | -1.04307900 | -2.79705000 | -0.93814800 |
| C   | 0.18429600  | -3.12224700 | -1.40884300 |
| H   | 0.44501700  | -4.12765800 | -1.70959100 |
| O   | 1.19881100  | -2.23878300 | -1.58880100 |
| C   | -1.41655300 | -1.40669000 | -0.51830100 |
| H   | -2.44857000 | -1.18000100 | -0.80296500 |
| C   | -0.45595800 | -0.44164000 | -1.23978700 |
| H   | -0.69645700 | -0.48665800 | -2.31363100 |
| N   | -2.01917700 | -3.84774100 | -0.81477900 |
| O   | -3.20154000 | -3.52068900 | -0.49218900 |
| O   | -1.66302000 | -5.04628700 | -1.04905200 |
| O   | -1.28936900 | -1.35873300 | 0.93595200  |
| O   | -0.67107000 | 0.90741600  | -0.75004900 |
| C   | 1.02167900  | -0.84859000 | -1.06575900 |
| H   | 1.65517100  | -0.26362500 | -1.73639300 |
| C   | -2.02427100 | -0.29130500 | 1.65782300  |
| H   | -1.80052300 | -0.53640300 | 2.70011400  |
| H   | -1.58491400 | 0.67671600  | 1.41050100  |
| C   | -0.44428700 | 1.97753700  | -1.74190300 |
| H   | 0.60214000  | 1.95548100  | -2.07297100 |
| H   | -1.08763300 | 1.79070200  | -2.61167600 |
| C   | -3.51351800 | -0.27667600 | 1.41107600  |
| C   | -4.29713000 | -1.41700900 | 1.66008400  |
| C   | -4.13937500 | 0.89386700  | 0.95149500  |
| C   | -5.67957300 | -1.38238000 | 1.46095800  |
| H   | -3.81722800 | -2.33375400 | 1.98411800  |
| C   | -5.52603300 | 0.93243600  | 0.76180000  |
| H   | -3.53644100 | 1.77382000  | 0.74507600  |
| C   | -6.29829800 | -0.20604200 | 1.01679700  |
| H   | -6.27295900 | -2.27142200 | 1.64829500  |
| H   | -5.99981500 | 1.84503600  | 0.41276200  |
| H   | -7.37323200 | -0.18026700 | 0.86680700  |
| C   | -0.77309900 | 3.29214600  | -1.09248500 |
| C   | -2.07387000 | 3.81660700  | -1.16607700 |
| C   | 0.20536700  | 3.99453400  | -0.37125600 |
| C   | -2.38976800 | 5.02362200  | -0.53347900 |
| H   | -2.83698700 | 3.27820300  | -1.72086200 |
| C   | -0.10748400 | 5.20098700  | 0.26281000  |
| H   | 1.21335800  | 3.59419200  | -0.30712400 |
| C   | -1.40643700 | 5.71744700  | 0.18217200  |
| H   | -3.39684600 | 5.42236300  | -0.60048500 |
| H   | 0.65758800  | 5.73646200  | 0.81562600  |
| H   | -1.65007200 | 6.65502300  | 0.67139600  |
| C   | 1.56286700  | -0.76844600 | 0.36294900  |
| H   | 1.15603900  | -1.57298200 | 0.97388600  |
| H   | 1.25583100  | 0.18955000  | 0.80229000  |
| O   | 3.00609500  | -0.91552300 | 0.39540600  |

|   |            |             |             |
|---|------------|-------------|-------------|
| C | 3.76008800 | 0.30273200  | 0.14470800  |
| H | 3.37790800 | 1.09875100  | 0.80748400  |
| H | 3.62175700 | 0.64698400  | -0.89222400 |
| C | 5.22522500 | 0.04651500  | 0.40837100  |
| C | 6.19949000 | 0.80530600  | -0.25878700 |
| C | 5.63013600 | -0.91599900 | 1.34530000  |
| C | 7.55844100 | 0.61541200  | 0.01352100  |
| H | 5.89621000 | 1.54338700  | -0.99748400 |
| C | 6.98954100 | -1.11158700 | 1.61098600  |
| H | 4.87590000 | -1.51490600 | 1.84105100  |
| C | 7.95714800 | -0.34502400 | 0.95041300  |
| H | 8.30217500 | 1.20788300  | -0.51036300 |
| H | 7.29296800 | -1.86405000 | 2.33234700  |
| H | 9.01134100 | -0.49862400 | 1.15871200  |

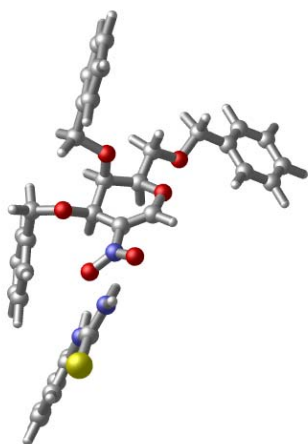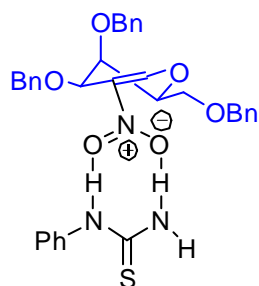

|     |             |             |             |
|-----|-------------|-------------|-------------|
| 0 1 |             |             |             |
| C   | 0.07360600  | 0.07684600  | -0.68136200 |
| C   | -0.91937100 | -0.30167200 | -1.53061800 |
| H   | -0.75073200 | -0.46808100 | -2.58613700 |
| O   | -2.18205300 | -0.56040300 | -1.14929000 |
| C   | -0.17391300 | 0.38447100  | 0.77292200  |
| H   | 0.12769500  | -0.45419800 | 1.41639400  |
| C   | -1.69571900 | 0.64684200  | 0.95177800  |
| H   | -1.92539200 | 0.68809800  | 2.02716900  |
| C   | -2.51261100 | -0.47352800 | 0.31045600  |
| H   | -2.25150300 | -1.44955100 | 0.73468300  |
| O   | 0.59921100  | 1.55925300  | 1.12878400  |
| C   | 0.90022200  | 1.74288900  | 2.56674700  |
| H   | 1.54090400  | 2.62754200  | 2.55049500  |
| H   | -0.02282600 | 1.99781400  | 3.10446400  |
| C   | 1.58560600  | 0.57767500  | 3.23716900  |
| C   | 2.86082000  | 0.15800300  | 2.81755800  |
| C   | 0.96827800  | -0.08510300 | 4.31129400  |
| C   | 3.50489500  | -0.89968600 | 3.46517400  |
| H   | 3.33744500  | 0.65310700  | 1.97905500  |
| C   | 1.61374400  | -1.14249900 | 4.96338300  |
| H   | -0.01417400 | 0.23760200  | 4.64791400  |
| C   | 2.88316400  | -1.55026800 | 4.54012800  |
| H   | 4.48790100  | -1.21319200 | 3.13029700  |
| H   | 1.12906000  | -1.64228400 | 5.79609600  |

|   |             |             |             |
|---|-------------|-------------|-------------|
| H | 3.38755200  | -2.36803300 | 5.04504900  |
| O | -2.14864200 | 1.84937700  | 0.28867500  |
| C | -1.92770300 | 3.14756700  | 0.95983500  |
| H | -0.88709100 | 3.44261700  | 0.81813700  |
| C | -4.01230700 | -0.27258100 | 0.38674700  |
| H | -4.28783700 | 0.06810000  | 1.39728100  |
| H | -4.31369000 | 0.49748100  | -0.33181200 |
| O | -4.61964300 | -1.55075100 | 0.09515400  |
| C | -6.05368100 | -1.48981000 | -0.16486600 |
| H | -6.59136100 | -1.18655900 | 0.74595500  |
| H | -6.23842900 | -0.72003400 | -0.93219400 |
| C | -6.52299900 | -2.84363600 | -0.63489900 |
| C | -5.74156400 | -3.59598300 | -1.52669100 |
| C | -7.76254700 | -3.34899300 | -0.21596000 |
| C | -6.19772200 | -4.83266700 | -1.99217700 |
| H | -4.77492000 | -3.21200900 | -1.83266000 |
| C | -8.22356800 | -4.58286200 | -0.68942300 |
| H | -8.36763100 | -2.77895400 | 0.48421500  |
| C | -7.44128700 | -5.32781200 | -1.57844100 |
| H | -5.58464500 | -5.40992300 | -2.67731000 |
| H | -9.18472100 | -4.96347200 | -0.35829800 |
| H | -7.79451200 | -6.28738600 | -1.94264500 |
| H | -2.12058400 | 3.02267000  | 2.03531400  |
| C | -2.87922600 | 4.14125300  | 0.35393300  |
| C | -4.18610600 | 4.27712700  | 0.84998800  |
| C | -2.48279700 | 4.92381600  | -0.74210100 |
| C | -5.07918800 | 5.18069300  | 0.26639000  |
| H | -4.50116100 | 3.67673000  | 1.69946000  |
| C | -3.37412200 | 5.82744000  | -1.32991600 |
| H | -1.47504100 | 4.82163700  | -1.13400300 |
| C | -4.67375800 | 5.95746000  | -0.82620800 |
| H | -6.08470100 | 5.28206000  | 0.66246500  |
| H | -3.05585500 | 6.42833500  | -2.17572100 |
| H | -5.36483600 | 6.66119500  | -1.27919000 |
| N | 1.38994500  | 0.13561600  | -1.21601400 |
| O | 2.37790100  | 0.03066100  | -0.42076300 |
| O | 1.54542200  | 0.25745700  | -2.48135500 |
| C | 5.50479800  | 0.47538100  | -2.70595600 |
| N | 4.39719100  | 1.01993700  | -3.28303200 |
| H | 3.44775300  | 0.78712100  | -3.00594000 |
| S | 7.06395000  | 0.77664000  | -3.41830800 |
| N | 5.22284000  | -0.26579600 | -1.58661900 |
| H | 4.25158100  | -0.22676900 | -1.28029400 |
| C | 6.02323700  | -1.09733800 | -0.76373400 |
| C | 5.32143700  | -1.89788900 | 0.16371800  |
| C | 7.42662300  | -1.16969900 | -0.80248400 |
| C | 6.00636300  | -2.75411600 | 1.02649100  |
| H | 4.23675100  | -1.84924900 | 0.19679300  |
| C | 8.09846200  | -2.03516300 | 0.06833600  |
| H | 7.97319100  | -0.56022800 | -1.50645900 |
| C | 7.40425400  | -2.83101000 | 0.98454600  |
| H | 5.44455600  | -3.37004400 | 1.72272100  |
| H | 9.18233000  | -2.08034300 | 0.02400700  |
| H | 7.93904100  | -3.49985300 | 1.65112900  |
| H | 4.54335200  | 1.59790700  | -4.09401100 |

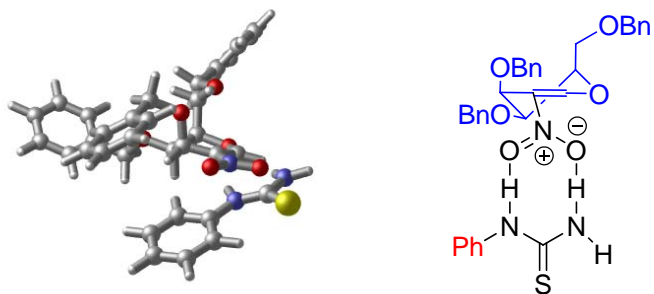

|     |             |             |             |
|-----|-------------|-------------|-------------|
| 0 1 |             |             |             |
| C   | -0.22724000 | -1.47029900 | -0.67944100 |
| C   | 0.64286600  | -2.38048800 | -1.19654800 |
| H   | 0.34385400  | -3.38318500 | -1.47154700 |
| O   | 1.94020600  | -2.13018800 | -1.45555200 |
| C   | 0.18573300  | -0.08192500 | -0.28479600 |
| H   | -0.60220700 | 0.64291700  | -0.51240900 |
| C   | 1.44839800  | 0.26518800  | -1.09804200 |
| H   | 1.14397600  | 0.34373300  | -2.15378000 |
| N   | -1.56983300 | -1.88396900 | -0.46293600 |
| O   | 0.42054700  | -0.12211200 | 1.15305400  |
| O   | 1.96902200  | 1.53892300  | -0.64499100 |
| C   | 2.53151600  | -0.82765800 | -0.99426500 |
| H   | 3.31606300  | -0.65839700 | -1.73467300 |
| C   | 0.38314200  | 1.16528700  | 1.89894500  |
| H   | 0.53025300  | 0.82448400  | 2.92713800  |
| H   | 1.23217700  | 1.77806100  | 1.59180100  |
| C   | 2.63781900  | 2.35178800  | -1.68571800 |
| H   | 3.51789000  | 1.81256100  | -2.05868400 |
| H   | 1.93761100  | 2.49500300  | -2.51872200 |
| C   | -0.90921400 | 1.92857700  | 1.75511600  |
| C   | -2.12559300 | 1.36905400  | 2.18516600  |
| C   | -0.90890600 | 3.22153000  | 1.20593900  |
| C   | -3.31592200 | 2.09317100  | 2.07752100  |
| H   | -2.13573200 | 0.36296300  | 2.59159100  |
| C   | -2.09976500 | 3.95107300  | 1.10412800  |
| H   | 0.02712100  | 3.65435100  | 0.86451600  |
| C   | -3.30415300 | 3.38821600  | 1.54006300  |
| H   | -4.25050100 | 1.65168200  | 2.40666800  |
| H   | -2.08687100 | 4.95304500  | 0.68618800  |
| H   | -4.22951100 | 3.95015700  | 1.46282700  |
| C   | 3.03206700  | 3.66414400  | -1.07114000 |
| C   | 2.16776900  | 4.76933200  | -1.13626200 |
| C   | 4.25496100  | 3.79307800  | -0.39322700 |
| C   | 2.52084800  | 5.98291900  | -0.53677000 |
| H   | 1.22067400  | 4.67848200  | -1.66069700 |
| C   | 4.60993800  | 5.00459200  | 0.20769700  |
| H   | 4.92920700  | 2.94294600  | -0.33753000 |
| C   | 3.74265200  | 6.10162800  | 0.13655700  |
| H   | 1.84828400  | 6.83227700  | -0.59744900 |
| H   | 5.55869000  | 5.09406000  | 0.72667600  |
| H   | 4.01859500  | 7.04338300  | 0.59965900  |
| O   | -1.88808500 | -3.10812500 | -0.65493100 |
| O   | -2.42195200 | -1.01085900 | -0.09625800 |
| N   | -5.45972700 | -1.74386400 | -0.17093800 |
| N   | -4.70721300 | -3.86018100 | 0.24576400  |
| H   | -4.88297100 | -4.81274700 | 0.51920900  |
| H   | -3.76771000 | -3.58999300 | -0.03021200 |
| H   | -4.46147100 | -1.54044800 | -0.17638100 |
| C   | -5.78690200 | -3.03363700 | 0.16257100  |

|   |             |             |             |
|---|-------------|-------------|-------------|
| S | -7.36997200 | -3.67166800 | 0.50338600  |
| C | -6.25347500 | -0.60411500 | -0.45695000 |
| C | -5.55887200 | 0.62061200  | -0.55027700 |
| C | -7.64090000 | -0.62159000 | -0.68253600 |
| C | -6.23661200 | 1.80088500  | -0.85555500 |
| H | -4.48707700 | 0.64276900  | -0.37772600 |
| C | -8.30625300 | 0.57134000  | -0.98592800 |
| H | -8.18449400 | -1.55139600 | -0.60921000 |
| C | -7.61946800 | 1.78636000  | -1.07465900 |
| H | -5.67981400 | 2.73106600  | -0.91939100 |
| H | -9.37831500 | 0.54139700  | -1.15526300 |
| H | -8.14976300 | 2.70356400  | -1.31008100 |
| C | 3.15300200  | -1.02335300 | 0.39006900  |
| H | 2.44294300  | -1.49677900 | 1.06700000  |
| H | 3.41390800  | -0.03774100 | 0.79741700  |
| O | 4.31327500  | -1.88913700 | 0.33059300  |
| C | 5.56716300  | -1.22431100 | -0.00212500 |
| H | 5.69618600  | -0.36114100 | 0.67326400  |
| H | 5.54539400  | -0.83498200 | -1.03183600 |
| C | 6.70601100  | -2.20287800 | 0.15329300  |
| C | 7.84546600  | -2.08720500 | -0.65760600 |
| C | 6.66077700  | -3.20697900 | 1.13260300  |
| C | 8.93104300  | -2.95290700 | -0.48586900 |
| H | 7.88319700  | -1.32154400 | -1.42859700 |
| C | 7.74233400  | -4.07811700 | 1.29775900  |
| H | 5.77051600  | -3.30834900 | 1.74171900  |
| C | 8.88162100  | -3.95145300 | 0.49338300  |
| H | 9.80644300  | -2.85387300 | -1.12007000 |
| H | 7.69523000  | -4.85643000 | 2.05303700  |
| H | 9.71999500  | -4.62829700 | 0.62425500  |

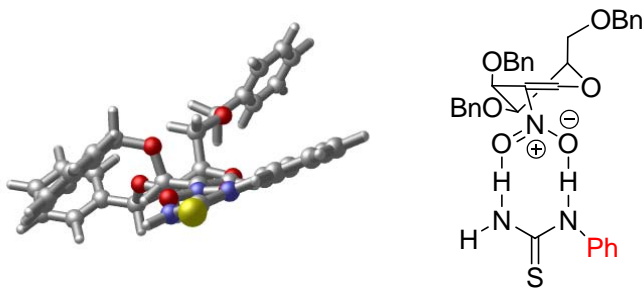

|    |             |             |             |
|----|-------------|-------------|-------------|
| 01 |             |             |             |
| C  | 0.58973800  | 0.24243600  | -0.90457900 |
| C  | 0.20609200  | 1.46704200  | -1.35675100 |
| H  | 0.91369500  | 2.23036600  | -1.65205800 |
| O  | -1.07528600 | 1.84701300  | -1.52162000 |
| C  | -0.38938700 | -0.81341200 | -0.48308000 |
| H  | -0.03492200 | -1.80944900 | -0.76584300 |
| C  | -1.71958800 | -0.51889600 | -1.20233300 |
| H  | -1.55675400 | -0.69259300 | -2.27836400 |
| N  | 1.98027000  | -0.02319700 | -0.78373900 |
| O  | -0.49637300 | -0.72099700 | 0.96834000  |
| O  | -2.72379500 | -1.43718500 | -0.70939400 |
| C  | -2.16965000 | 0.94580300  | -1.02021200 |
| H  | -2.98852300 | 1.18293700  | -1.70243500 |
| C  | -0.94087900 | -1.93979500 | 1.69872200  |
| H  | -0.93225200 | -1.58995500 | 2.73417500  |
| H  | -1.96357700 | -2.17748100 | 1.40162500  |
| C  | -3.82384800 | -1.74491200 | -1.64949200 |
| H  | -4.45649500 | -0.85777500 | -1.77670100 |
| H  | -3.38517700 | -2.00427100 | -2.62235800 |



|   |             |             |             |
|---|-------------|-------------|-------------|
| C | -0.03161600 | -3.12766800 | 1.51253900  |
| C | 1.30485900  | -3.08066300 | 1.94720800  |
| C | -0.51136700 | -4.30147500 | 0.90839000  |
| C | 2.14118100  | -4.18825900 | 1.78900000  |
| H | 1.68667900  | -2.17098900 | 2.39949900  |
| C | 0.32437000  | -5.41444200 | 0.75393100  |
| H | -1.54192600 | -4.34109200 | 0.56582600  |
| C | 1.65106600  | -5.35925400 | 1.19435800  |
| H | 3.17072500  | -4.14054900 | 2.12911800  |
| H | -0.05831400 | -6.31917900 | 0.29173800  |
| H | 2.30028200  | -6.22112700 | 1.07626900  |
| C | -4.61309100 | -2.89066000 | -1.08307400 |
| C | -4.20218000 | -4.21489000 | -1.31081600 |
| C | -5.74790000 | -2.65469100 | -0.29168400 |
| C | -4.91480400 | -5.28373500 | -0.75890600 |
| H | -3.32591200 | -4.40561800 | -1.92404500 |
| C | -6.46289500 | -3.72219700 | 0.26143000  |
| H | -6.07178000 | -1.63372000 | -0.10972800 |
| C | -6.04690000 | -5.03819600 | 0.02852500  |
| H | -4.59242000 | -6.30301600 | -0.94499500 |
| H | -7.34044200 | -3.52849800 | 0.86957400  |
| H | -6.60230000 | -5.86727500 | 0.45478600  |
| O | 2.82388400  | 0.91704700  | -0.98867200 |
| O | 2.34130900  | -1.20694200 | -0.48613900 |
| N | 5.34034200  | -1.71040400 | -0.33643000 |
| N | 5.83580300  | 0.52038400  | -0.29021400 |
| H | 4.84402800  | 0.59879500  | -0.51073500 |
| H | 4.34962800  | -1.50397300 | -0.41946100 |
| C | 6.31015300  | -0.76189500 | -0.20044500 |
| S | 7.95557700  | -1.27756000 | 0.04662500  |
| H | 5.63808200  | -2.67114300 | -0.30371500 |
| C | 6.46186500  | 1.78729100  | -0.16163300 |
| C | 5.62680400  | 2.90494300  | -0.37699500 |
| C | 7.81235900  | 1.99710700  | 0.16651500  |
| C | 6.13053200  | 4.20051500  | -0.26961400 |
| H | 4.58149500  | 2.74939300  | -0.62757700 |
| C | 8.30216500  | 3.30398200  | 0.27021200  |
| H | 8.46120100  | 1.15020200  | 0.33105500  |
| C | 7.47629100  | 4.41126100  | 0.05511700  |
| H | 5.46986100  | 5.04525100  | -0.44009100 |
| H | 9.34797100  | 3.44923600  | 0.52351500  |
| H | 7.87111200  | 5.41868800  | 0.13851100  |
| C | -2.54027700 | 1.35590900  | 0.40600500  |
| H | -1.64983800 | 1.42041400  | 1.03014100  |
| H | -3.20075700 | 0.58802400  | 0.82976100  |
| O | -3.16660200 | 2.66186200  | 0.43396200  |
| C | -4.60706800 | 2.66550000  | 0.21285900  |
| H | -5.07139200 | 1.94951000  | 0.91250900  |
| H | -4.84947900 | 2.33049600  | -0.80784100 |
| C | -5.14193100 | 4.05938700  | 0.43731200  |
| C | -6.28689600 | 4.48901300  | -0.25117200 |
| C | -4.53292000 | 4.92289800  | 1.36050500  |
| C | -6.82501300 | 5.75821800  | -0.01314200 |
| H | -6.75715600 | 3.83228200  | -0.97903500 |
| C | -5.06588700 | 6.19531400  | 1.59124700  |
| H | -3.63626600 | 4.59651800  | 1.87343800  |
| C | -6.21465100 | 6.61532000  | 0.90966000  |
| H | -7.71058200 | 6.07924800  | -0.55266500 |
| H | -4.58346700 | 6.85911800  | 2.30192300  |
| H | -6.62663400 | 7.60292000  | 1.09140000  |

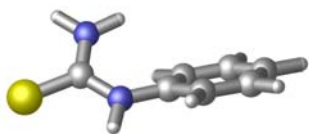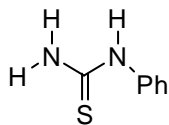

01

|   |             |             |             |
|---|-------------|-------------|-------------|
| C | -1.81590200 | 0.15950300  | 0.13130000  |
| S | -3.42908900 | -0.37027000 | -0.21971400 |
| N | -1.57188400 | 1.30267600  | 0.82027000  |
| H | -2.36672500 | 1.83908700  | 1.12633500  |
| H | -0.64650800 | 1.57659800  | 1.11637700  |
| N | -0.73758600 | -0.58990300 | -0.26713600 |
| H | -0.99685000 | -1.47832400 | -0.67404800 |
| C | 0.65340900  | -0.29684400 | -0.15297500 |
| C | 1.52556400  | -1.31977500 | 0.25691000  |
| C | 1.17432500  | 0.96556000  | -0.49030700 |
| C | 2.89948100  | -1.08037200 | 0.33635400  |
| H | 1.12009500  | -2.29185900 | 0.51959300  |
| C | 2.54931700  | 1.20161800  | -0.38619400 |
| H | 0.51474000  | 1.74033500  | -0.86517000 |
| C | 3.41660200  | 0.18353900  | 0.02535000  |
| H | 3.56419400  | -1.87809200 | 0.65139300  |
| H | 2.94311000  | 2.17804000  | -0.64944700 |
| H | 4.48287000  | 0.36975400  | 0.09582700  |

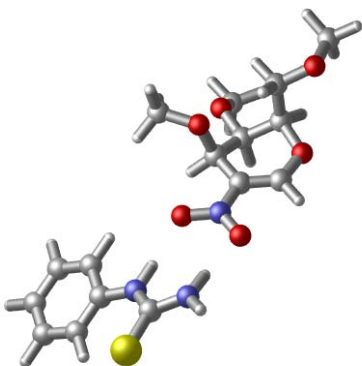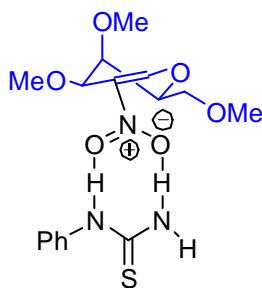

01

|   |             |             |             |
|---|-------------|-------------|-------------|
| C | 1.53751500  | -0.76372900 | -0.47114200 |
| C | 2.38368300  | -1.70448700 | -0.97175100 |
| H | 2.05399600  | -2.69055200 | -1.27154800 |
| O | 3.69952200  | -1.50316300 | -1.17375100 |
| C | 1.99021900  | 0.60317000  | -0.05670100 |
| H | 1.24462300  | 1.35412500  | -0.33846900 |
| C | 3.31154200  | 0.90608100  | -0.78488600 |
| H | 3.08243600  | 1.02681700  | -1.85558700 |
| N | 0.17195200  | -1.10517000 | -0.28445100 |
| O | 2.15720400  | 0.59261700  | 1.38802500  |
| O | 3.84895900  | 2.13936700  | -0.25553400 |
| C | 4.32818000  | -0.24399600 | -0.63876700 |
| H | 5.16794600  | -0.10207400 | -1.32165200 |
| O | -0.22633600 | -2.28916700 | -0.55040800 |
| O | -0.61917300 | -0.19759500 | 0.13783600  |
| N | -3.68134600 | -0.58798400 | 0.03625500  |



|   |             |             |             |
|---|-------------|-------------|-------------|
| C | 5.81027700  | 0.09450700  | -0.38612500 |
| H | 6.14834500  | 1.12475000  | -0.19095800 |
| H | 6.03830300  | -0.51589300 | 0.49488400  |
| O | 6.43350400  | -0.42875600 | -1.58019300 |
| N | 0.28210000  | -0.99385500 | 0.01763800  |
| O | -0.61431100 | -0.10472900 | -0.16681200 |
| O | -0.01070400 | -2.21961300 | 0.22981300  |
| C | -4.03541700 | -1.95707600 | 0.24567400  |
| N | -3.02354400 | -2.84102600 | 0.46887400  |
| H | -2.03798900 | -2.60427200 | 0.40404600  |
| S | -5.68375000 | -2.50909900 | 0.32852900  |
| N | -3.60130200 | -0.69105700 | -0.04986900 |
| H | -2.59076300 | -0.57350200 | -0.10620500 |
| C | -4.31442300 | 0.49848900  | -0.34910800 |
| C | -3.61229100 | 1.47949800  | -1.07905100 |
| C | -5.62740500 | 0.76731000  | 0.07290500  |
| C | -4.21110100 | 2.70274900  | -1.38340000 |
| H | -2.60195000 | 1.26746500  | -1.41702000 |
| C | -6.21812700 | 1.99448000  | -0.24690900 |
| H | -6.17410800 | 0.01998800  | 0.62854000  |
| C | -5.52248800 | 2.96811900  | -0.97148500 |
| H | -3.65629000 | 3.44329900  | -1.95190800 |
| H | -7.23472700 | 2.18699800  | 0.08186800  |
| H | -5.99338200 | 3.91553700  | -1.21309800 |
| H | -3.28525700 | -3.78866100 | 0.68419000  |
| C | 0.40797700  | 2.63258400  | 0.71806700  |
| H | -0.40833300 | 2.27383700  | 0.08791200  |
| H | 0.00755600  | 3.01790200  | 1.65584300  |
| H | 0.96883500  | 3.42561600  | 0.20657000  |
| C | 3.70647000  | 1.49831300  | 2.73583300  |
| H | 2.65775500  | 1.58468900  | 3.01677300  |
| H | 4.29729900  | 1.08595800  | 3.55501900  |
| H | 4.09857100  | 2.48729800  | 2.46103600  |
| C | 7.85354300  | -0.68505100 | -1.43602200 |
| H | 8.18590900  | -1.08550300 | -2.39391800 |
| H | 8.40789600  | 0.23769000  | -1.21267800 |
| H | 8.04632300  | -1.42056800 | -0.64319100 |

Calculation 1:

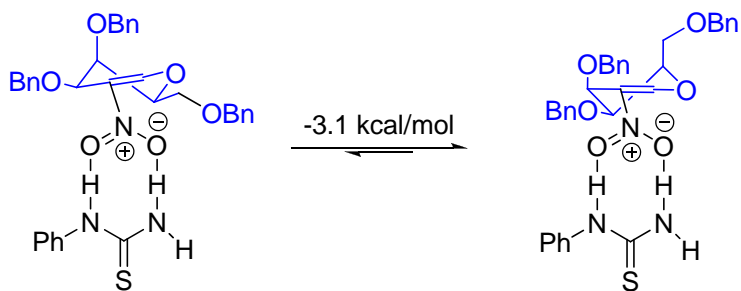

Calculation 2:

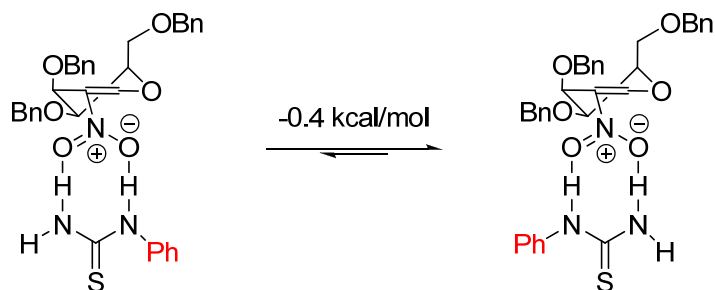

Calculation 3:

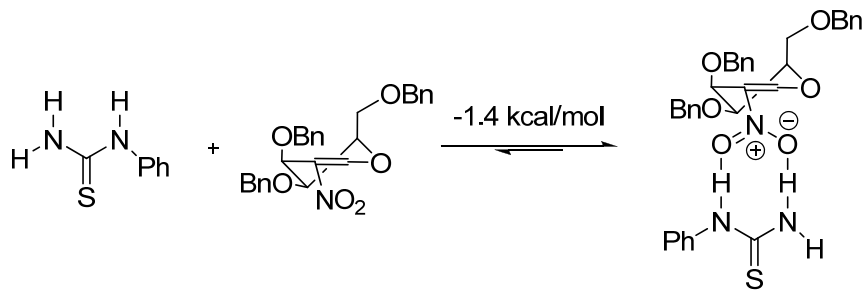

Calculation 4:

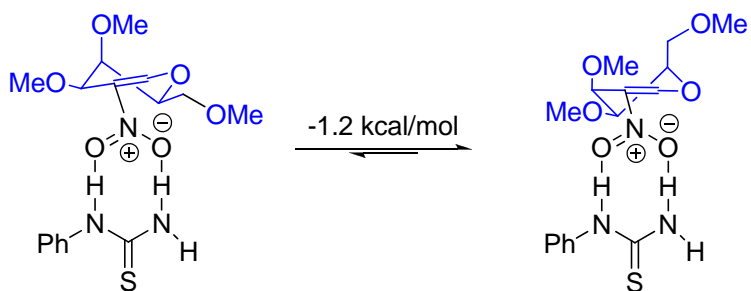

## References

1. J. Das and R. R. Schmidt, *Eur. J. Org. Chem.* 1998, **2**, 1609.
2. Gaussian 09, Revision A.02,  
M. J. Frisch, G. W. Trucks, H. B. Schlegel, G. E. Scuseria, M. A. Robb, J. R. Cheeseman, G. Scalmani, V. Barone, B. Mennucci, G. A. Petersson, H. Nakatsuji, M. Caricato, X. Li, H. P. Hratchian, A. F. Izmaylov, J. Bloino, G. Zheng, J. L. Sonnenberg, M. Hada, M. Ehara, K. Toyota, R. Fukuda, J. Hasegawa, M. Ishida, T. Nakajima, Y. Honda, O. Kitao, H. Nakai, T. Vreven, J. A. Montgomery, Jr., J. E. Peralta, F. Ogliaro, M. Bearpark, J. J. Heyd, E. Brothers, K. N. Kudin, V. N. Staroverov, R. Kobayashi, J. Normand, K. Raghavachari, A. Rendell, J. C. Burant, S. S. Iyengar, J. Tomasi, M. Cossi, N. Rega, J. M. Millam, M. Klene, J. E. Knox, J. B. Cross, V. Bakken, C. Adamo, J. Jaramillo, R. Gomperts, R. E. Stratmann, O. Yazyev, A. J. Austin, R. Cammi, C. Pomelli, J. W. Ochterski, R. L. Martin, K. Morokuma, V. G. Zakrzewski, G. A. Voth, P. Salvador, J. J. Dannenberg, S. Dapprich, A. D. Daniels, O. Farkas, J. B. Foresman, J. V. Ortiz, J. Cioslowski, and D. J. Fox, Gaussian, Inc., Wallingford CT, 2009.

Compound 3a, 400 MHz, CDCl<sub>3</sub>, 1H NMR

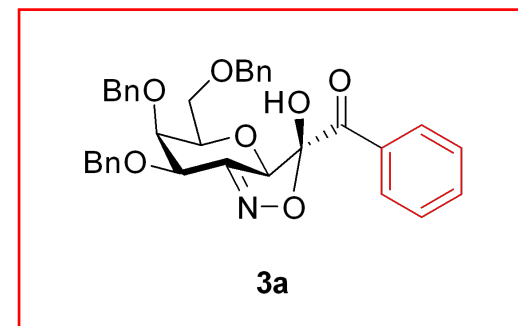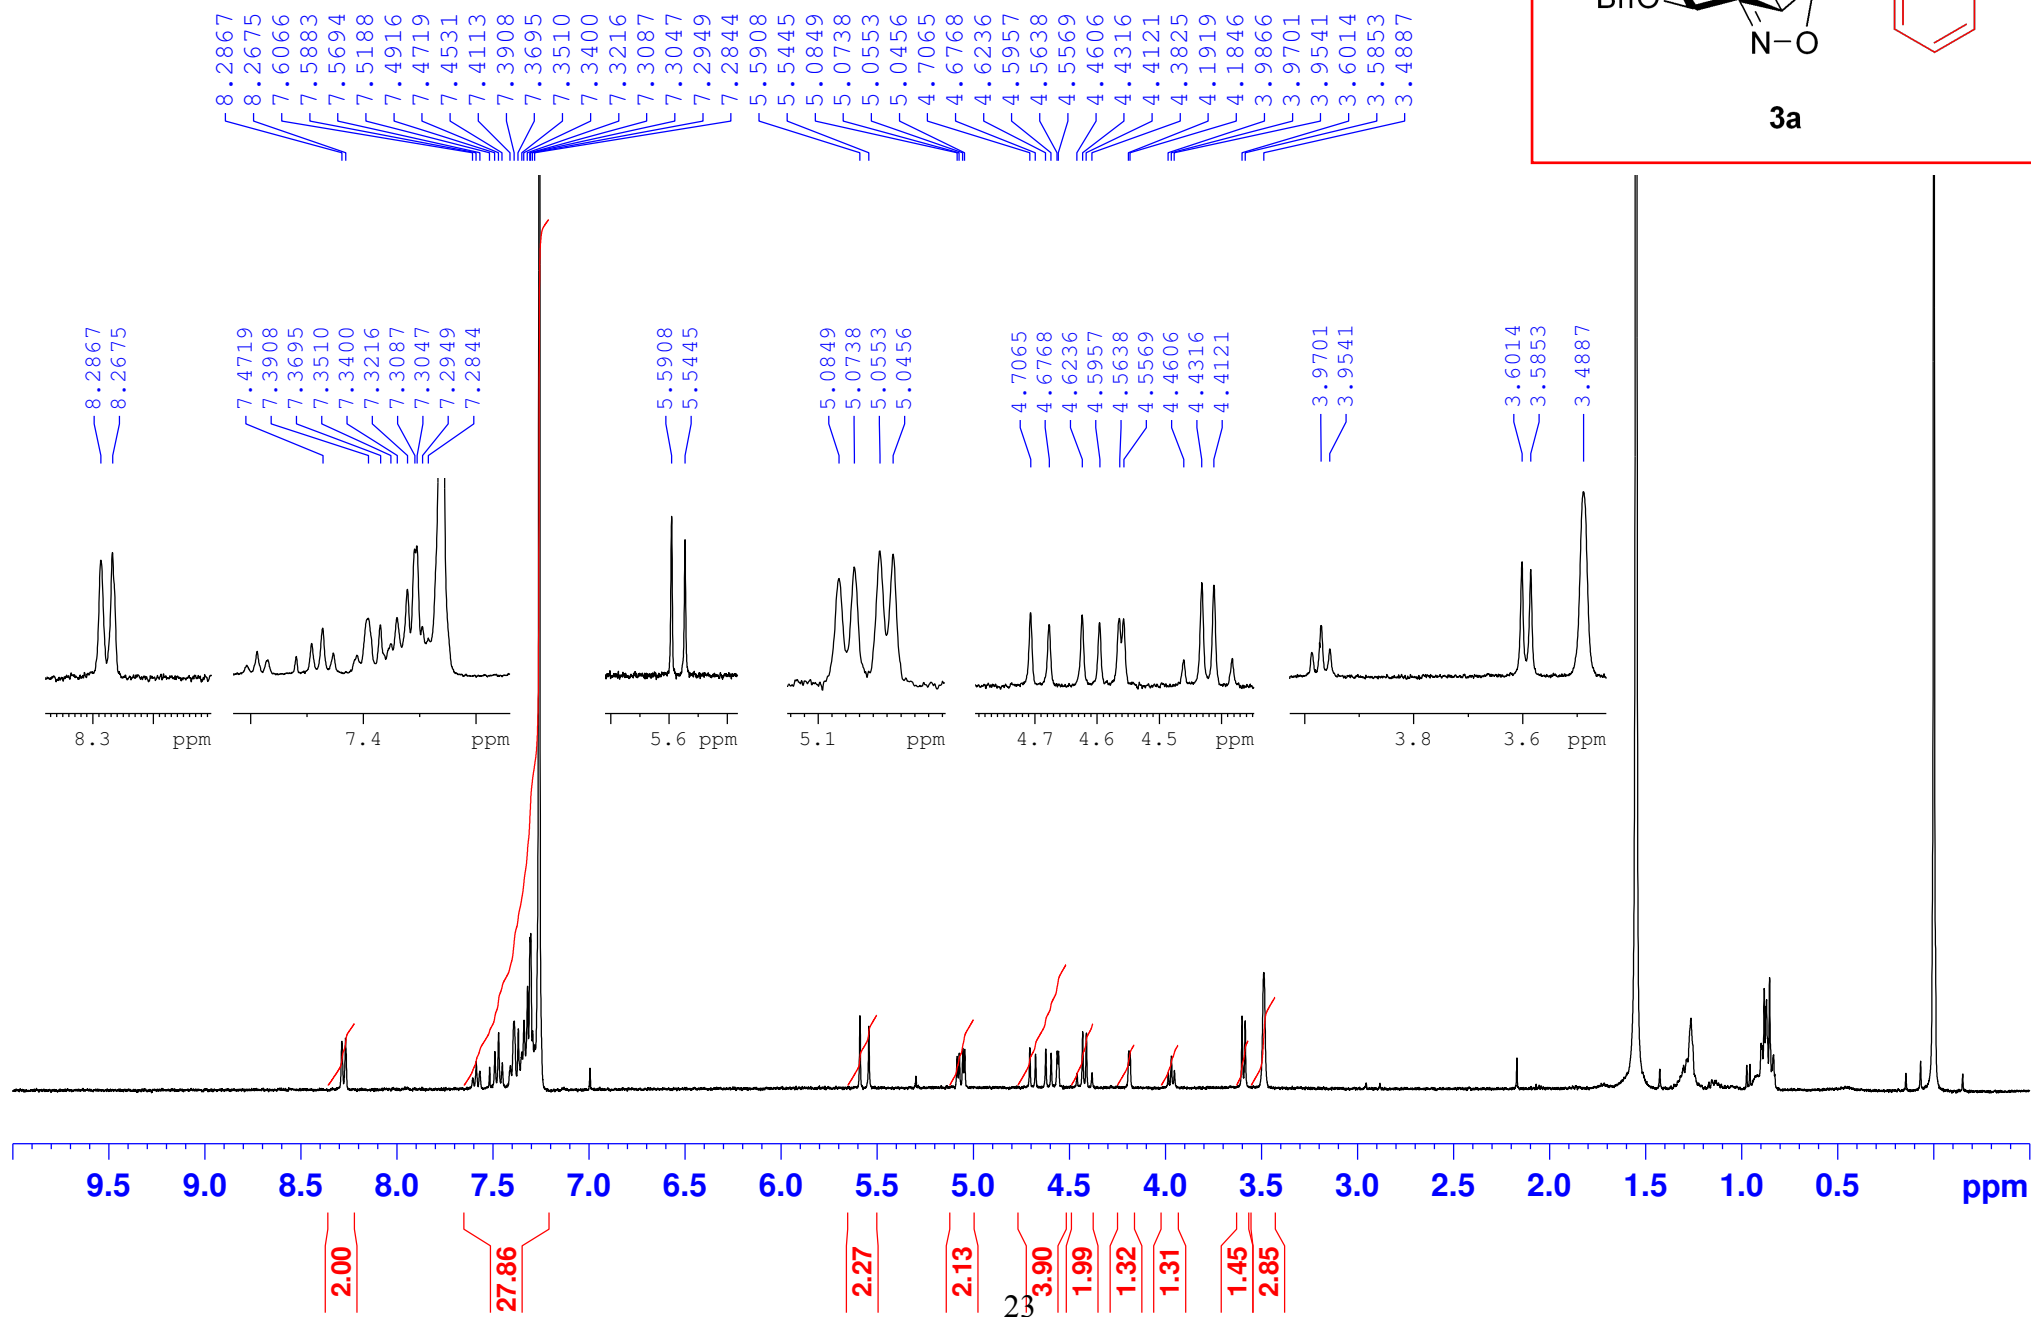

Compound 3a, <sup>13</sup>C NMR, 400MHz, CDCl<sub>3</sub>

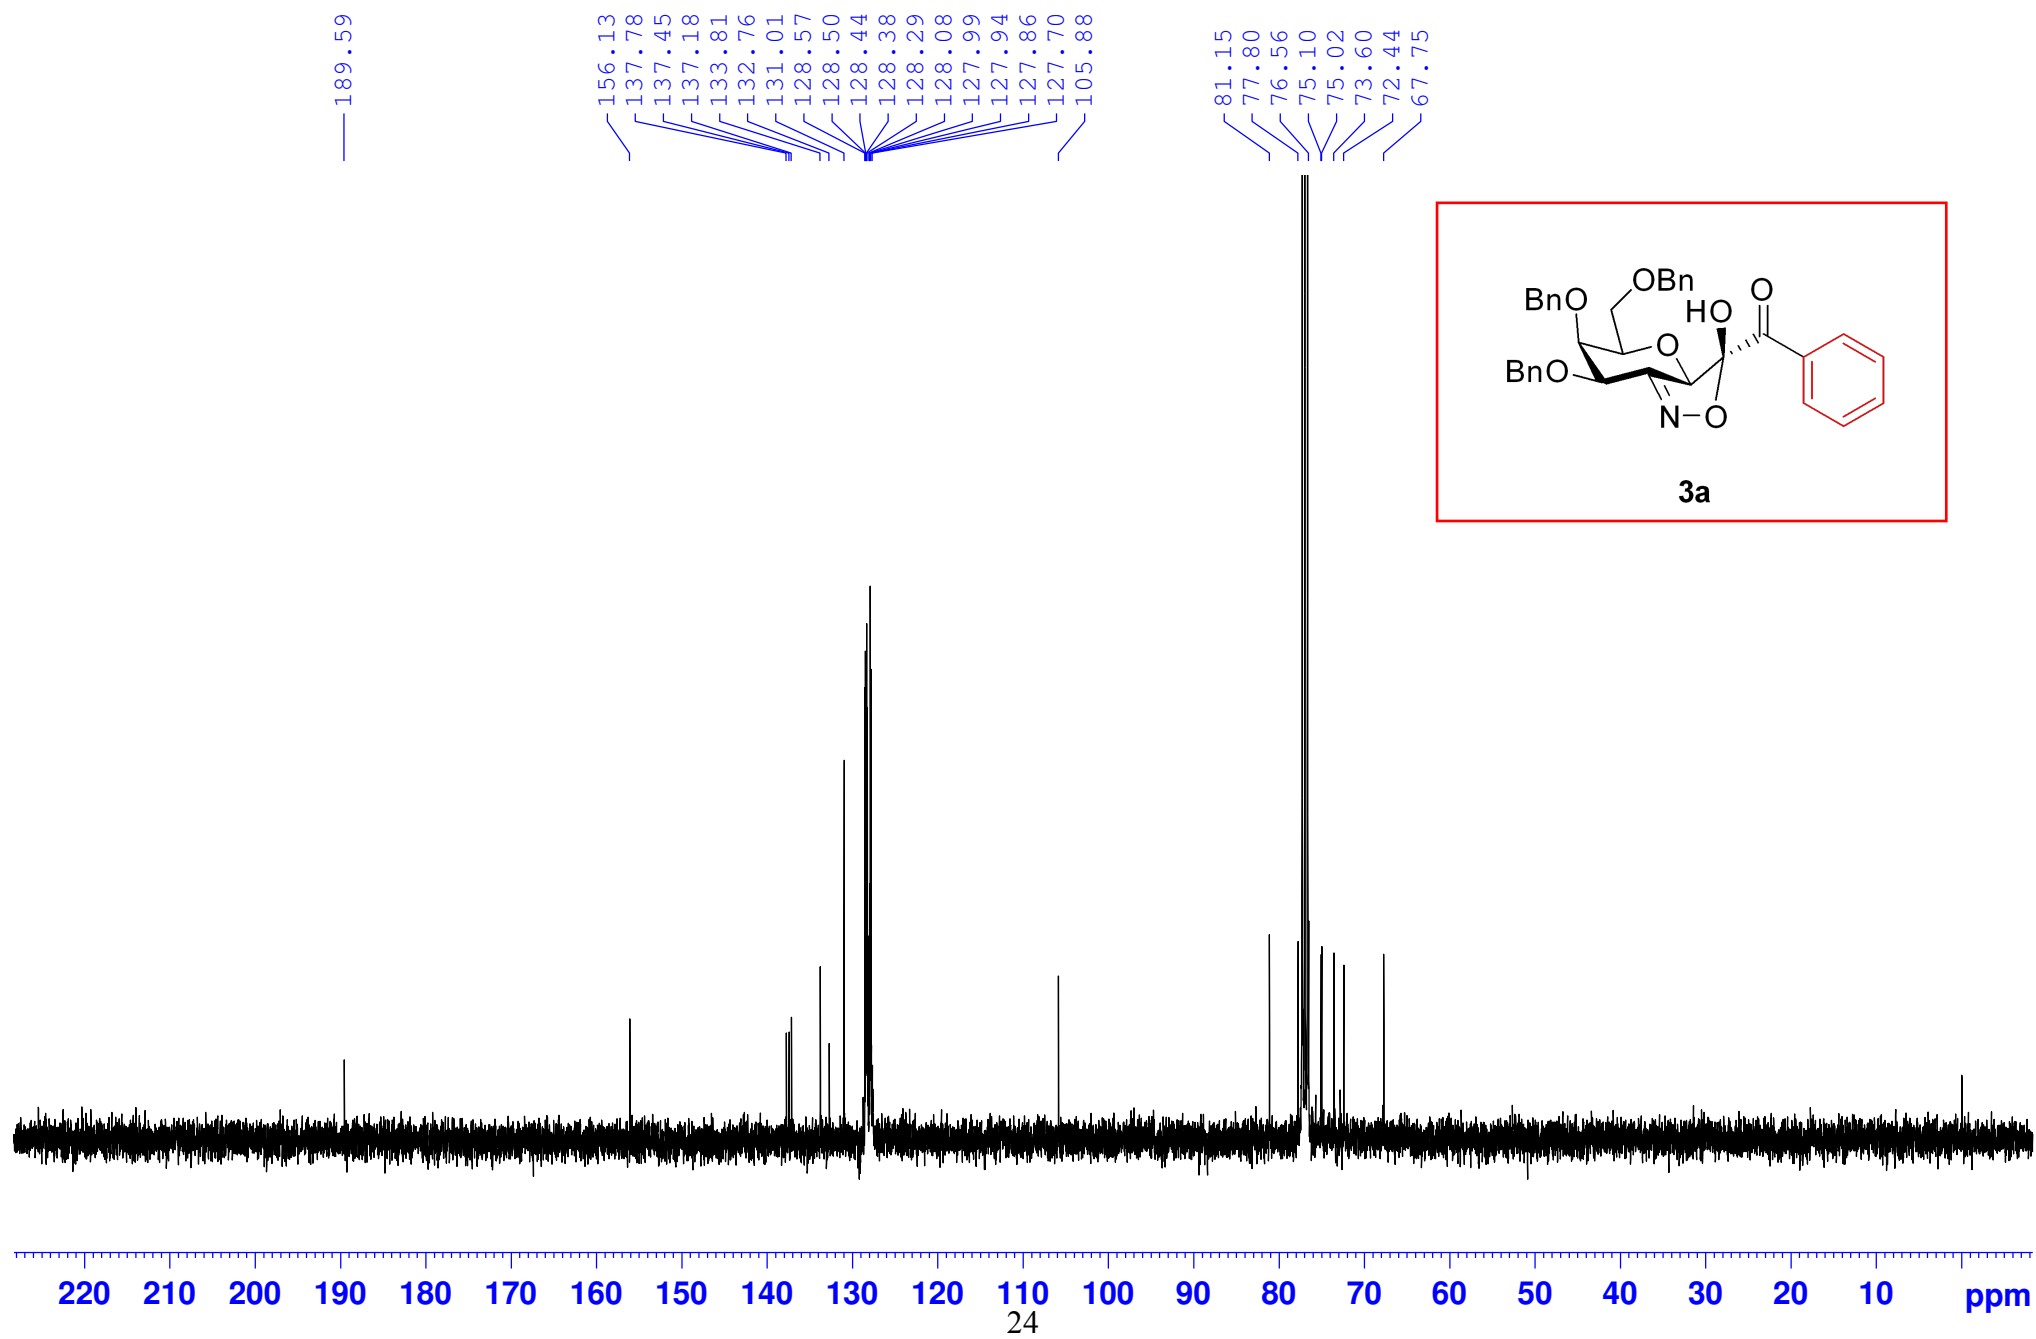



Compound 3b, <sup>1</sup>H NMR, 400MHz, CDCl<sub>3</sub>

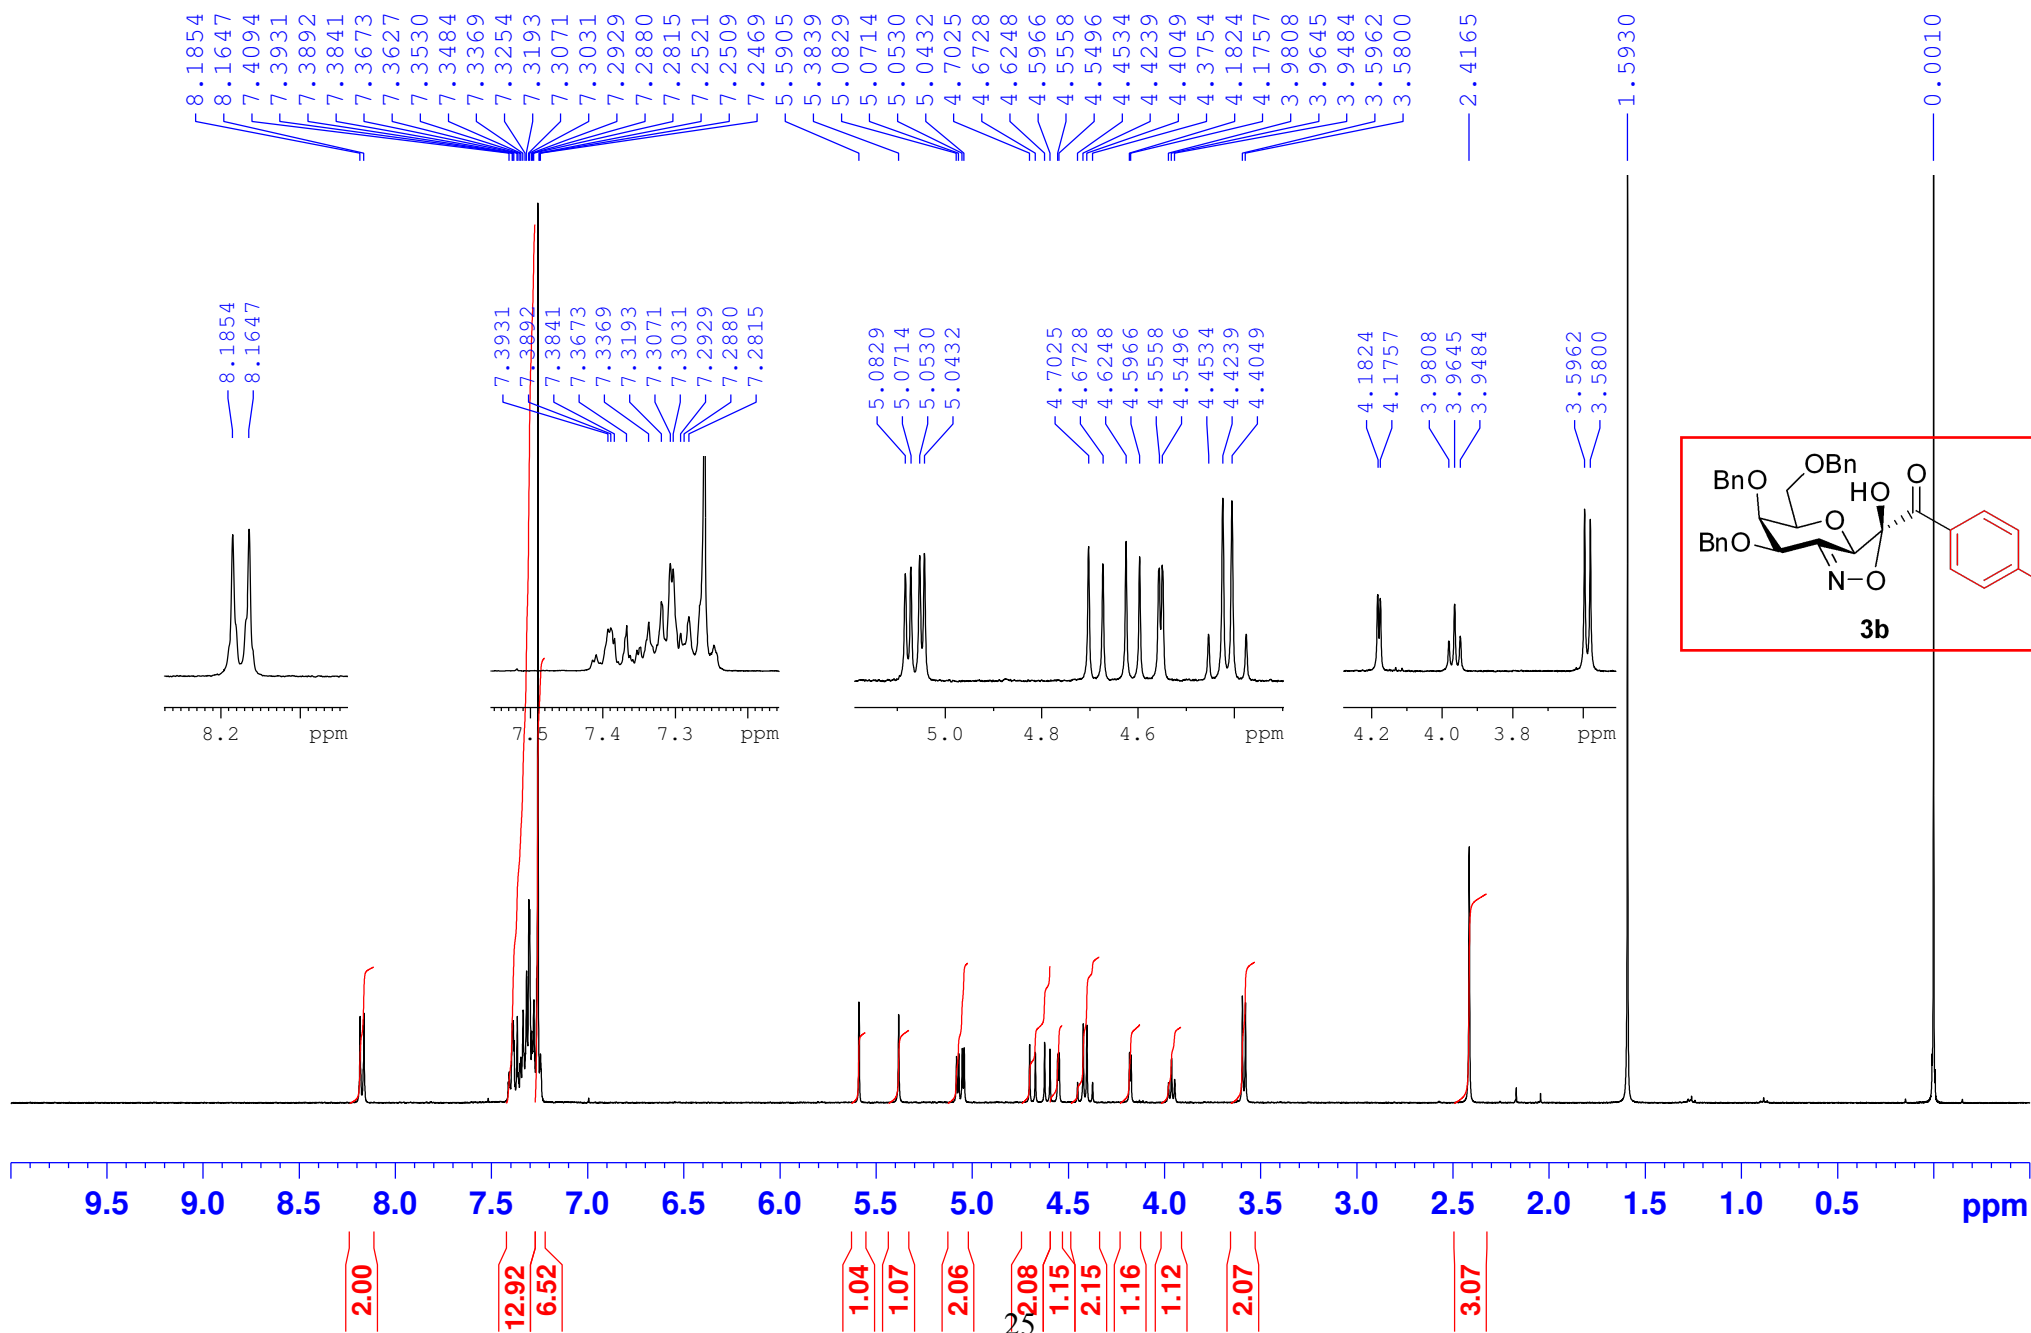

Compound 3b, <sup>13</sup>C NMR, 400MHz, CDCl<sub>3</sub>

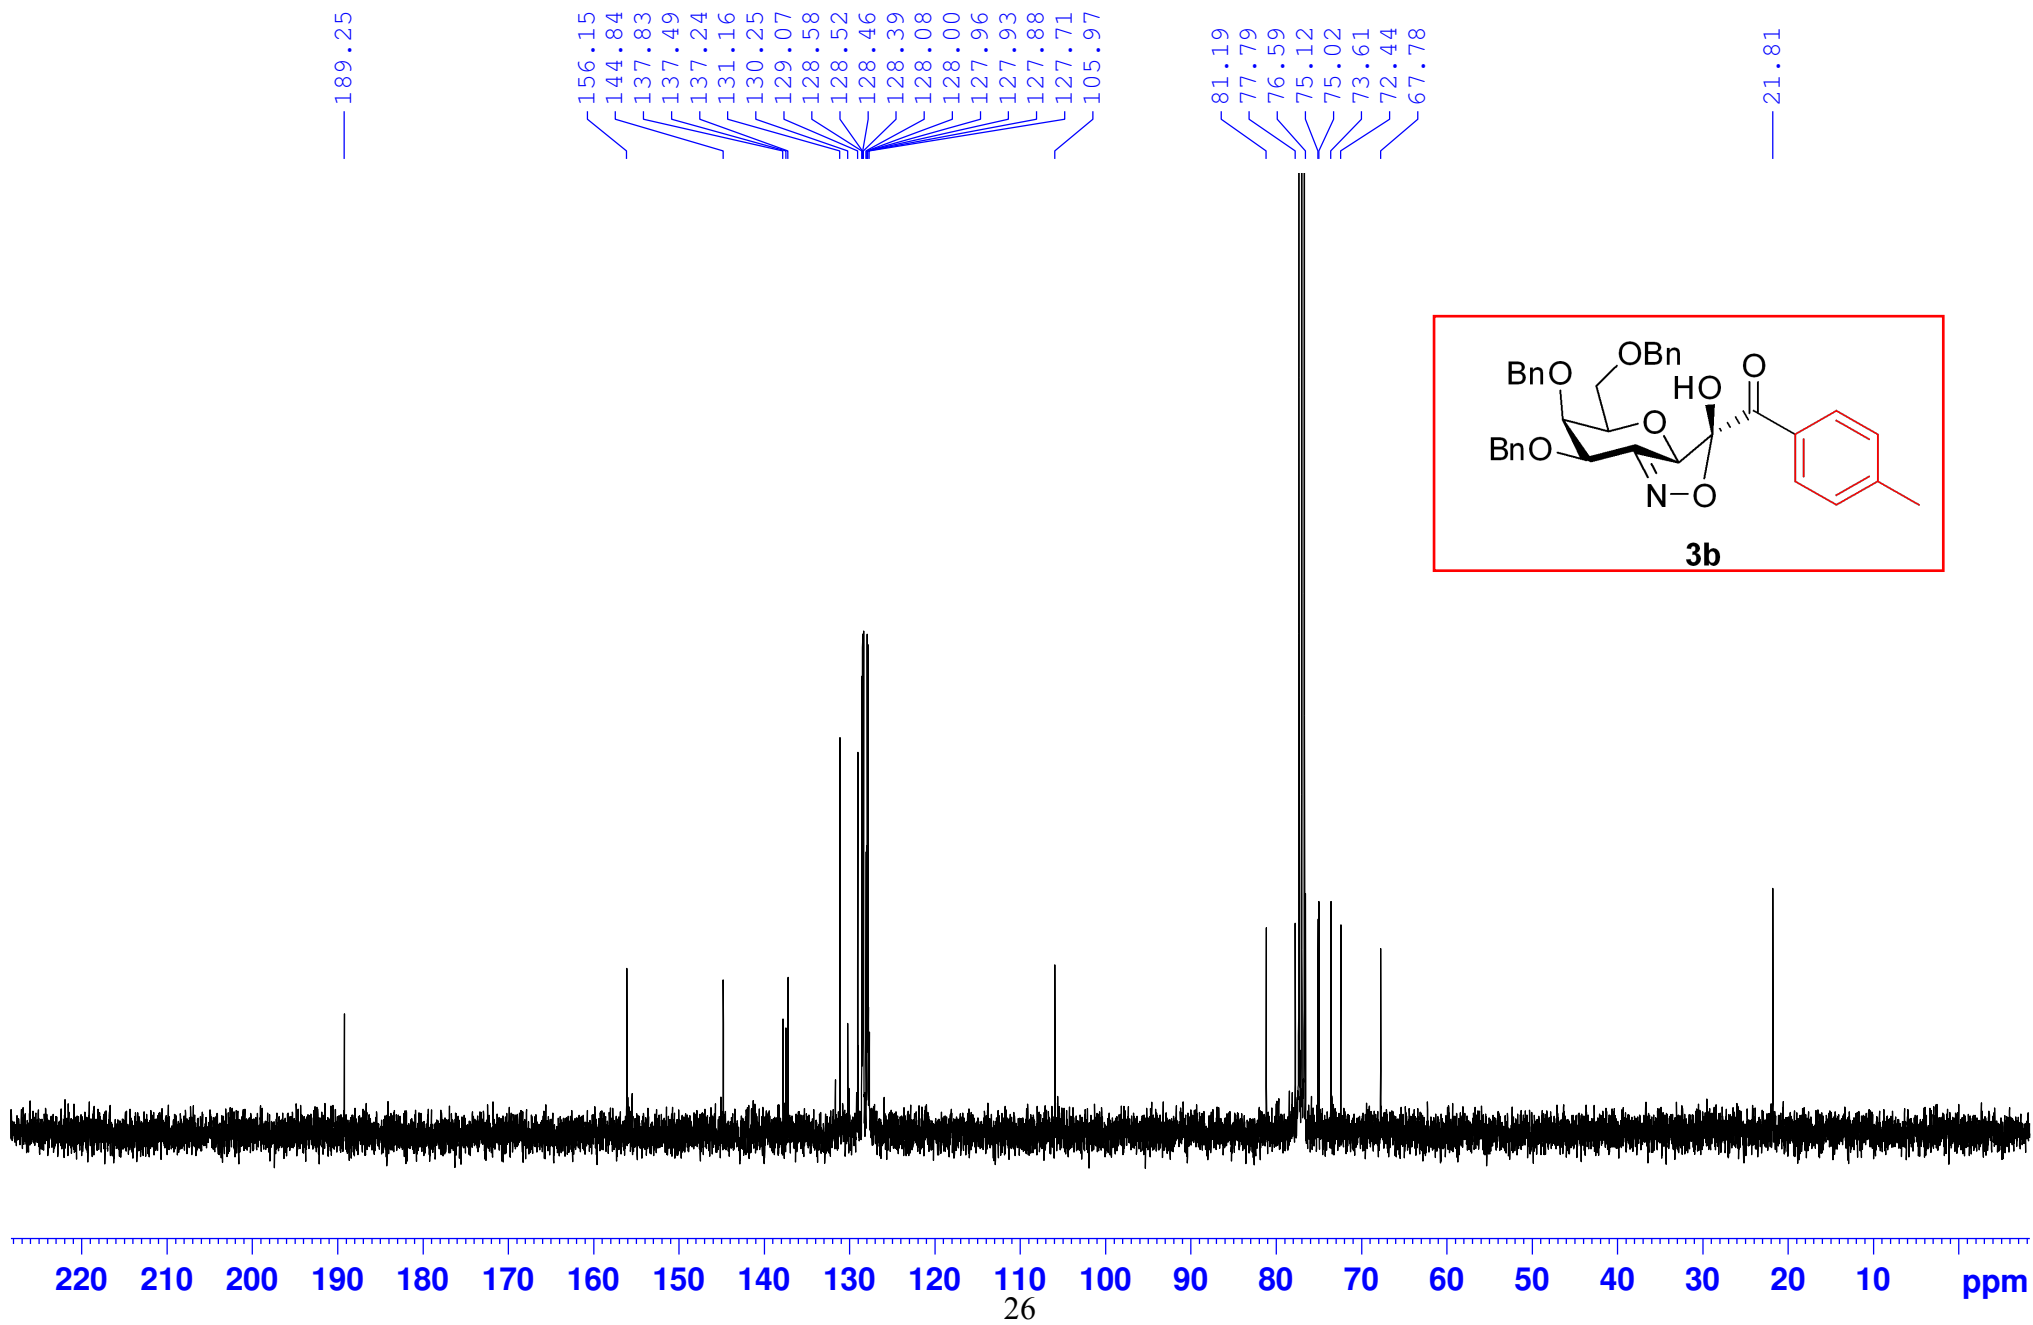

Compound 3c, <sup>1</sup>H NMR, 400MHz, CDCl<sub>3</sub>

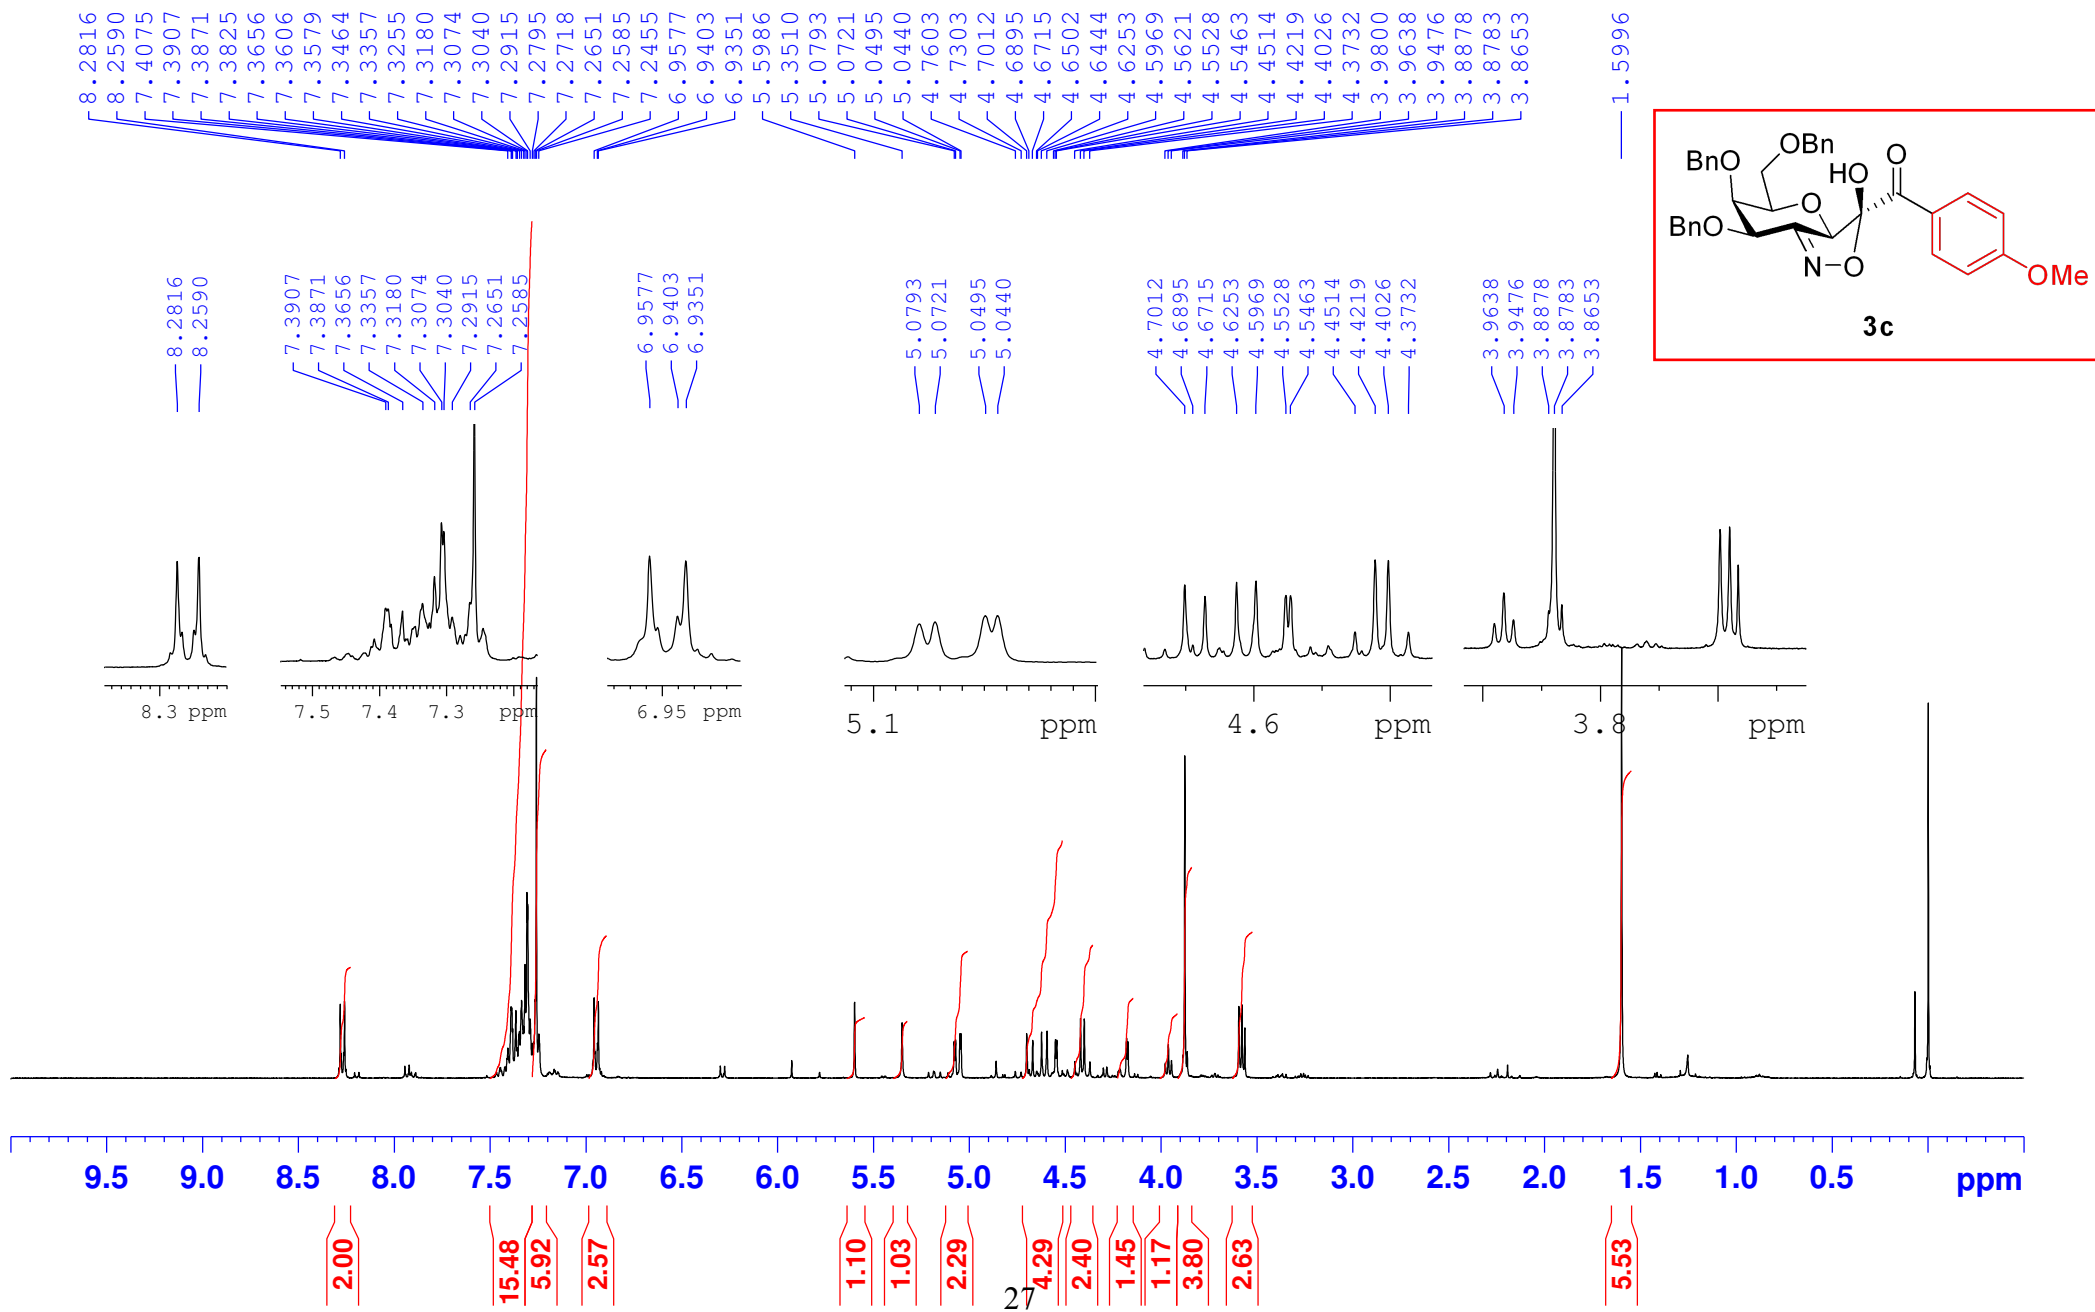

Compound 3c, <sup>13</sup>C NMR, 400MHz, CDCl<sub>3</sub>

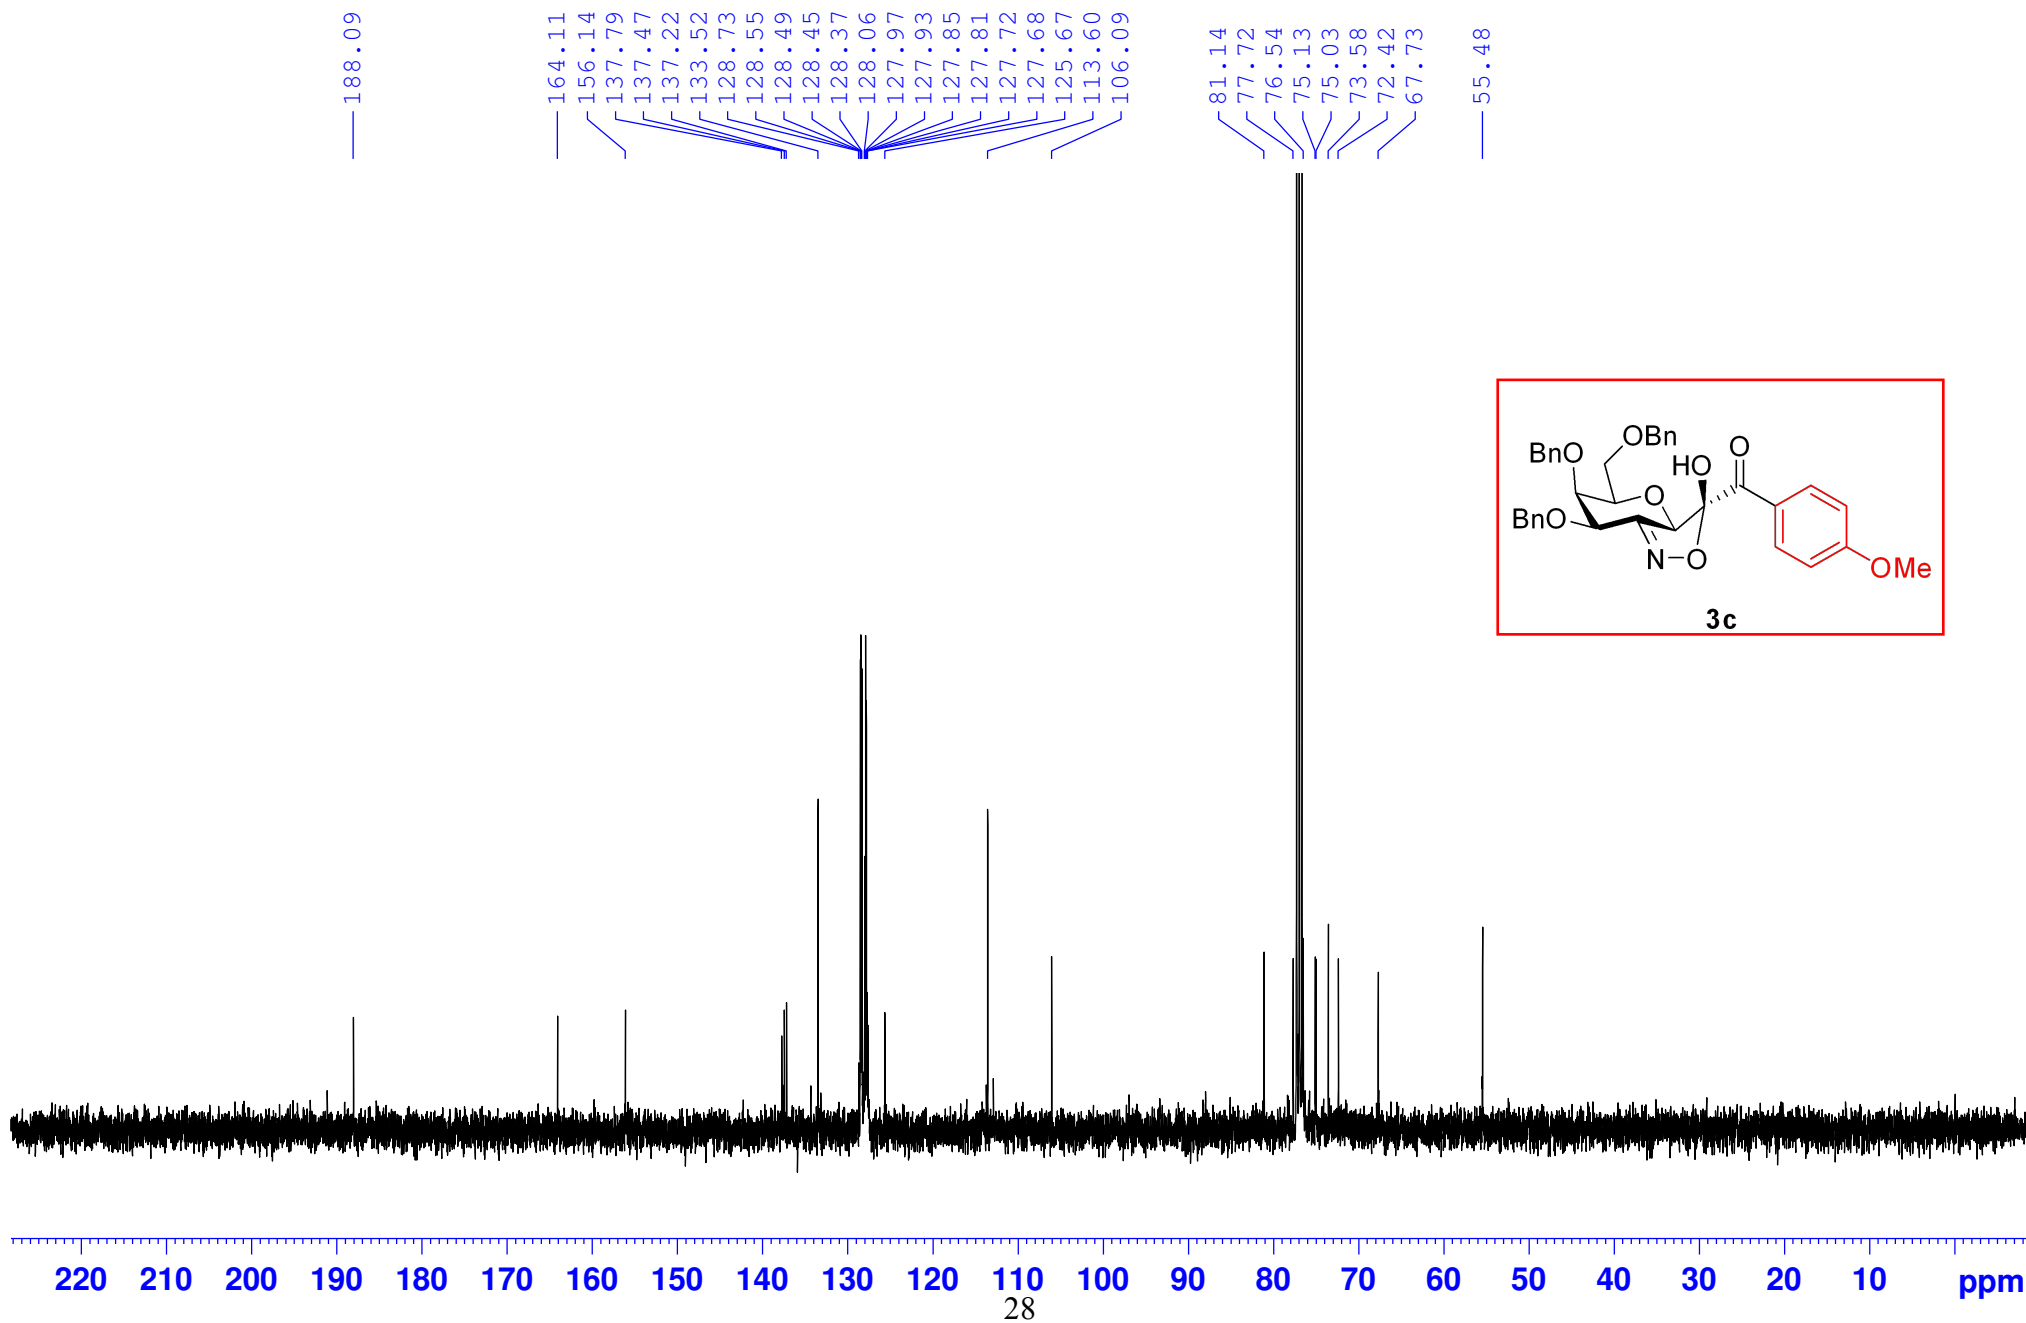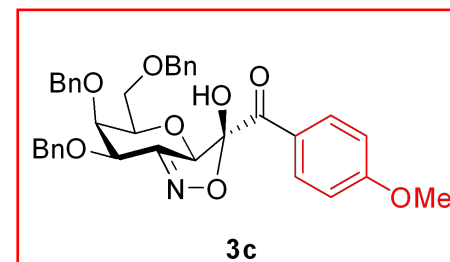

Compound 3d, <sup>1</sup>H NMR, 400MHz, CDCl<sub>3</sub>

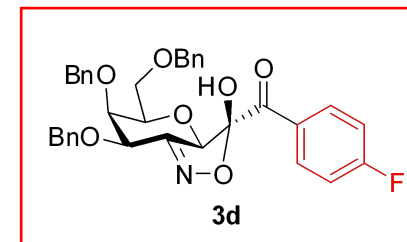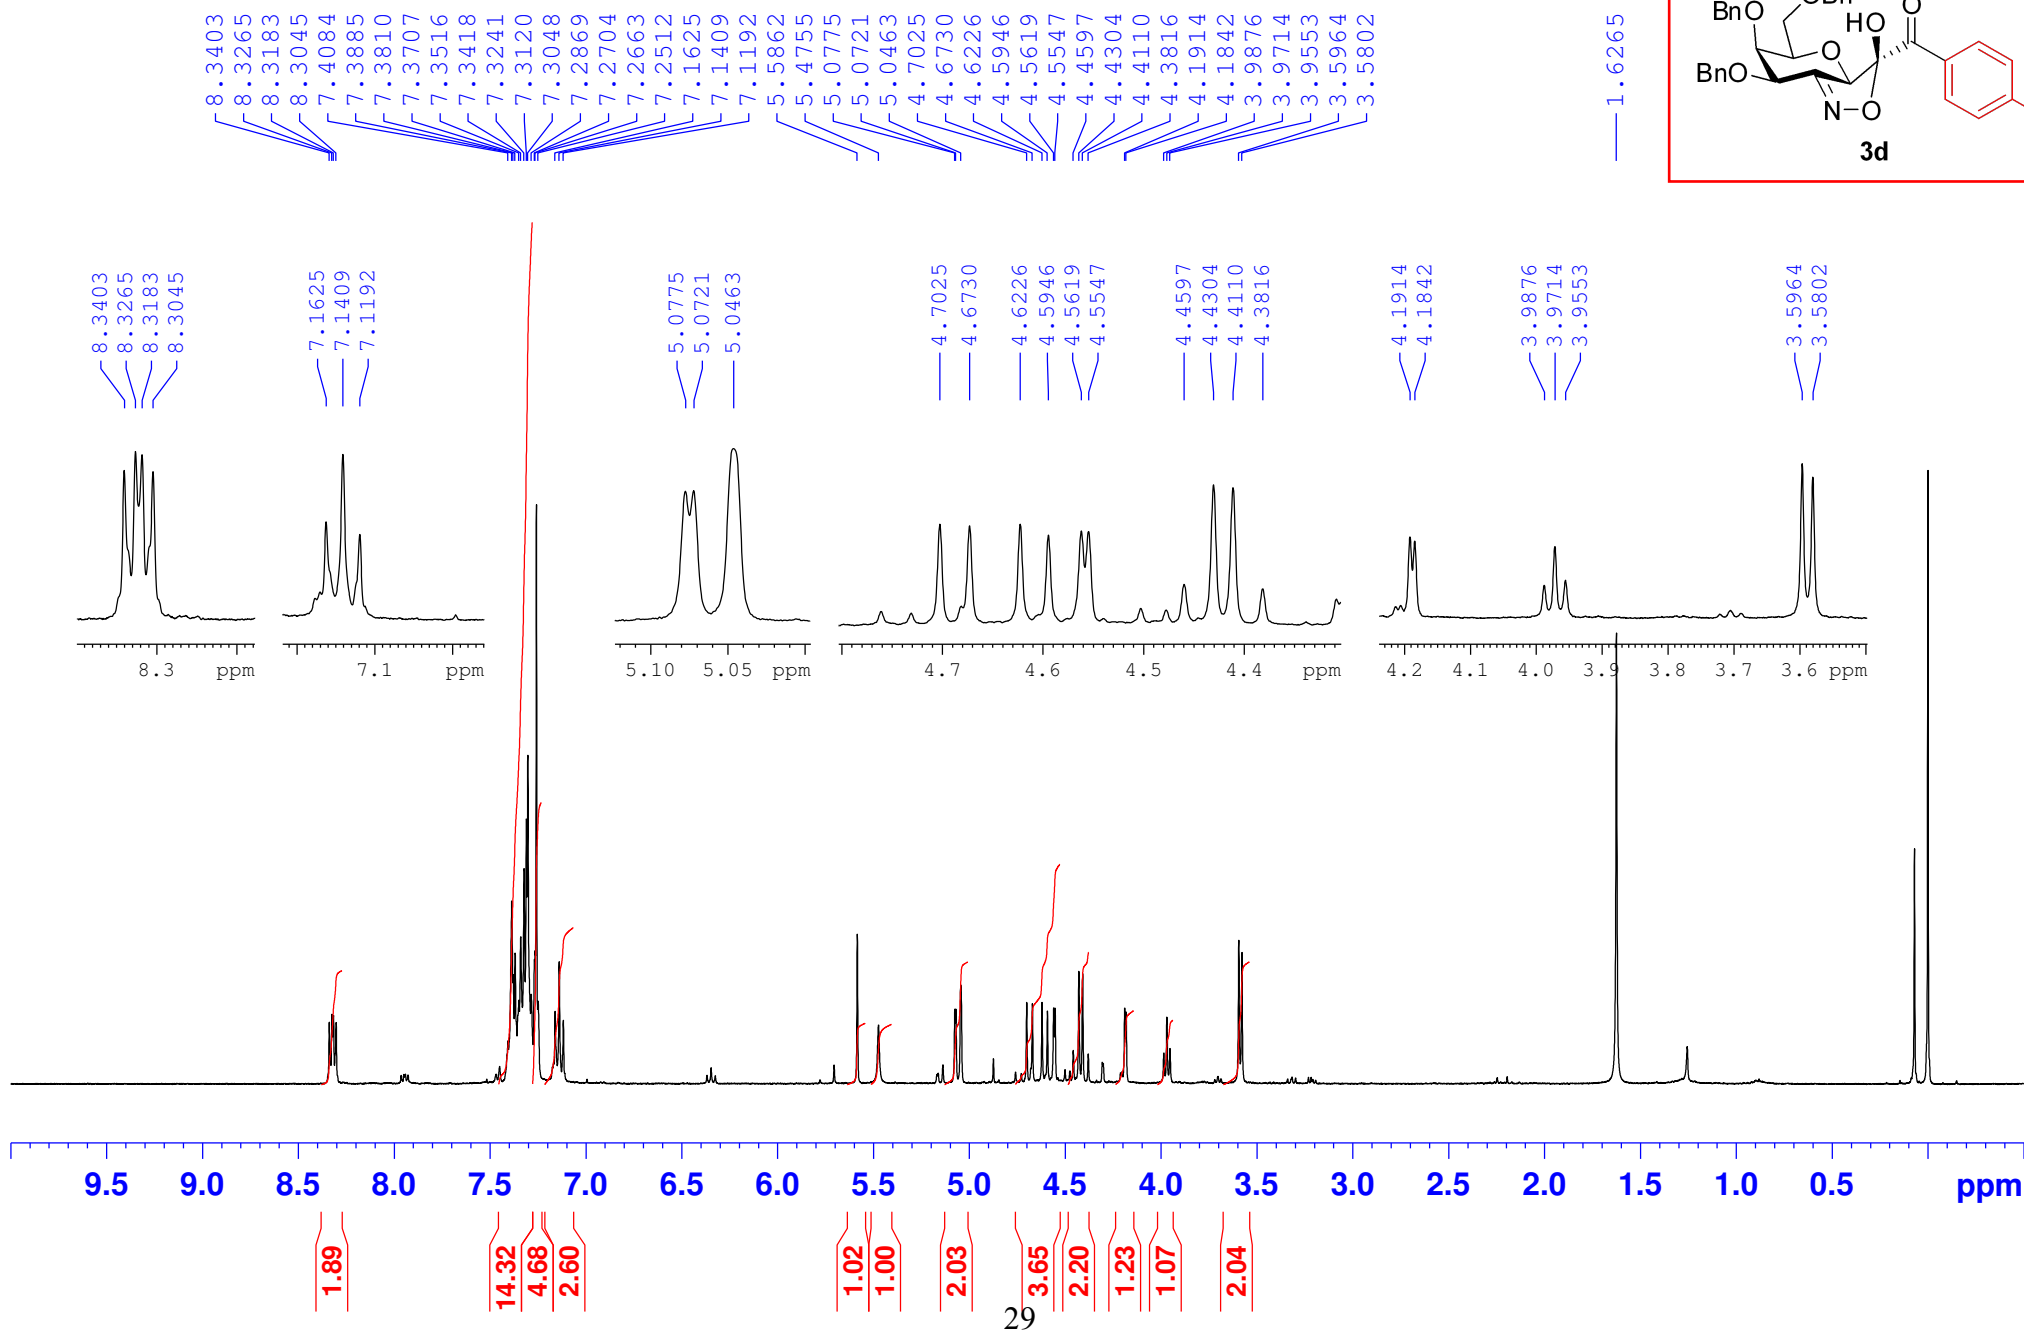

Compound 3d, <sup>13</sup>C NMR, 400 MHz, CDCl<sub>3</sub>

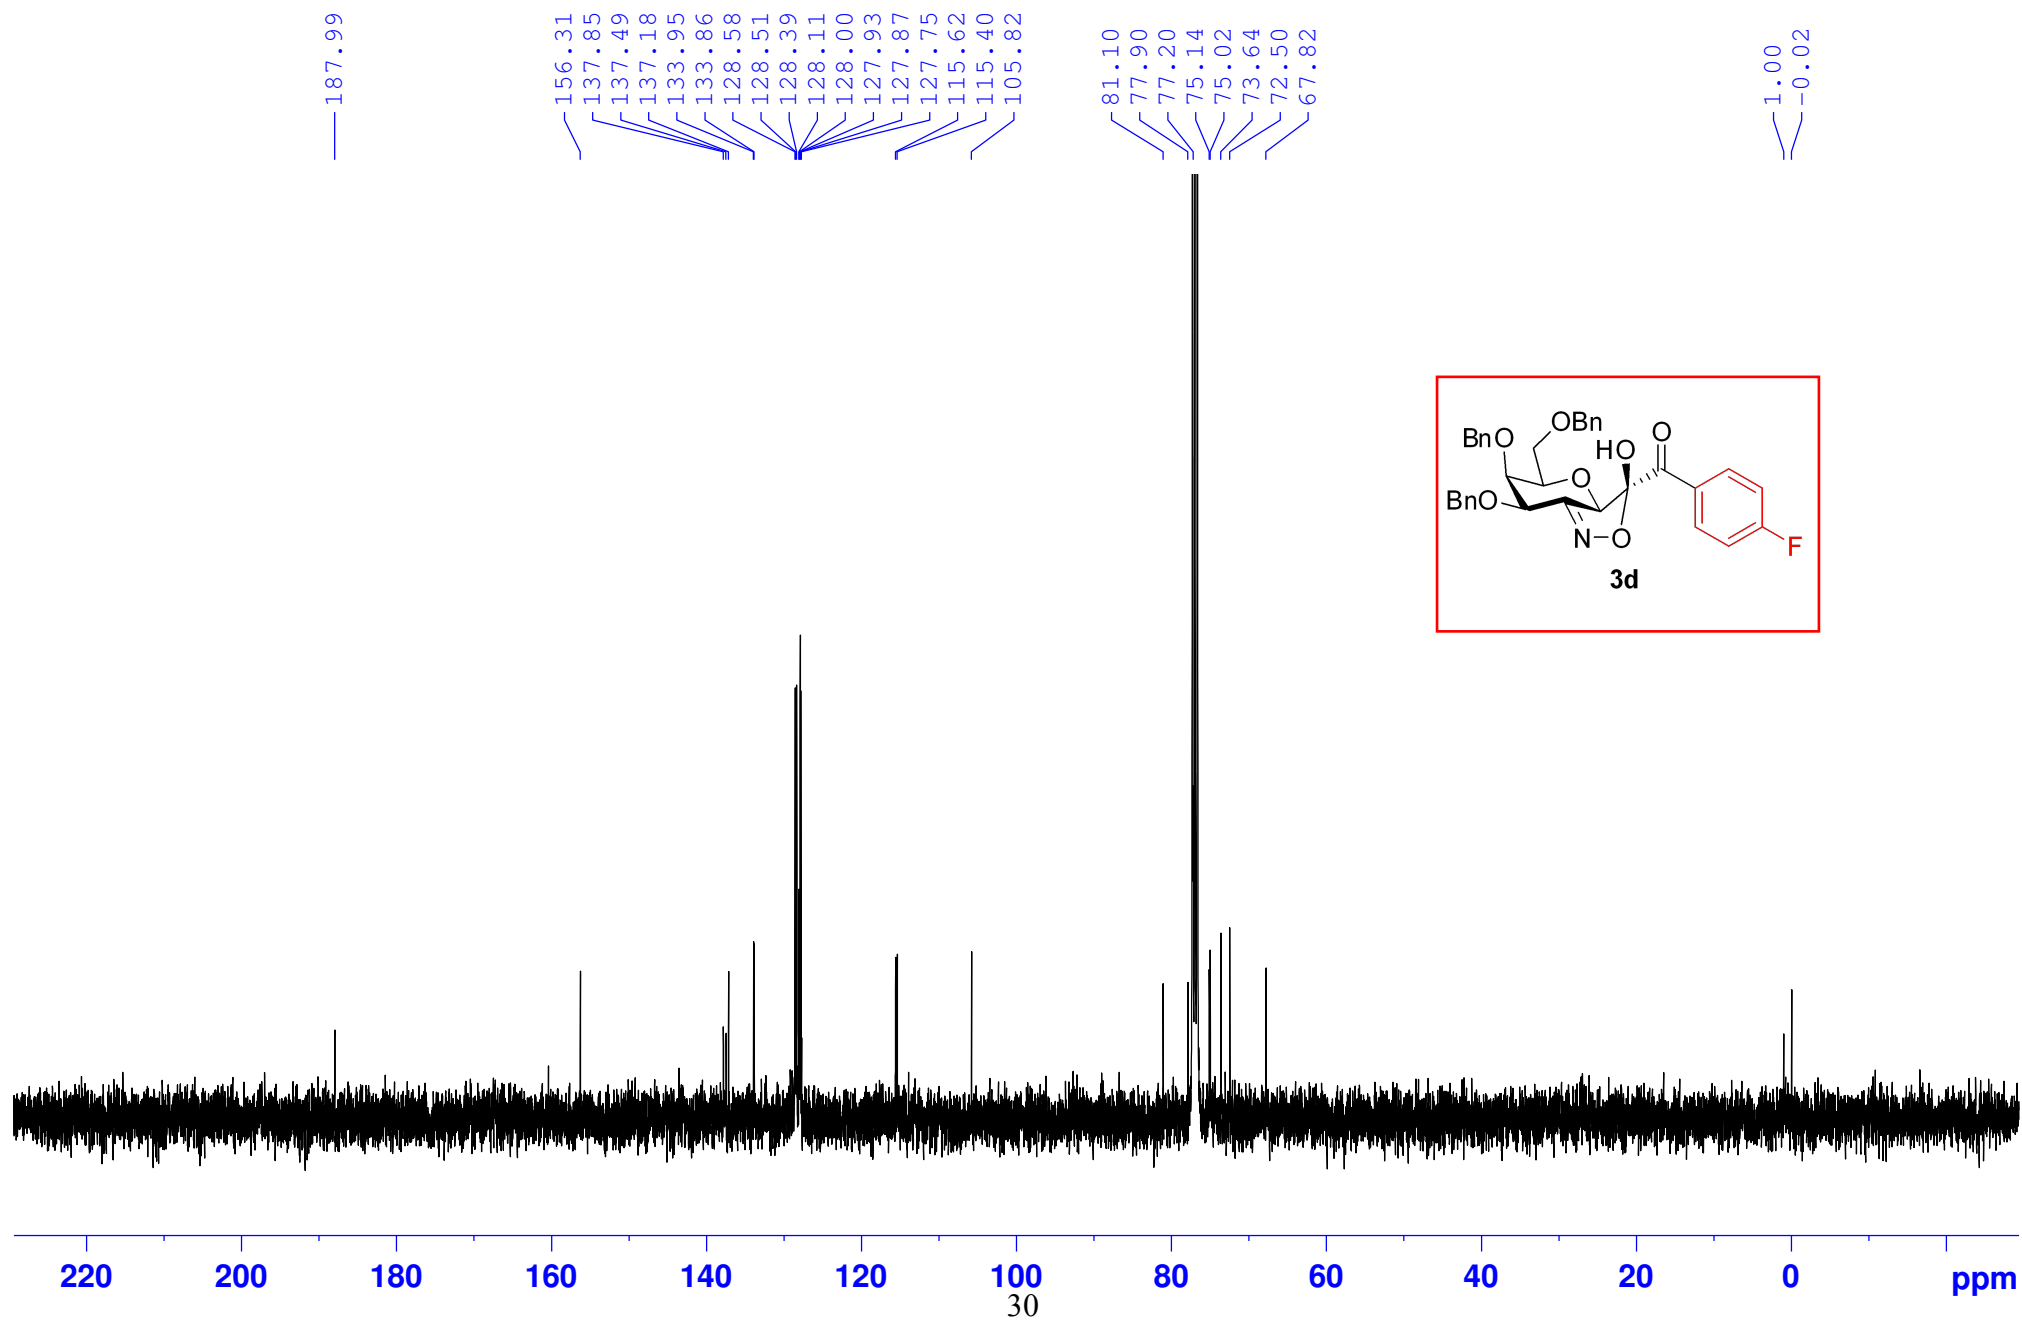

Compound 3e, <sup>1</sup>H NMR, 400MHz, CDCl<sub>3</sub>

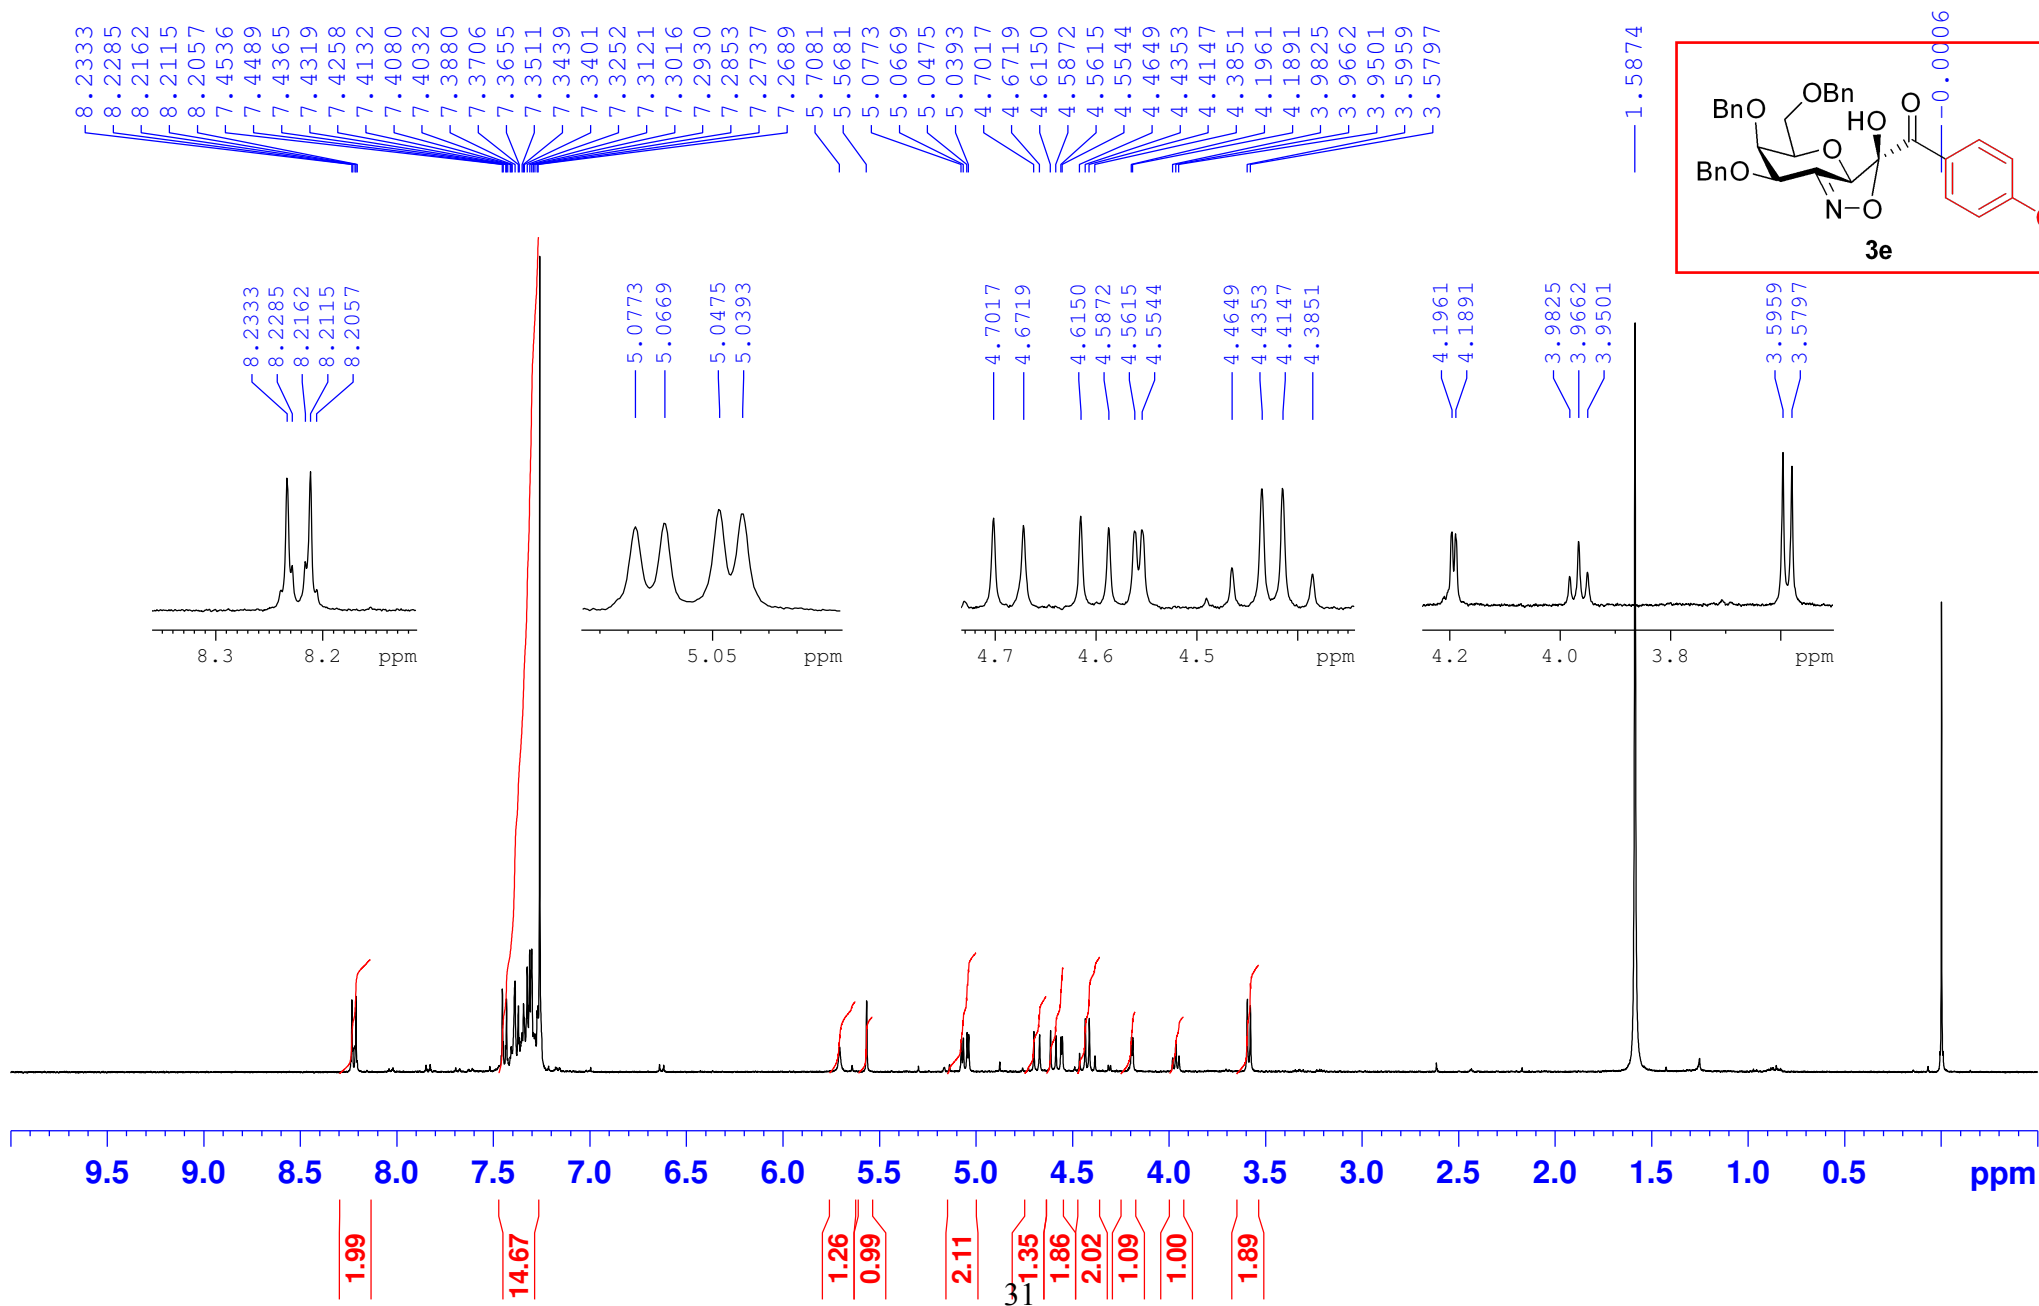

Compound 3e, <sup>13</sup>C NMR, 400 MHz, CDCl<sub>3</sub>

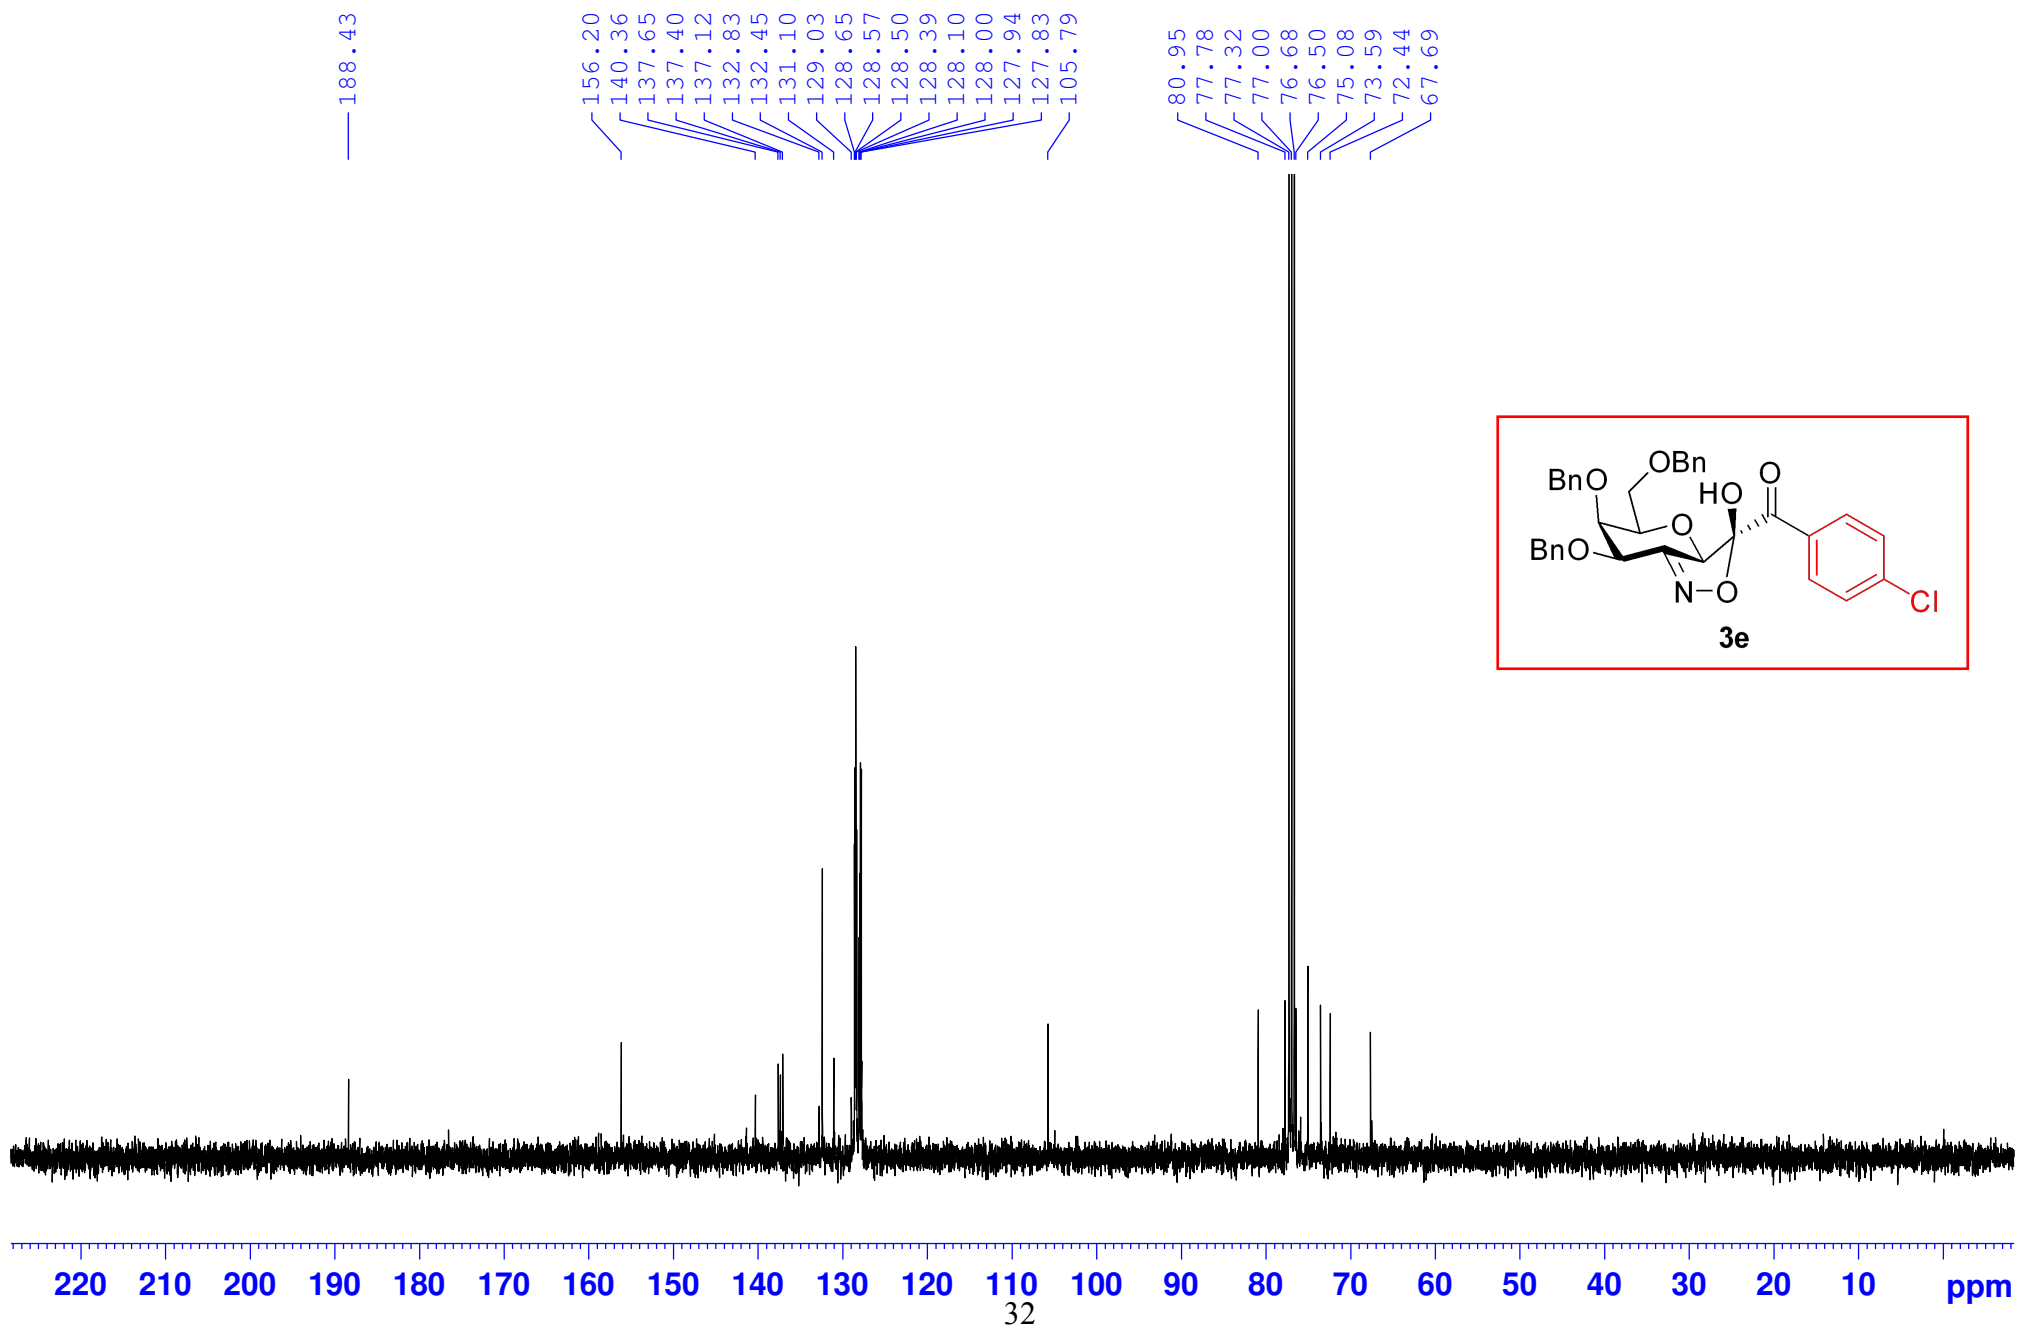



Compound 3f, <sup>1</sup>H NMR, 400MHz, CDCl<sub>3</sub>

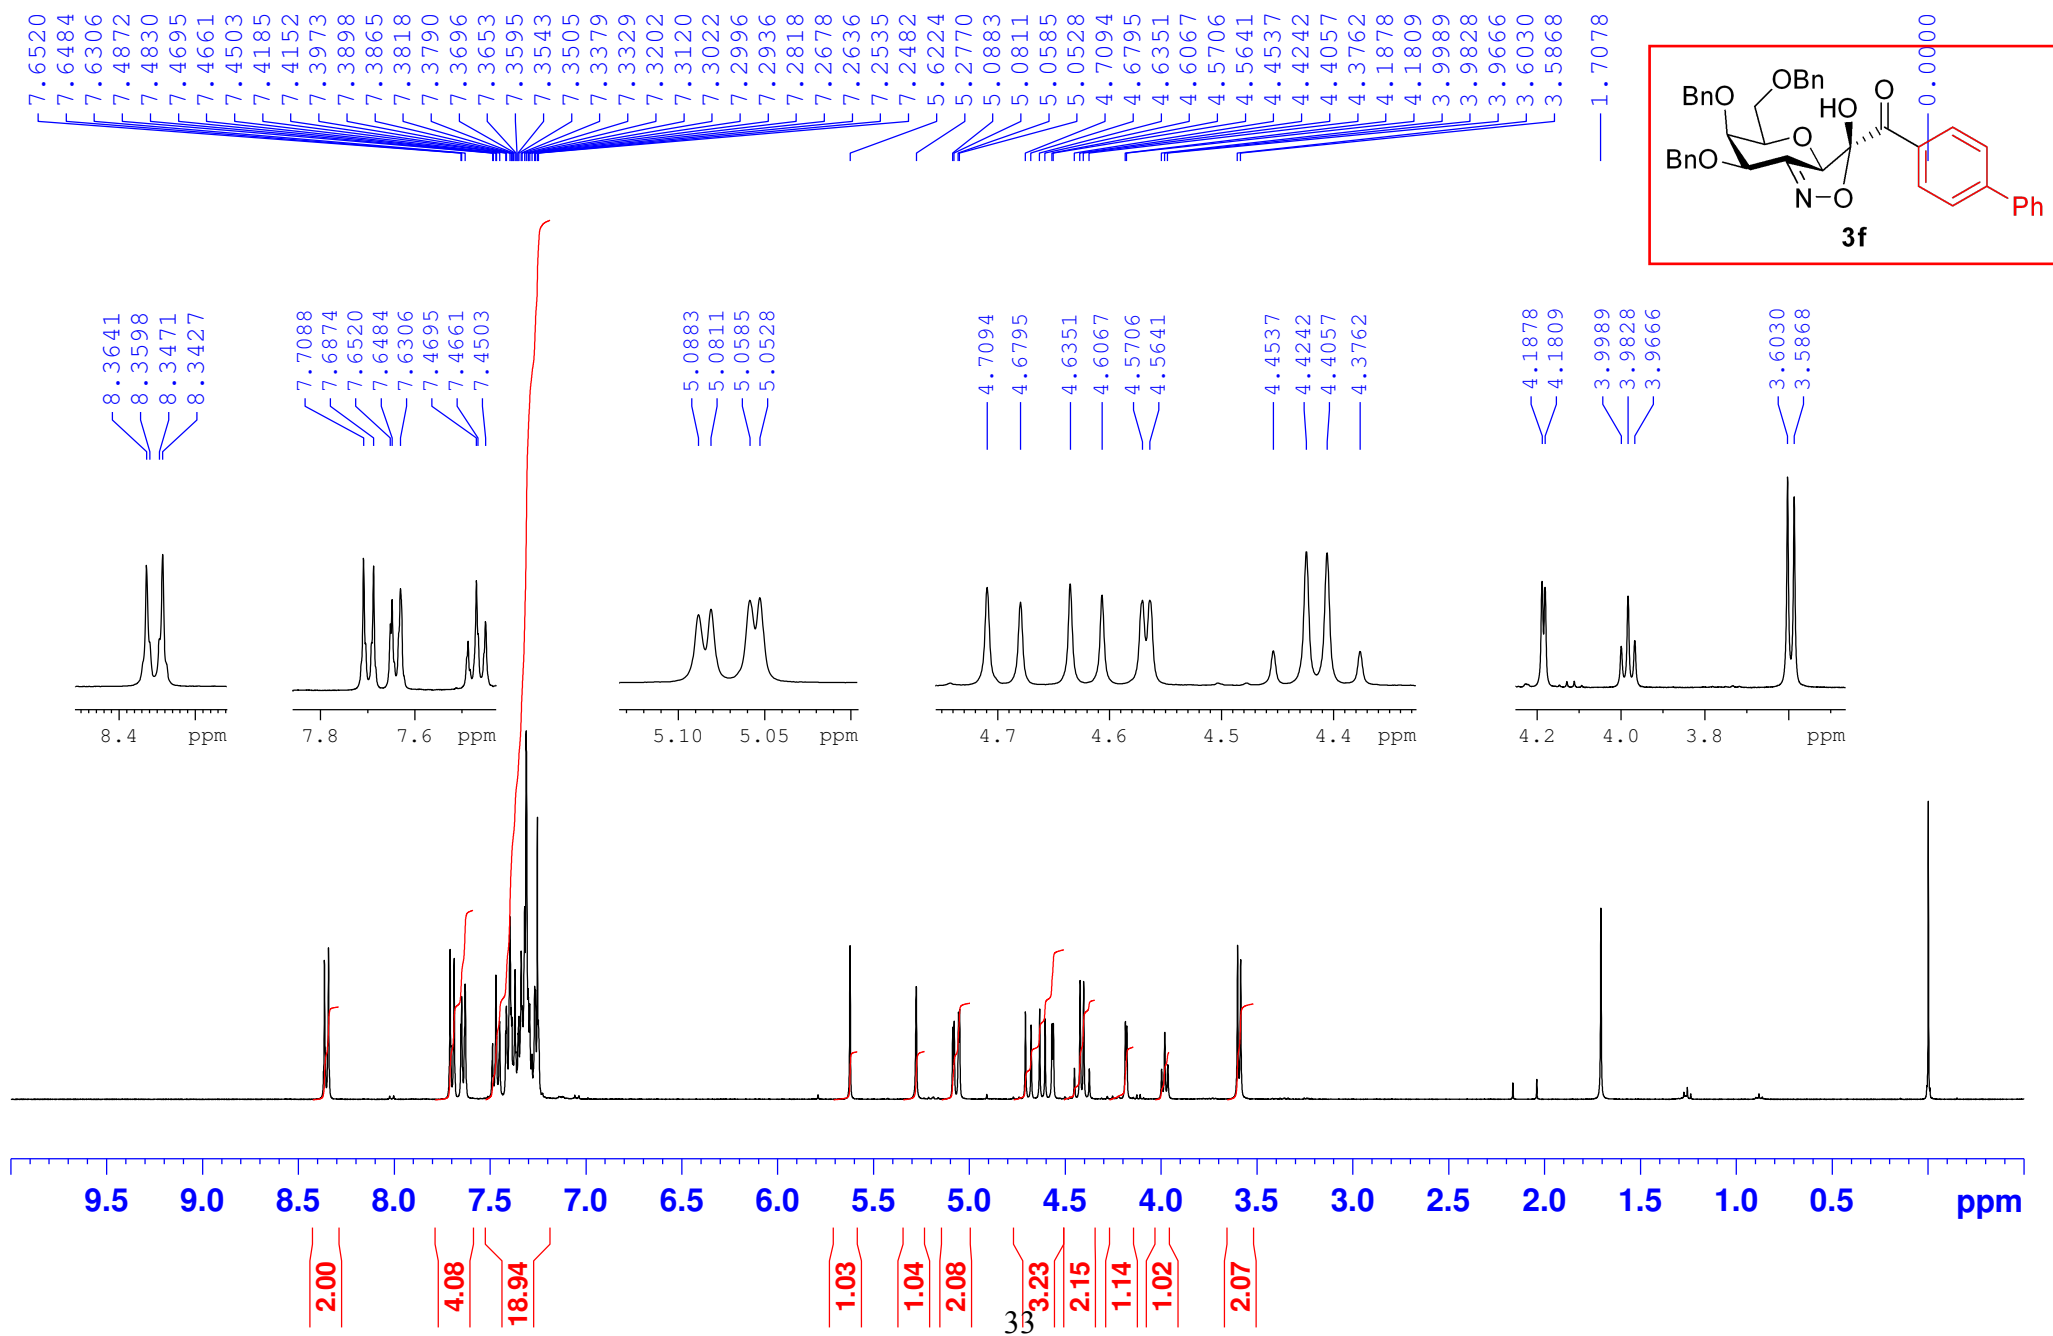

Compound 3f, <sup>13</sup>C NMR, 400MHz, CDCl<sub>3</sub>

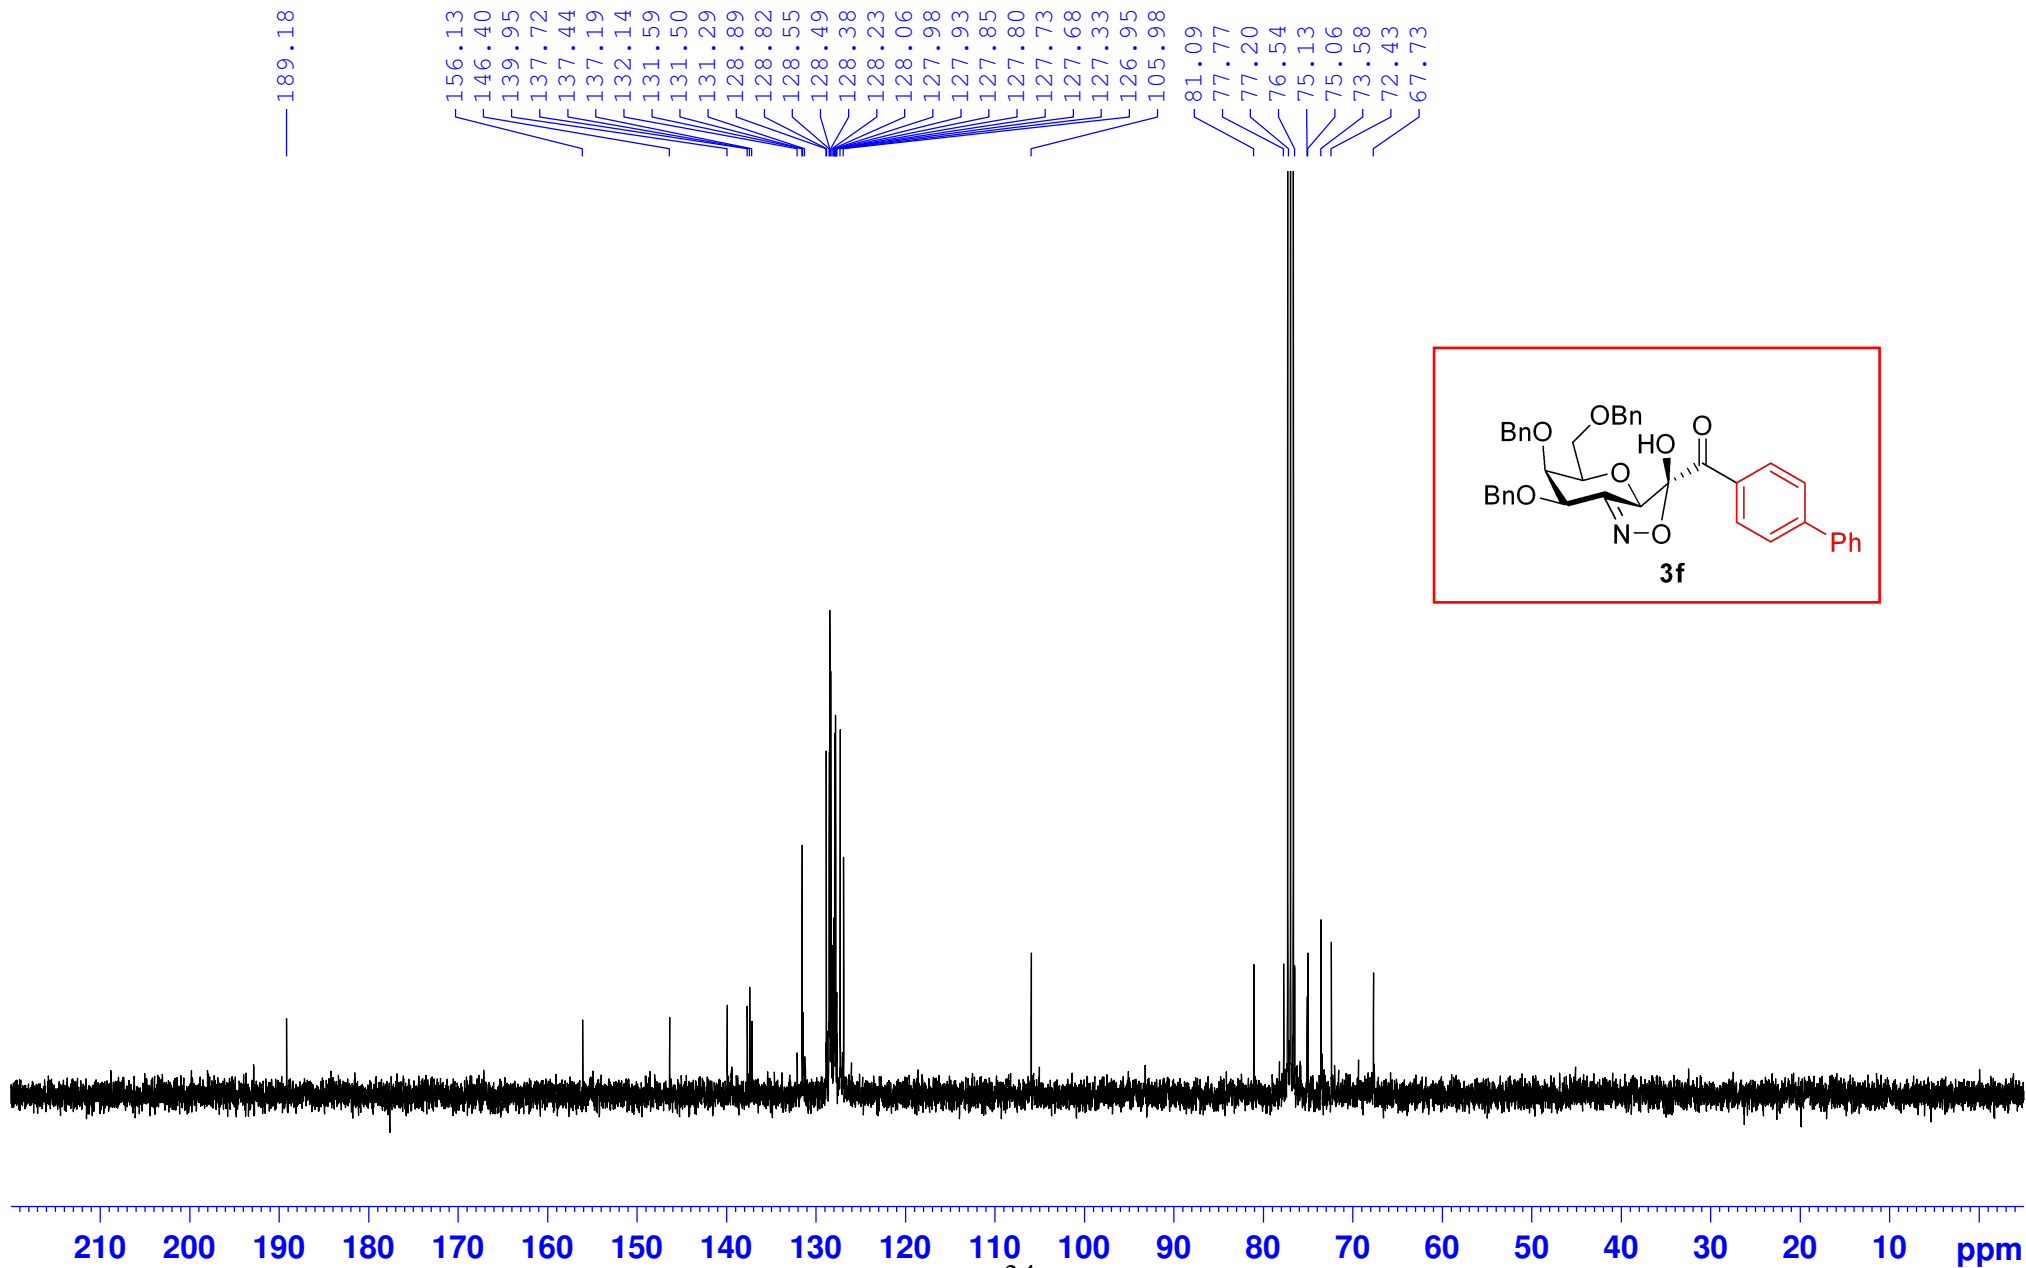

Compound 3g, 400 MHz, CDCl<sub>3</sub>, 1H NMR

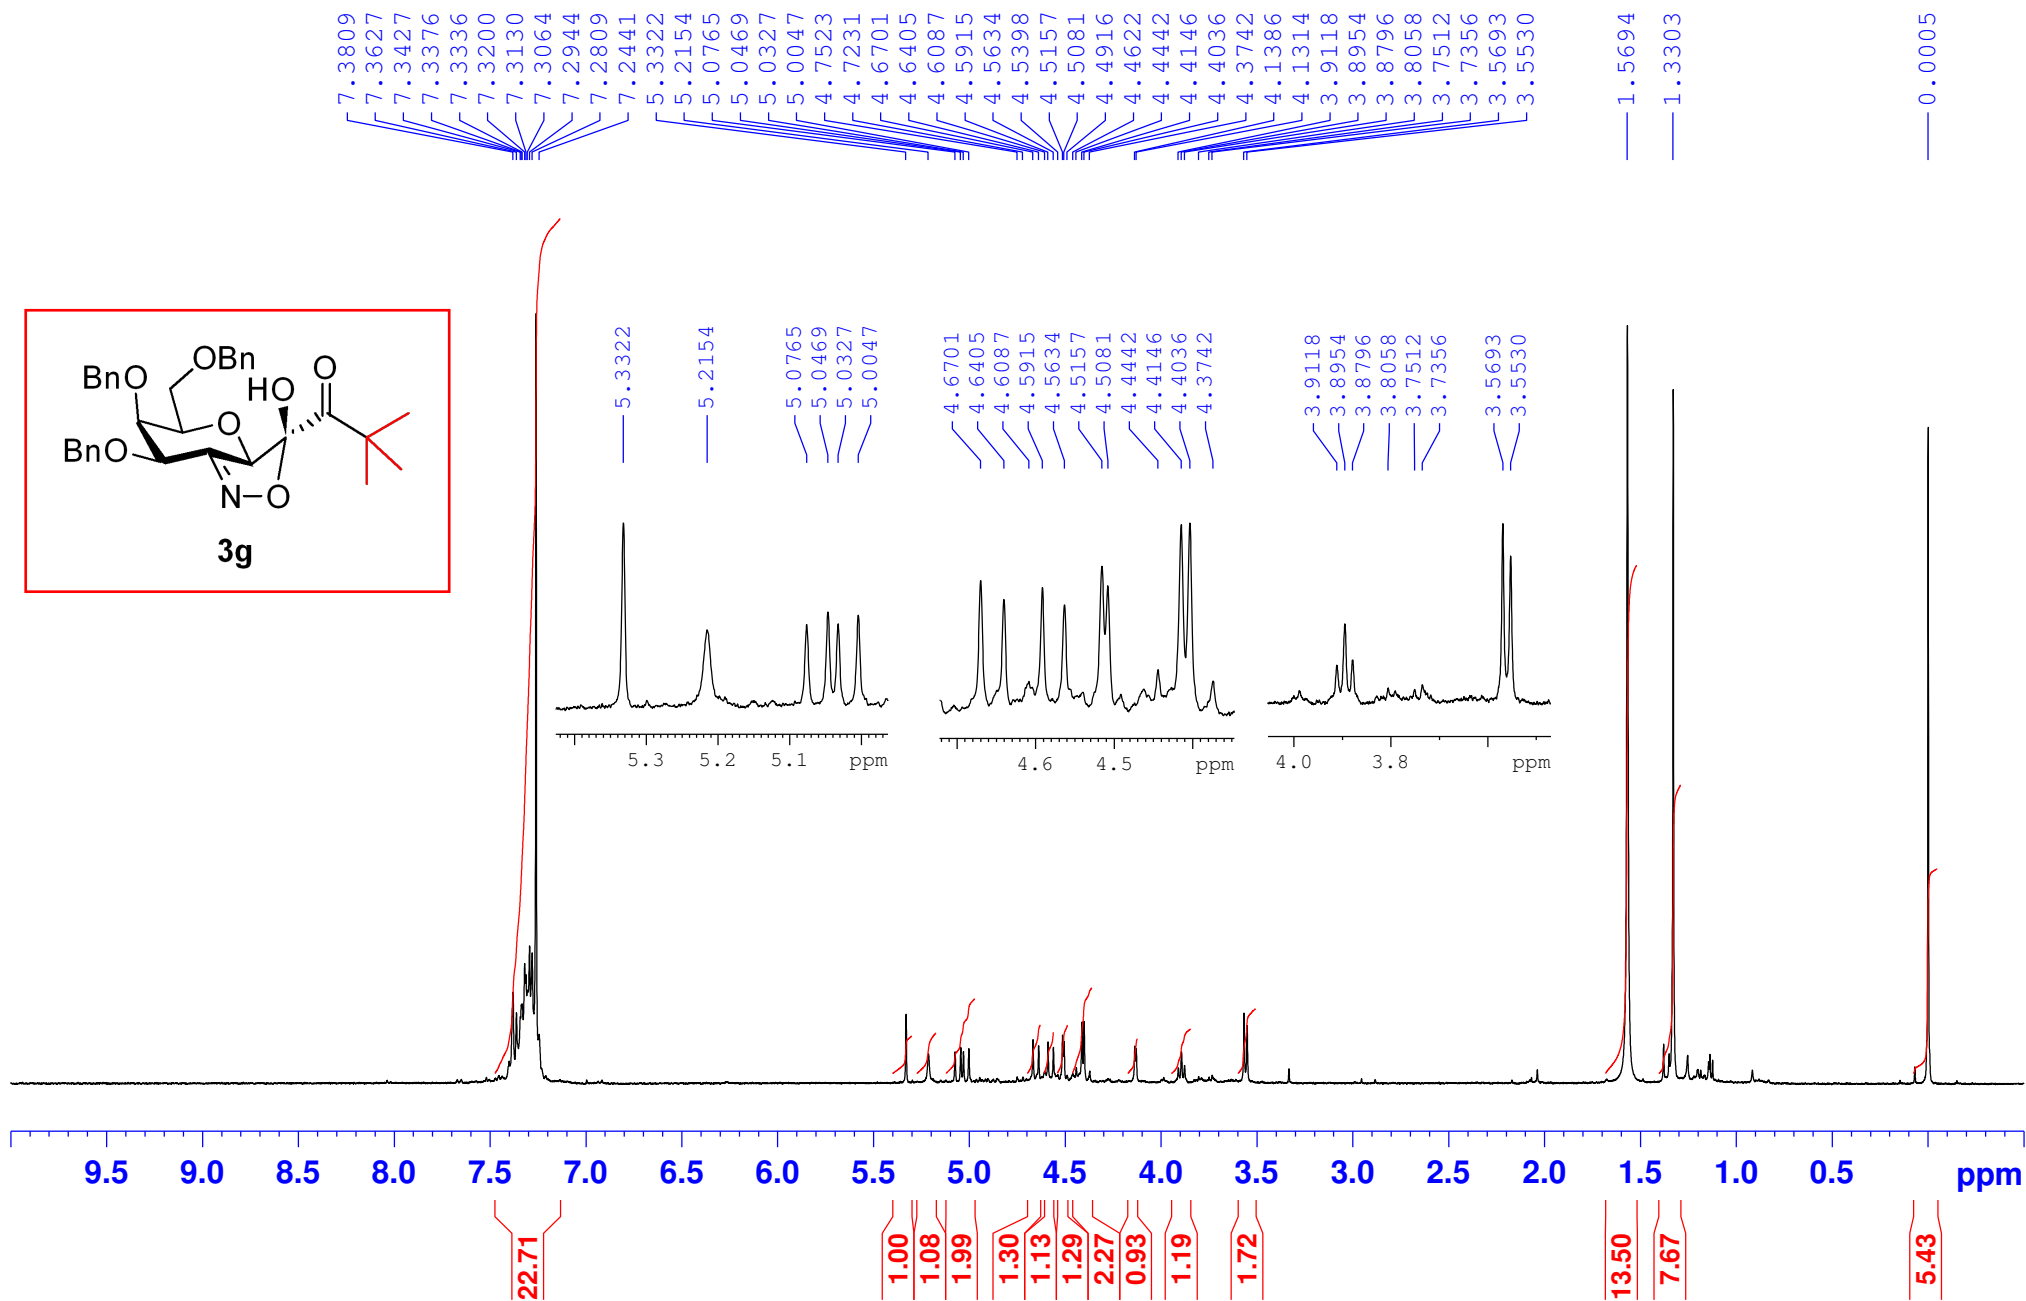

Compound 3g, <sup>13</sup>C NMR, CDCl<sub>3</sub>, 400 MHz

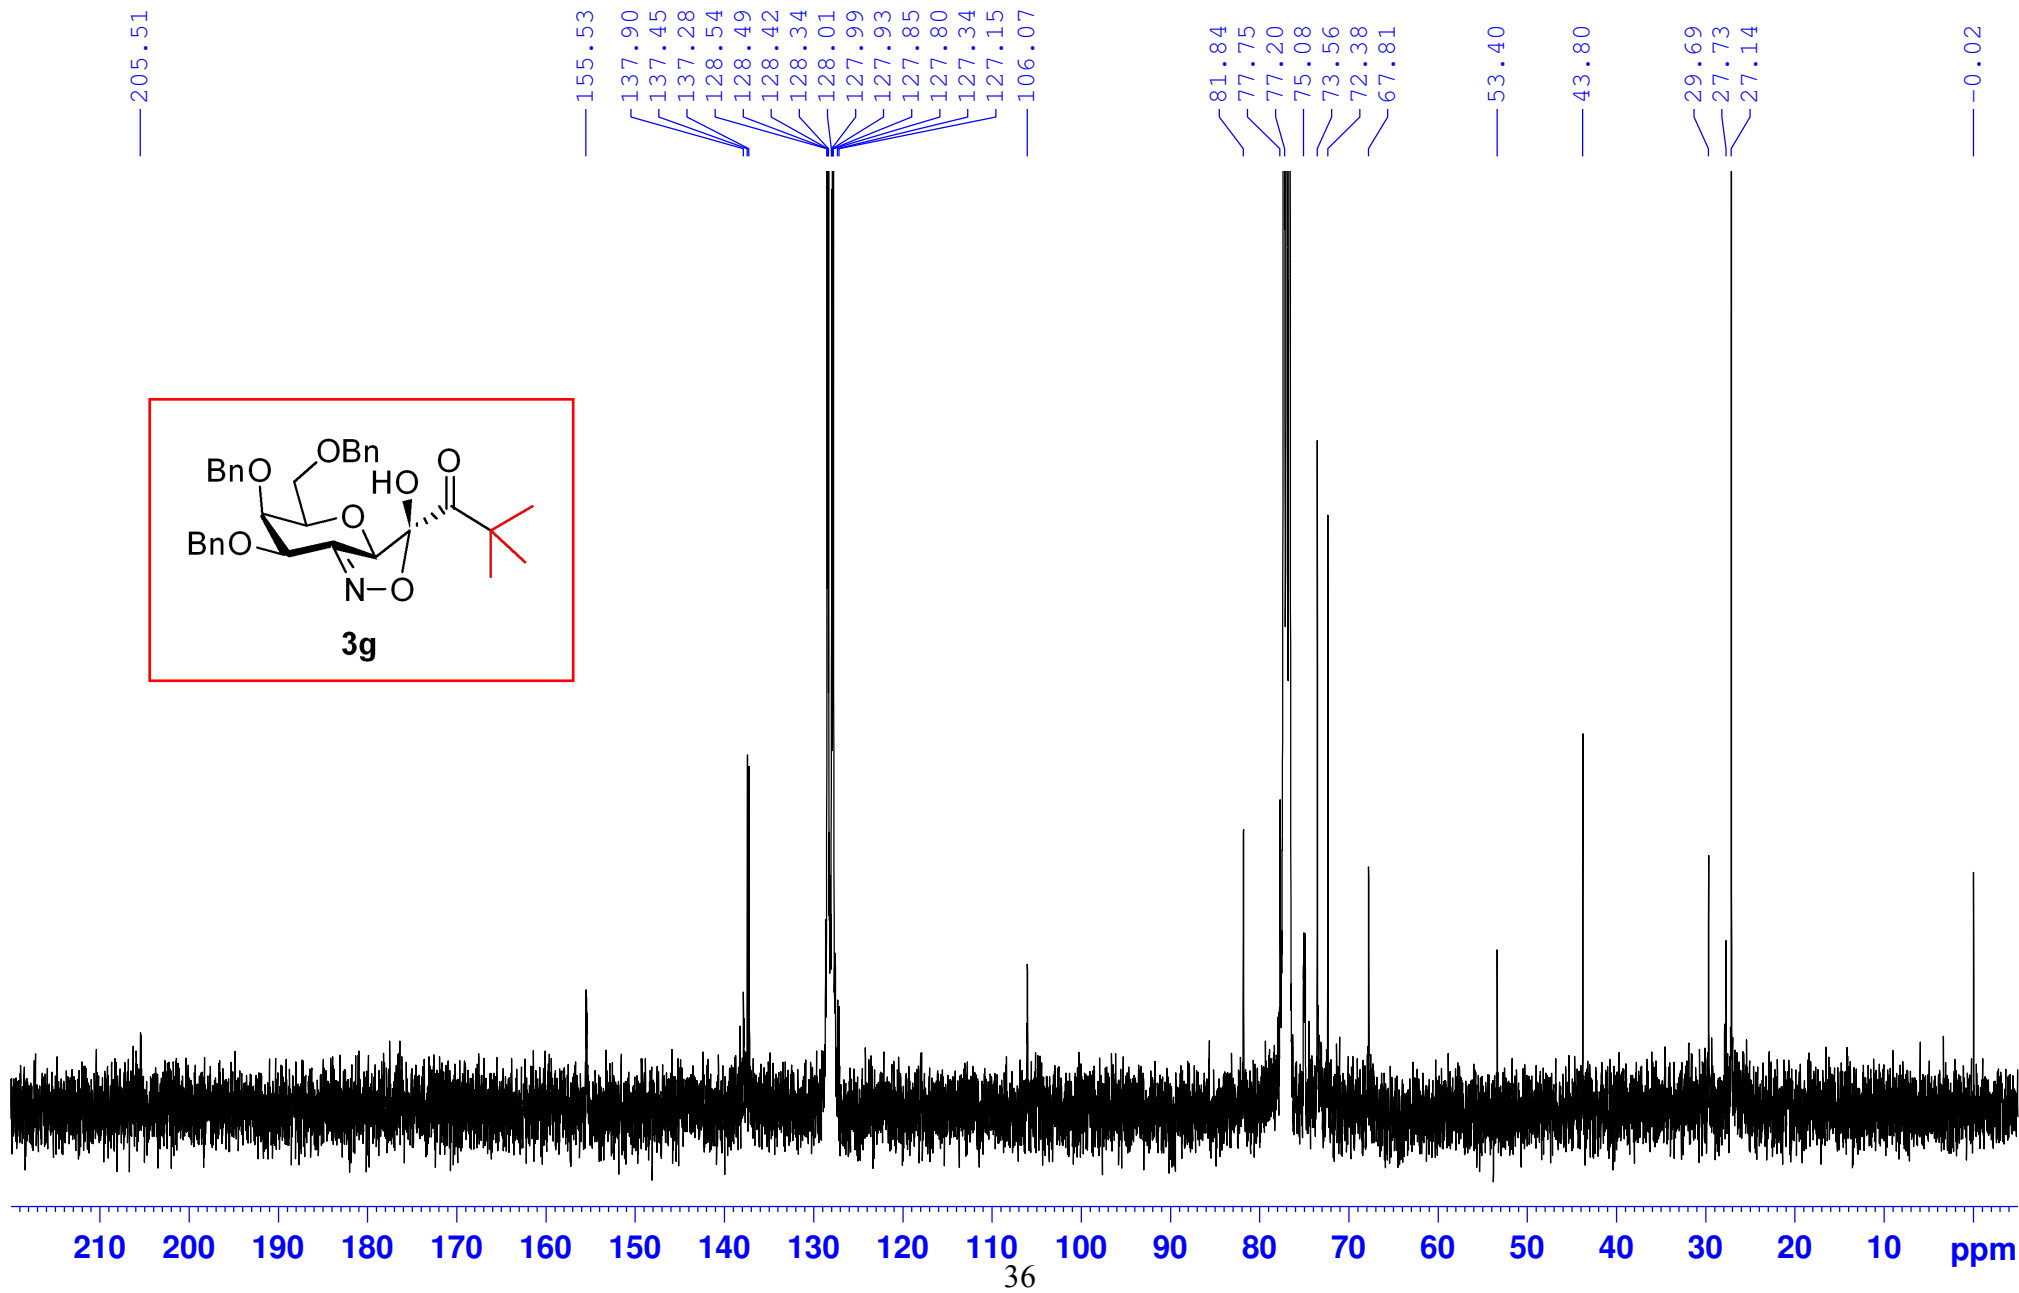

Compound 3h, <sup>1</sup>H NMR, 400 MHz, CDCl<sub>3</sub>

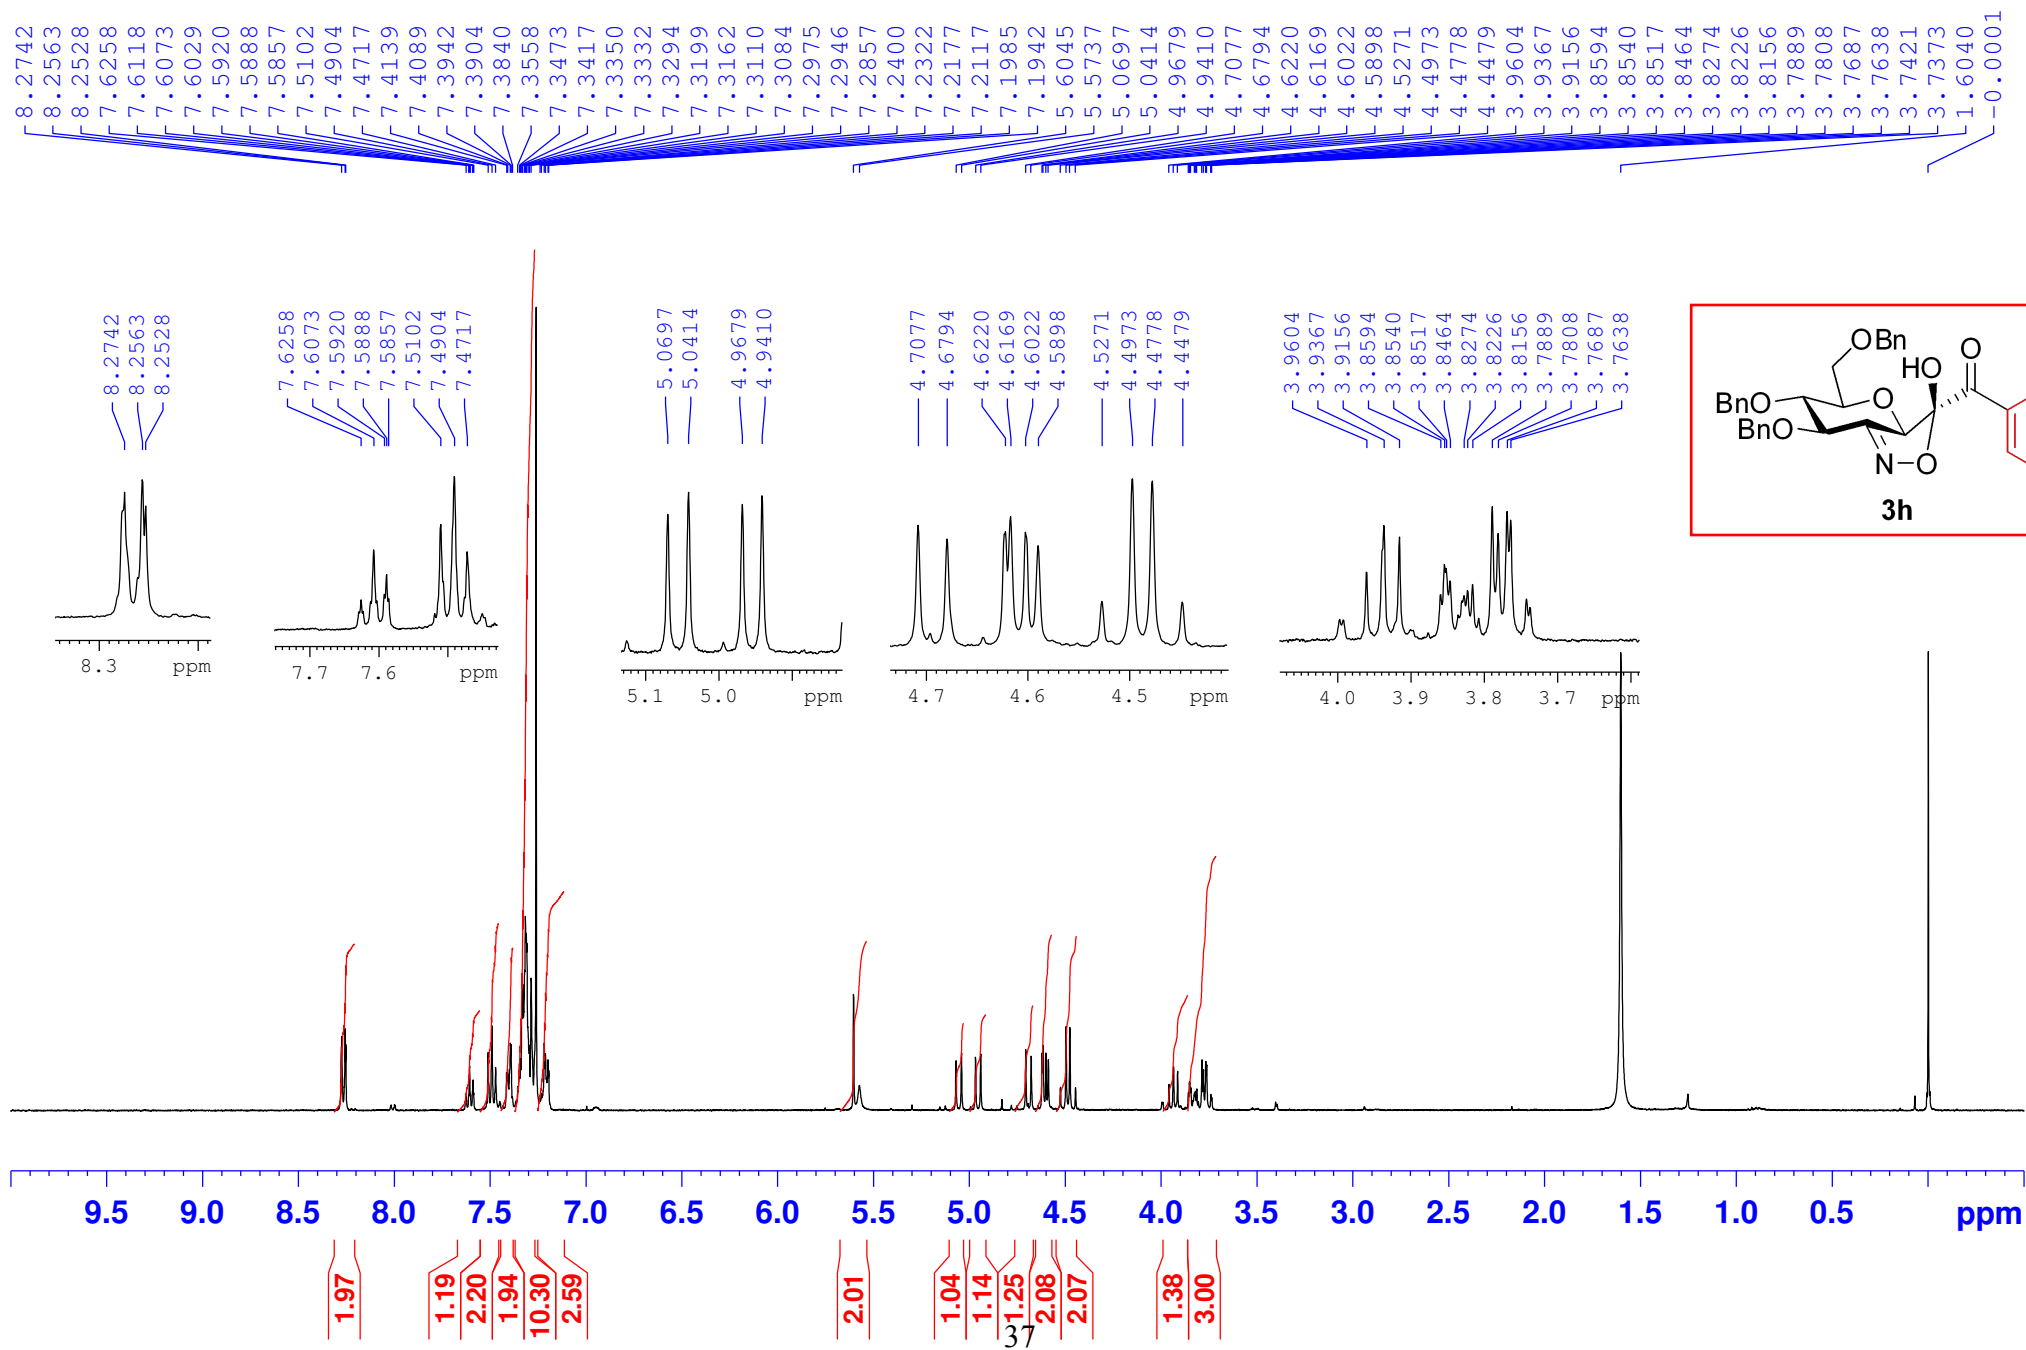

Compound 3h, <sup>13</sup>C NMR, 400 MHz, CDCl<sub>3</sub>

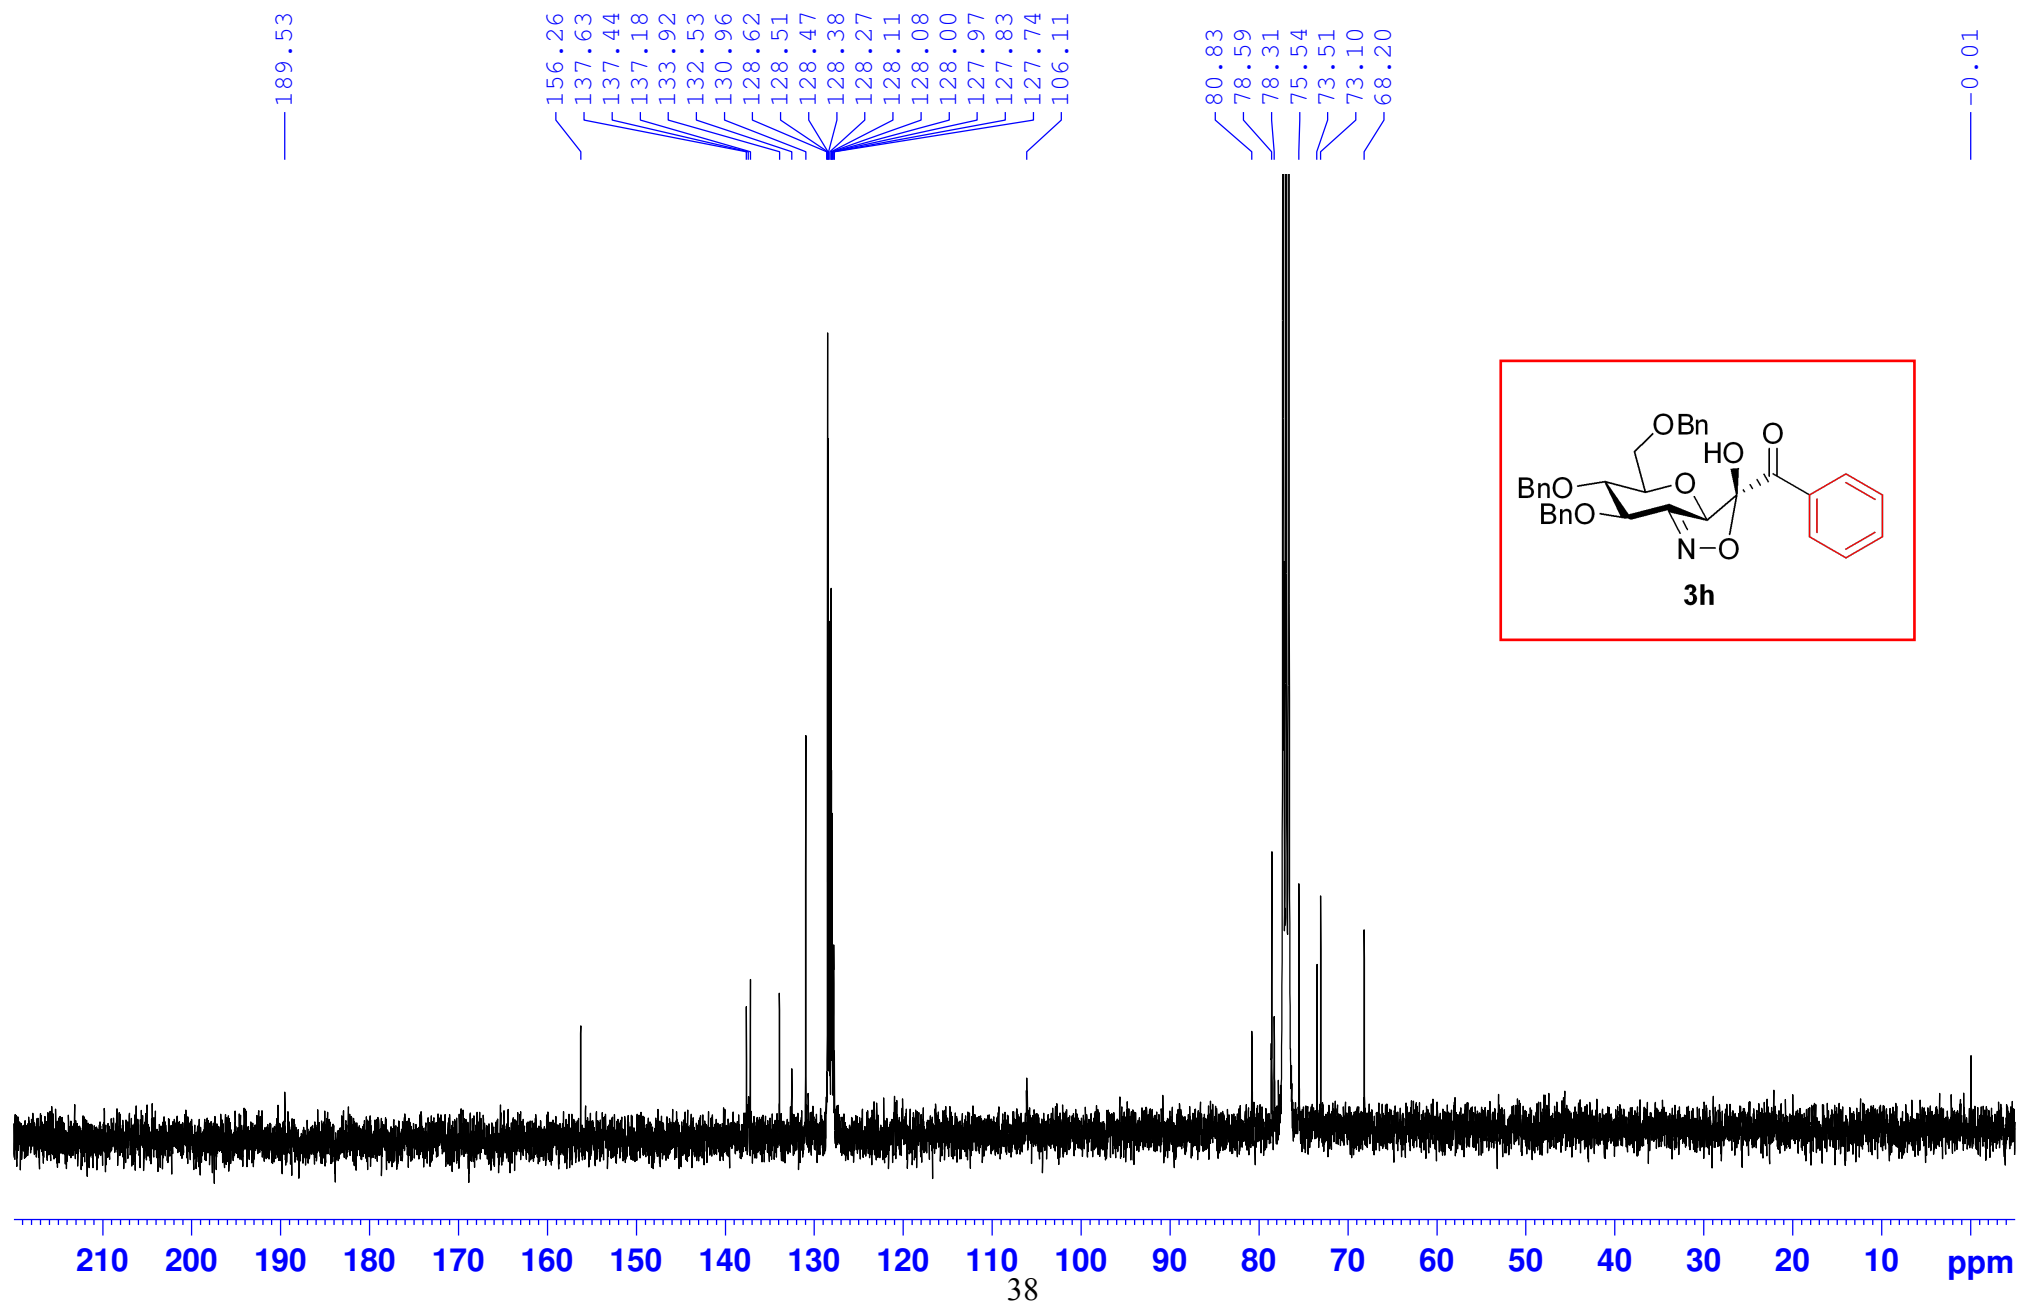

Compound 3i, 400 MHz, CDCl<sub>3</sub>, 1H NMR

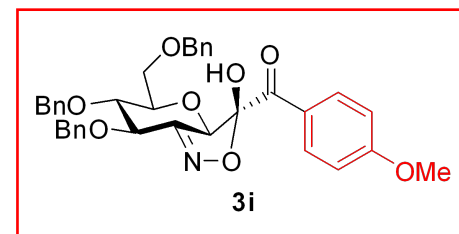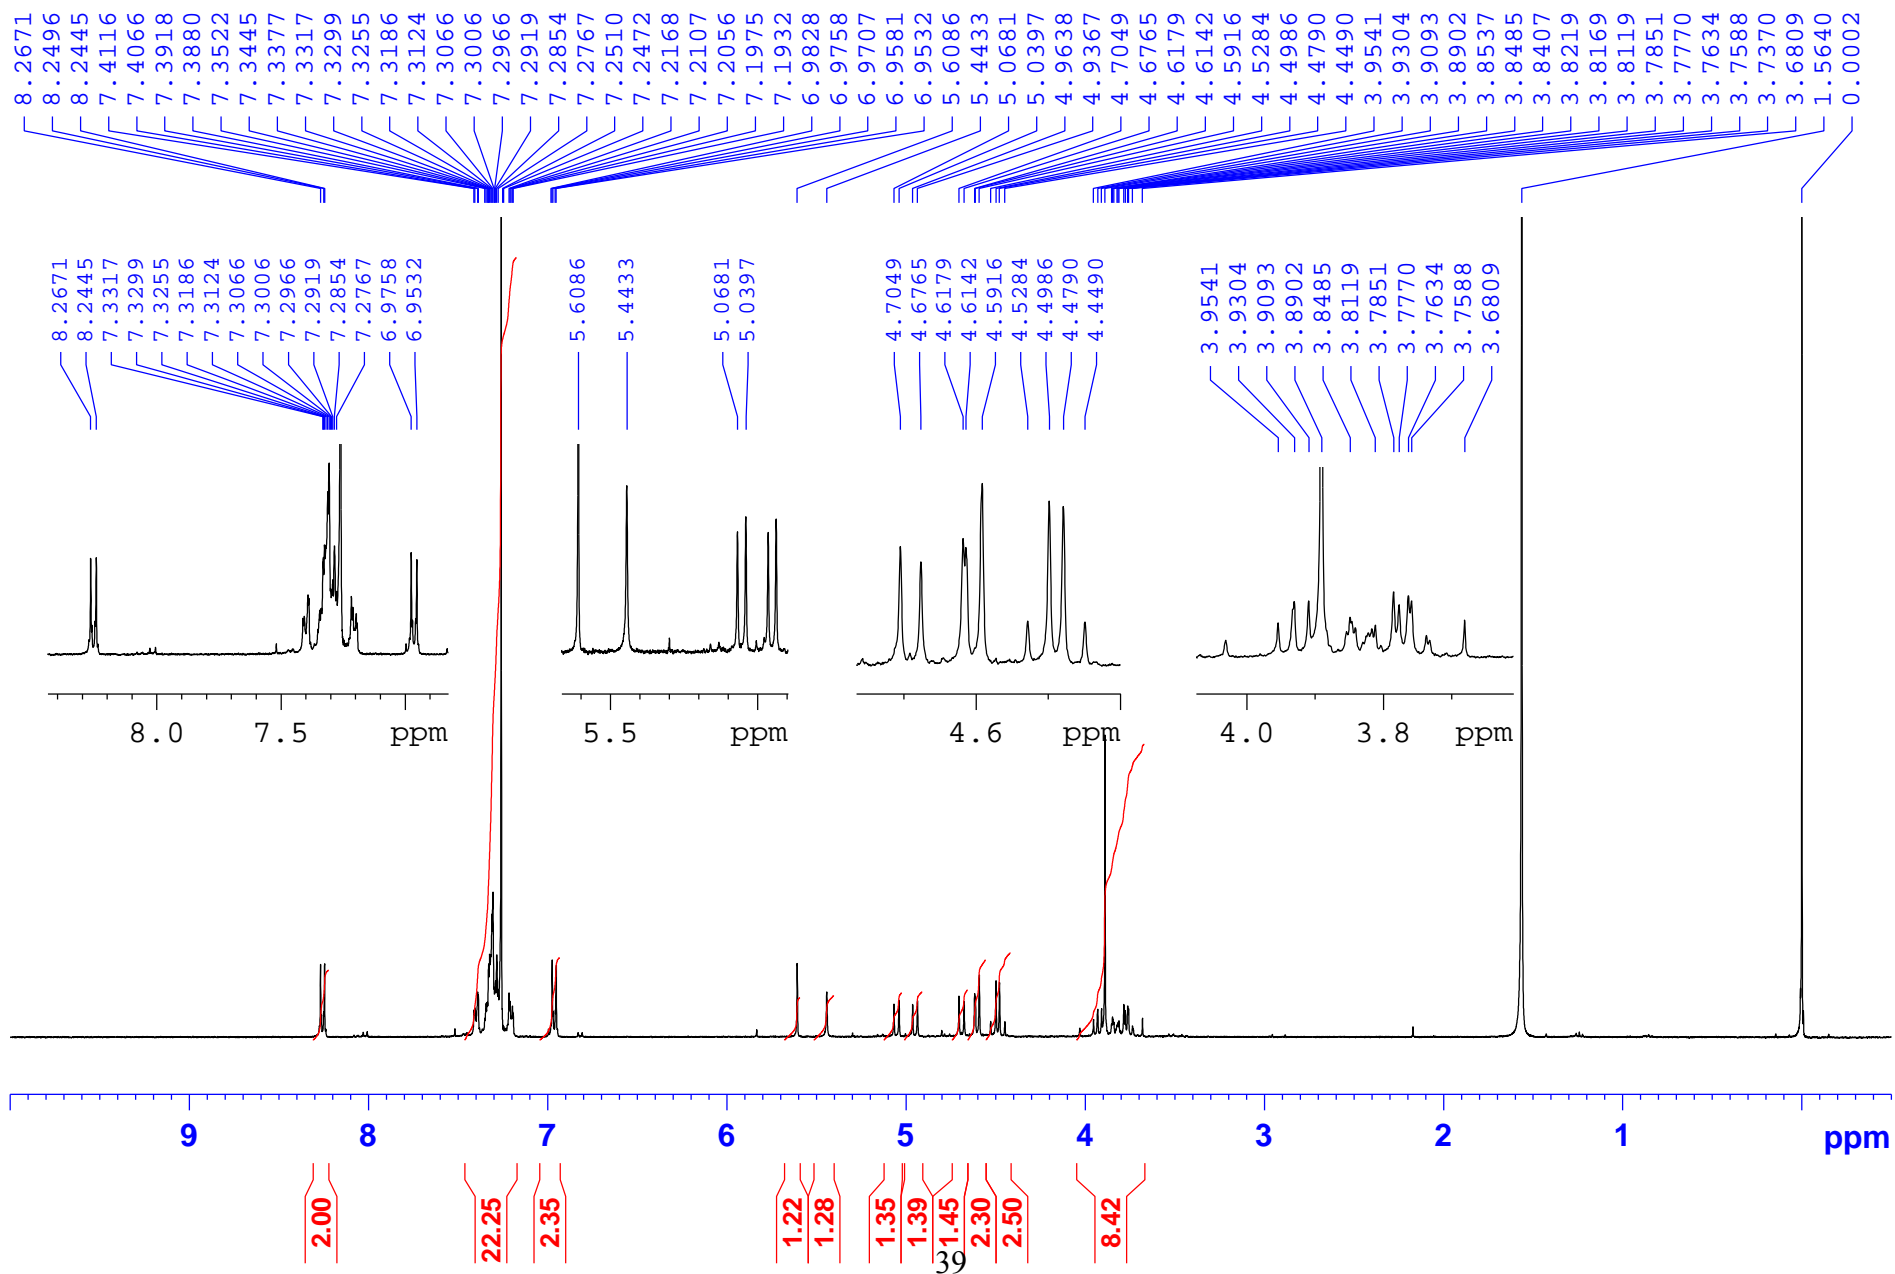

Compound 3i, <sup>13</sup>C NMR, 400MHz, CDCl<sub>3</sub>

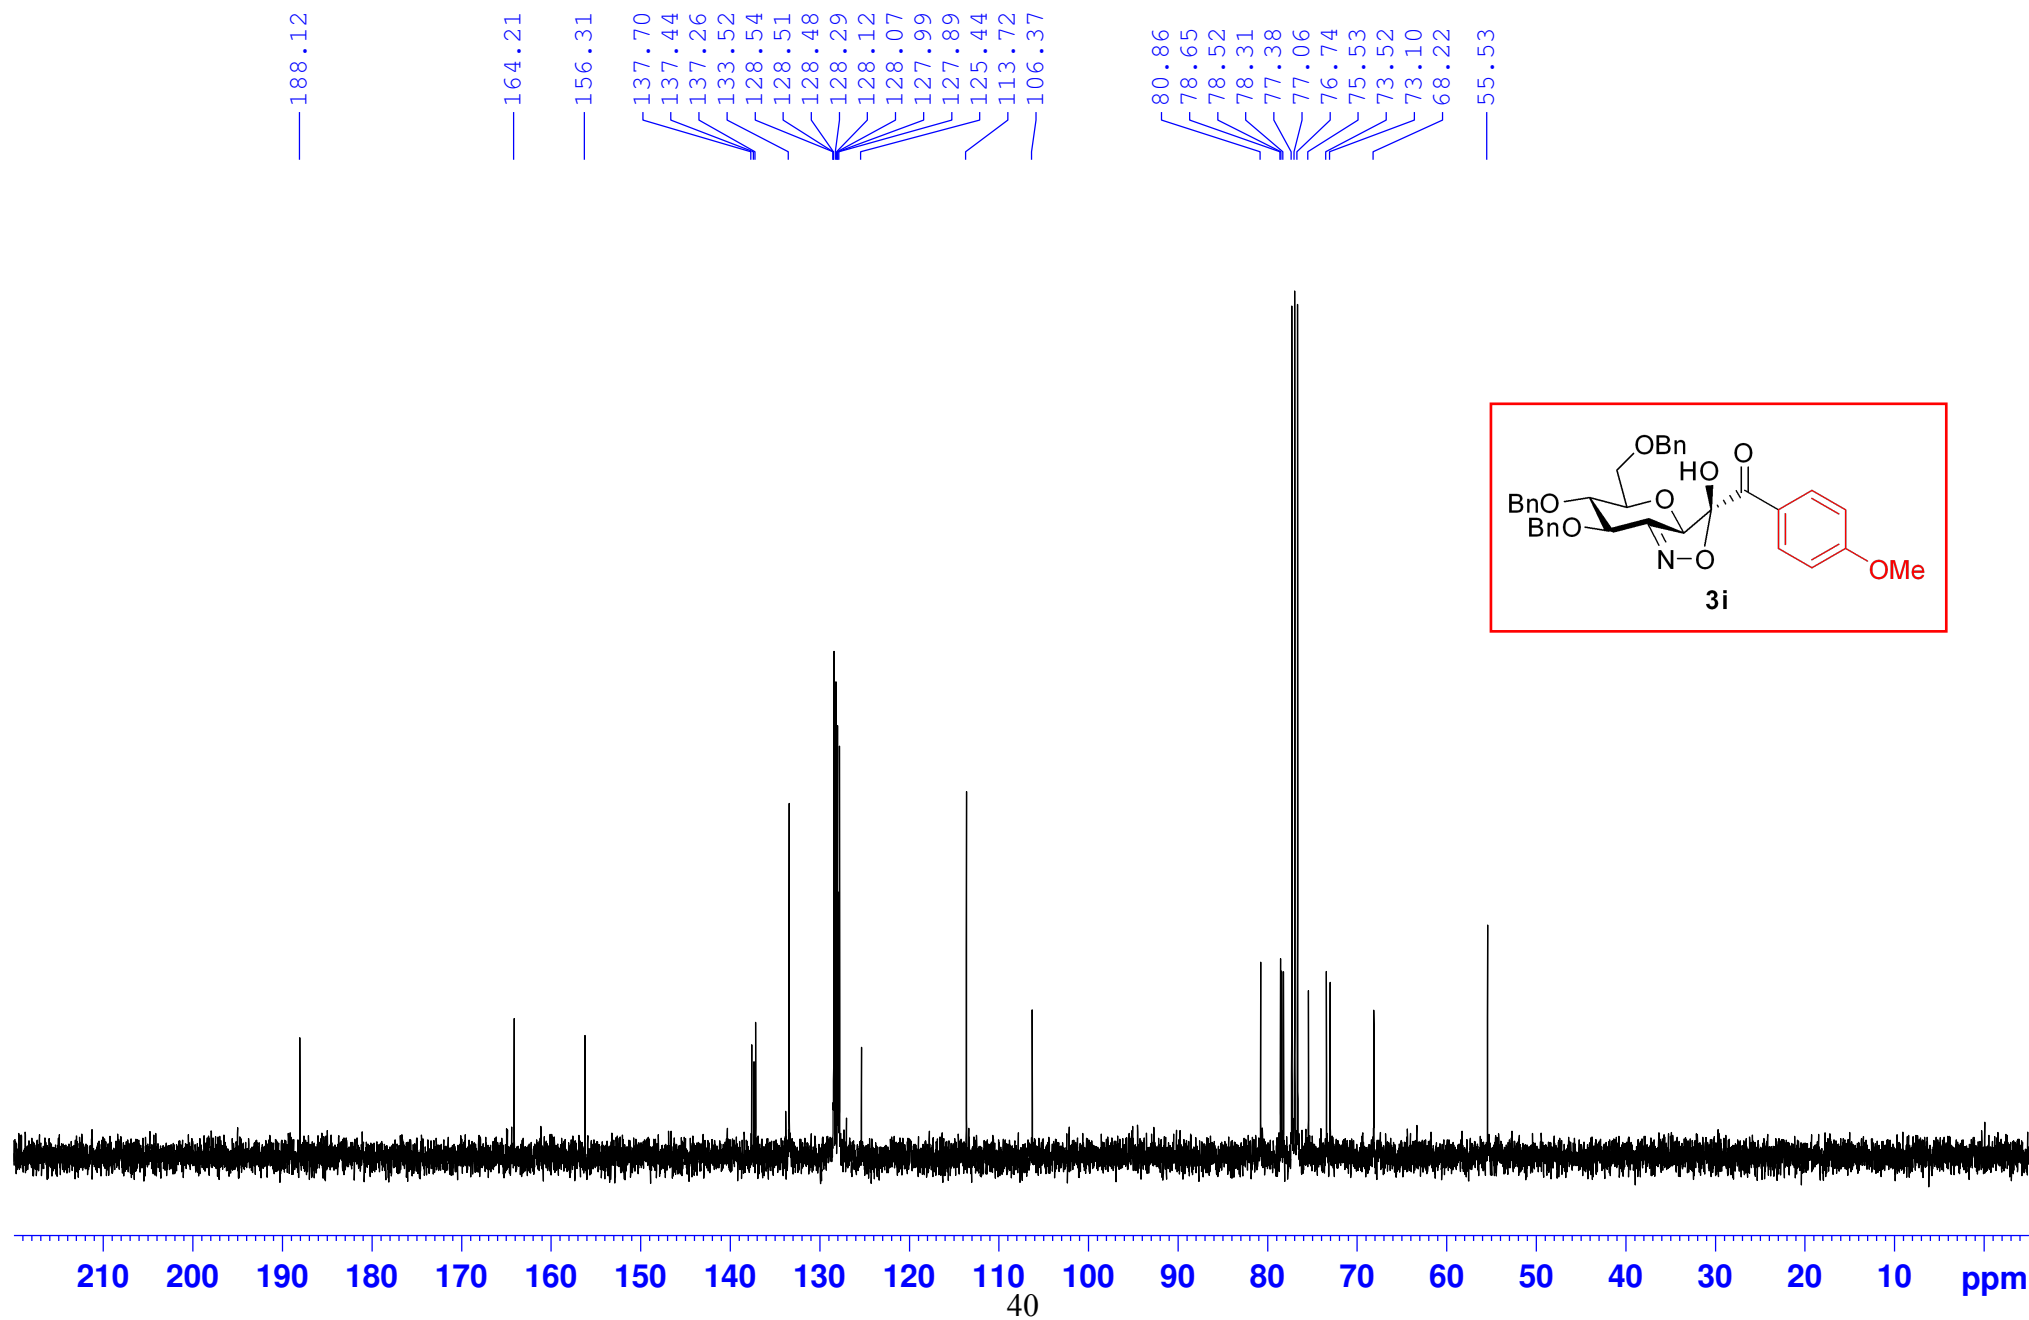



Compound 3j, <sup>1</sup>H NMR, 400MHz, CDCl<sub>3</sub>

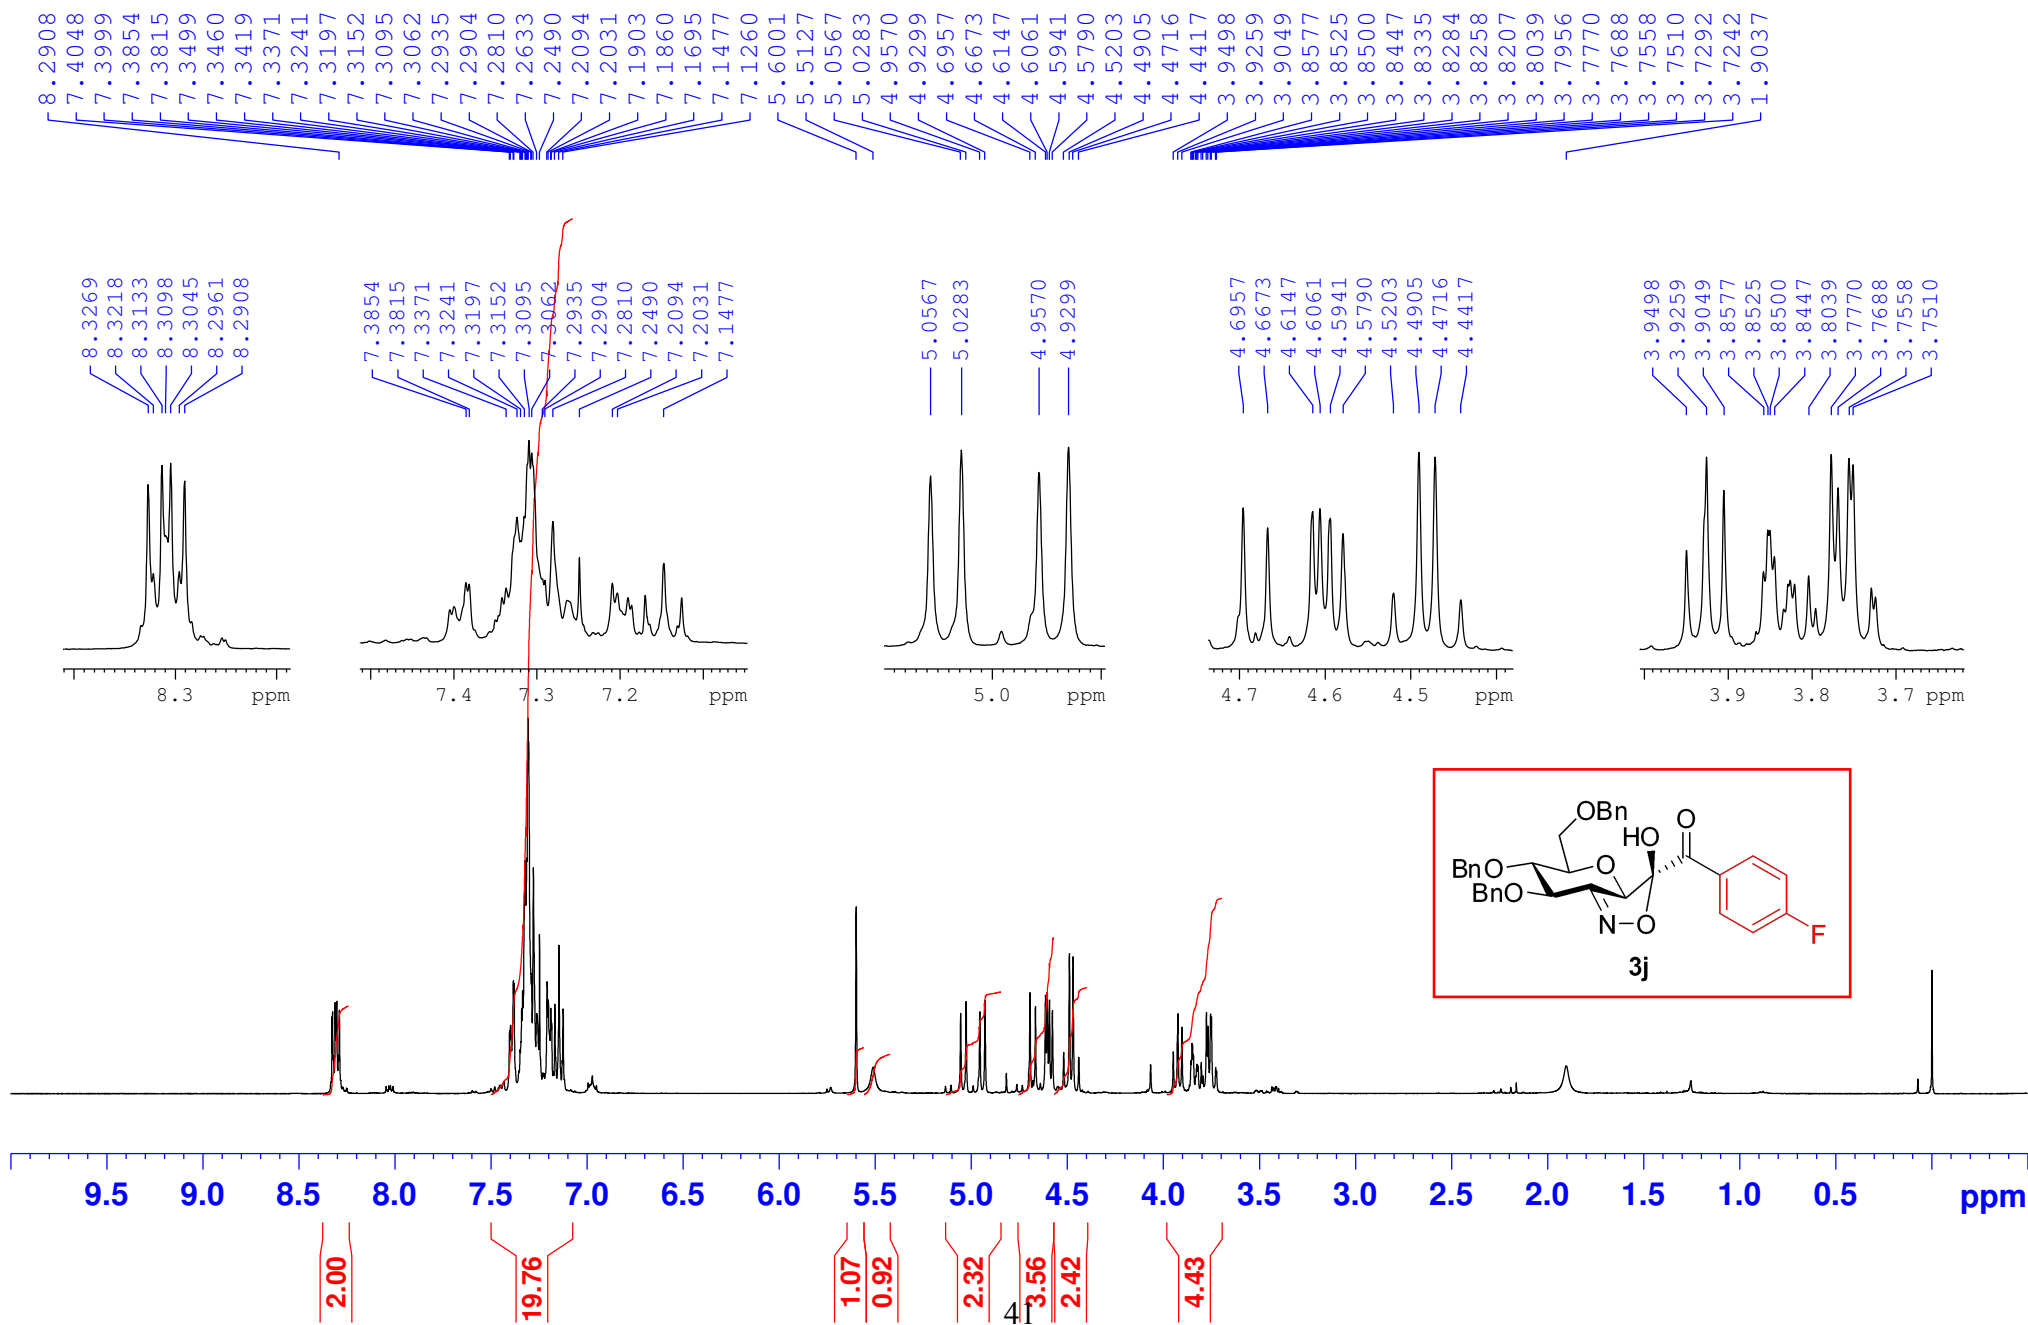

Compound 3j, <sup>13</sup>C NMR, 400MHz, CDCl<sub>3</sub>

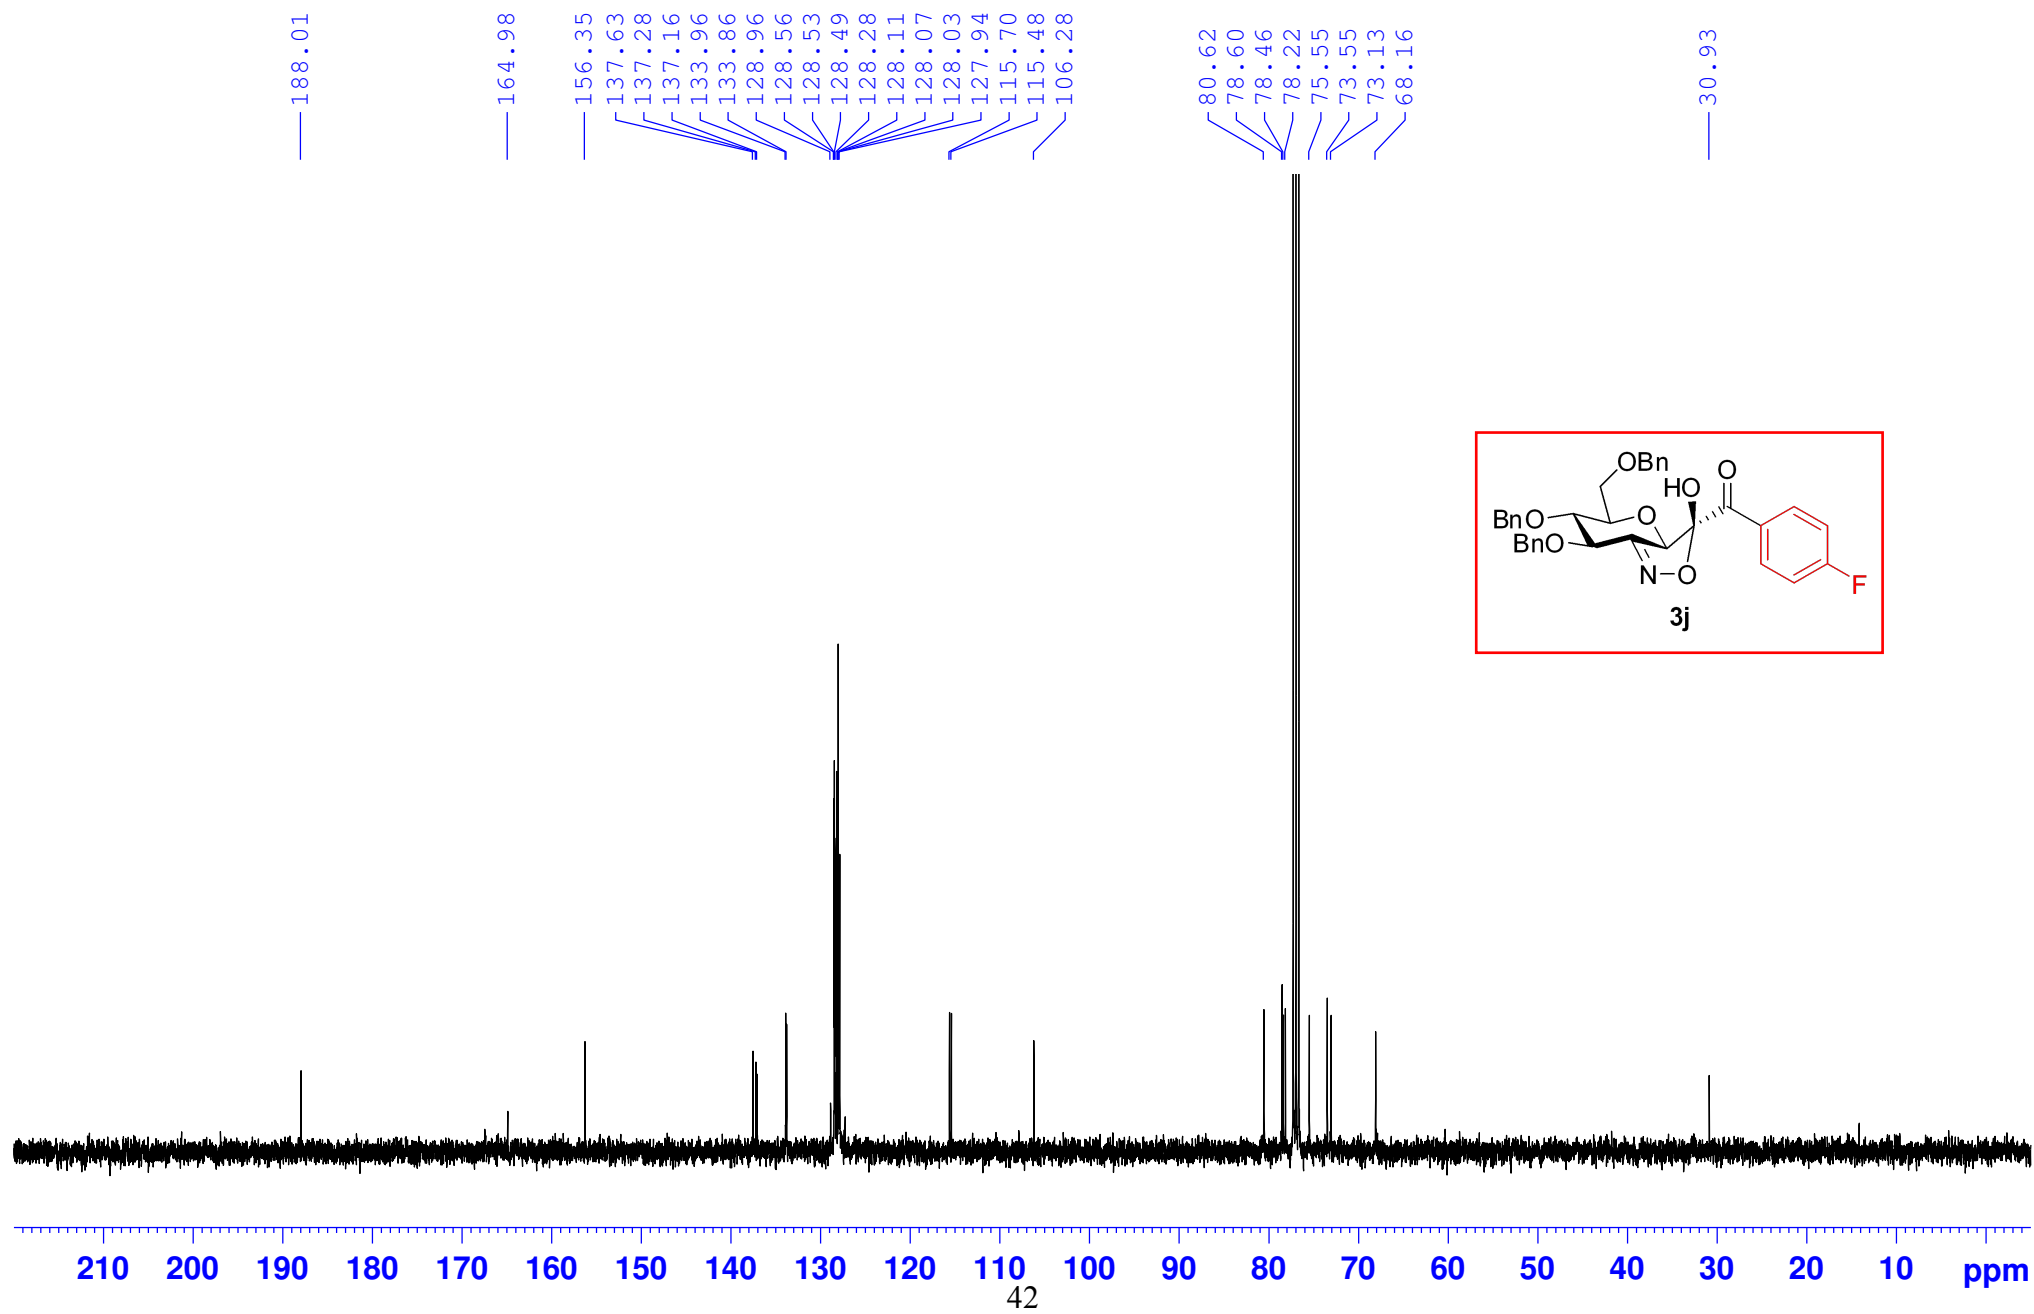

Compound 3k, 400 MHz, CDCl<sub>3</sub>, 1H NMR

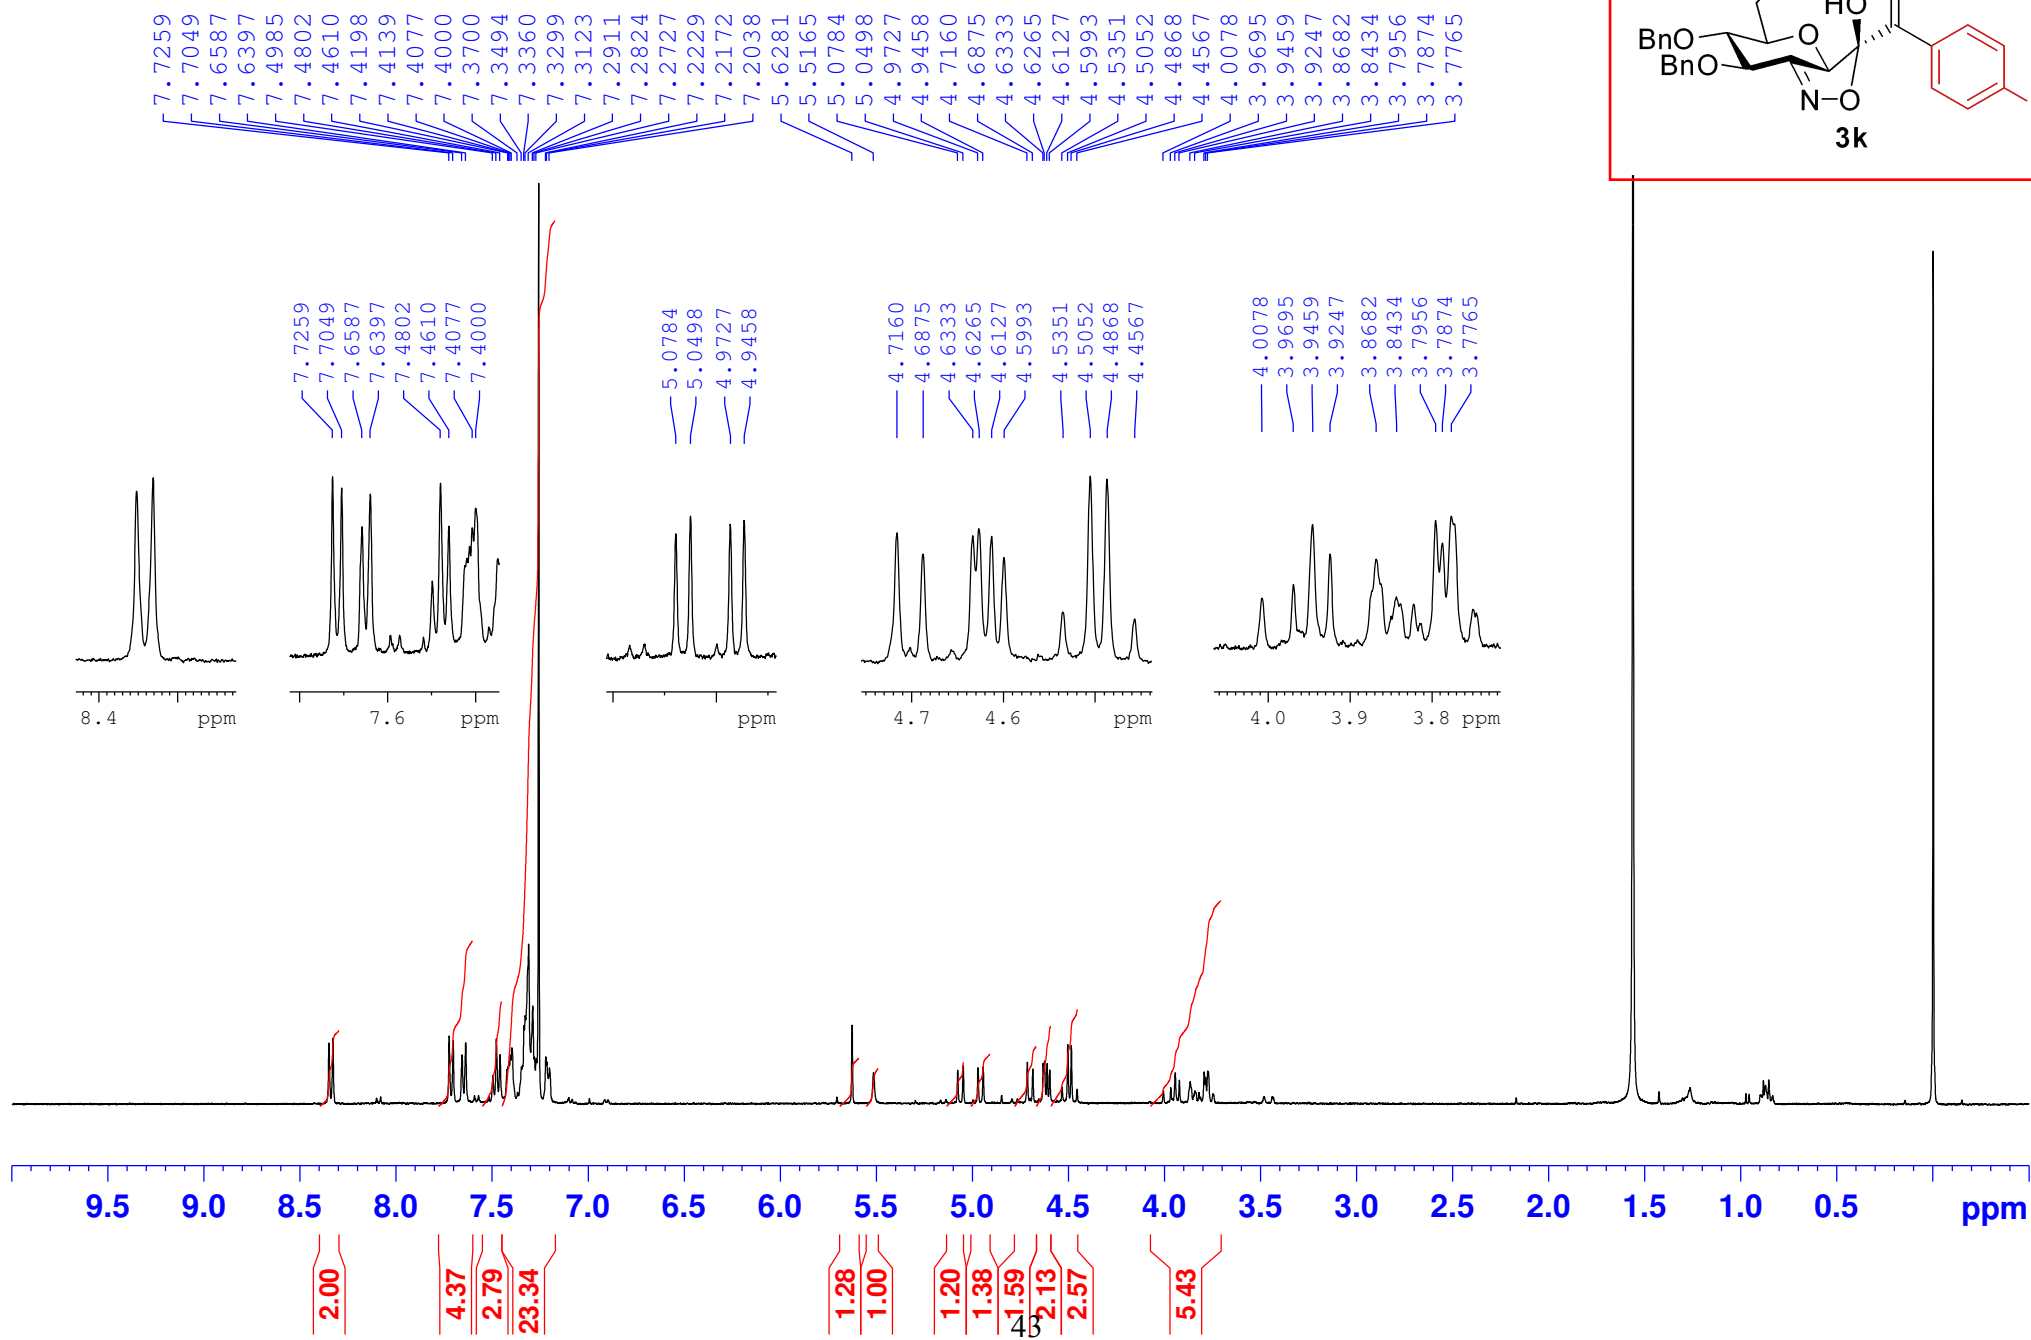

Compound 3k,  $^{13}\text{C}$  NMR, 400MHz,  $\text{CDCl}_3$

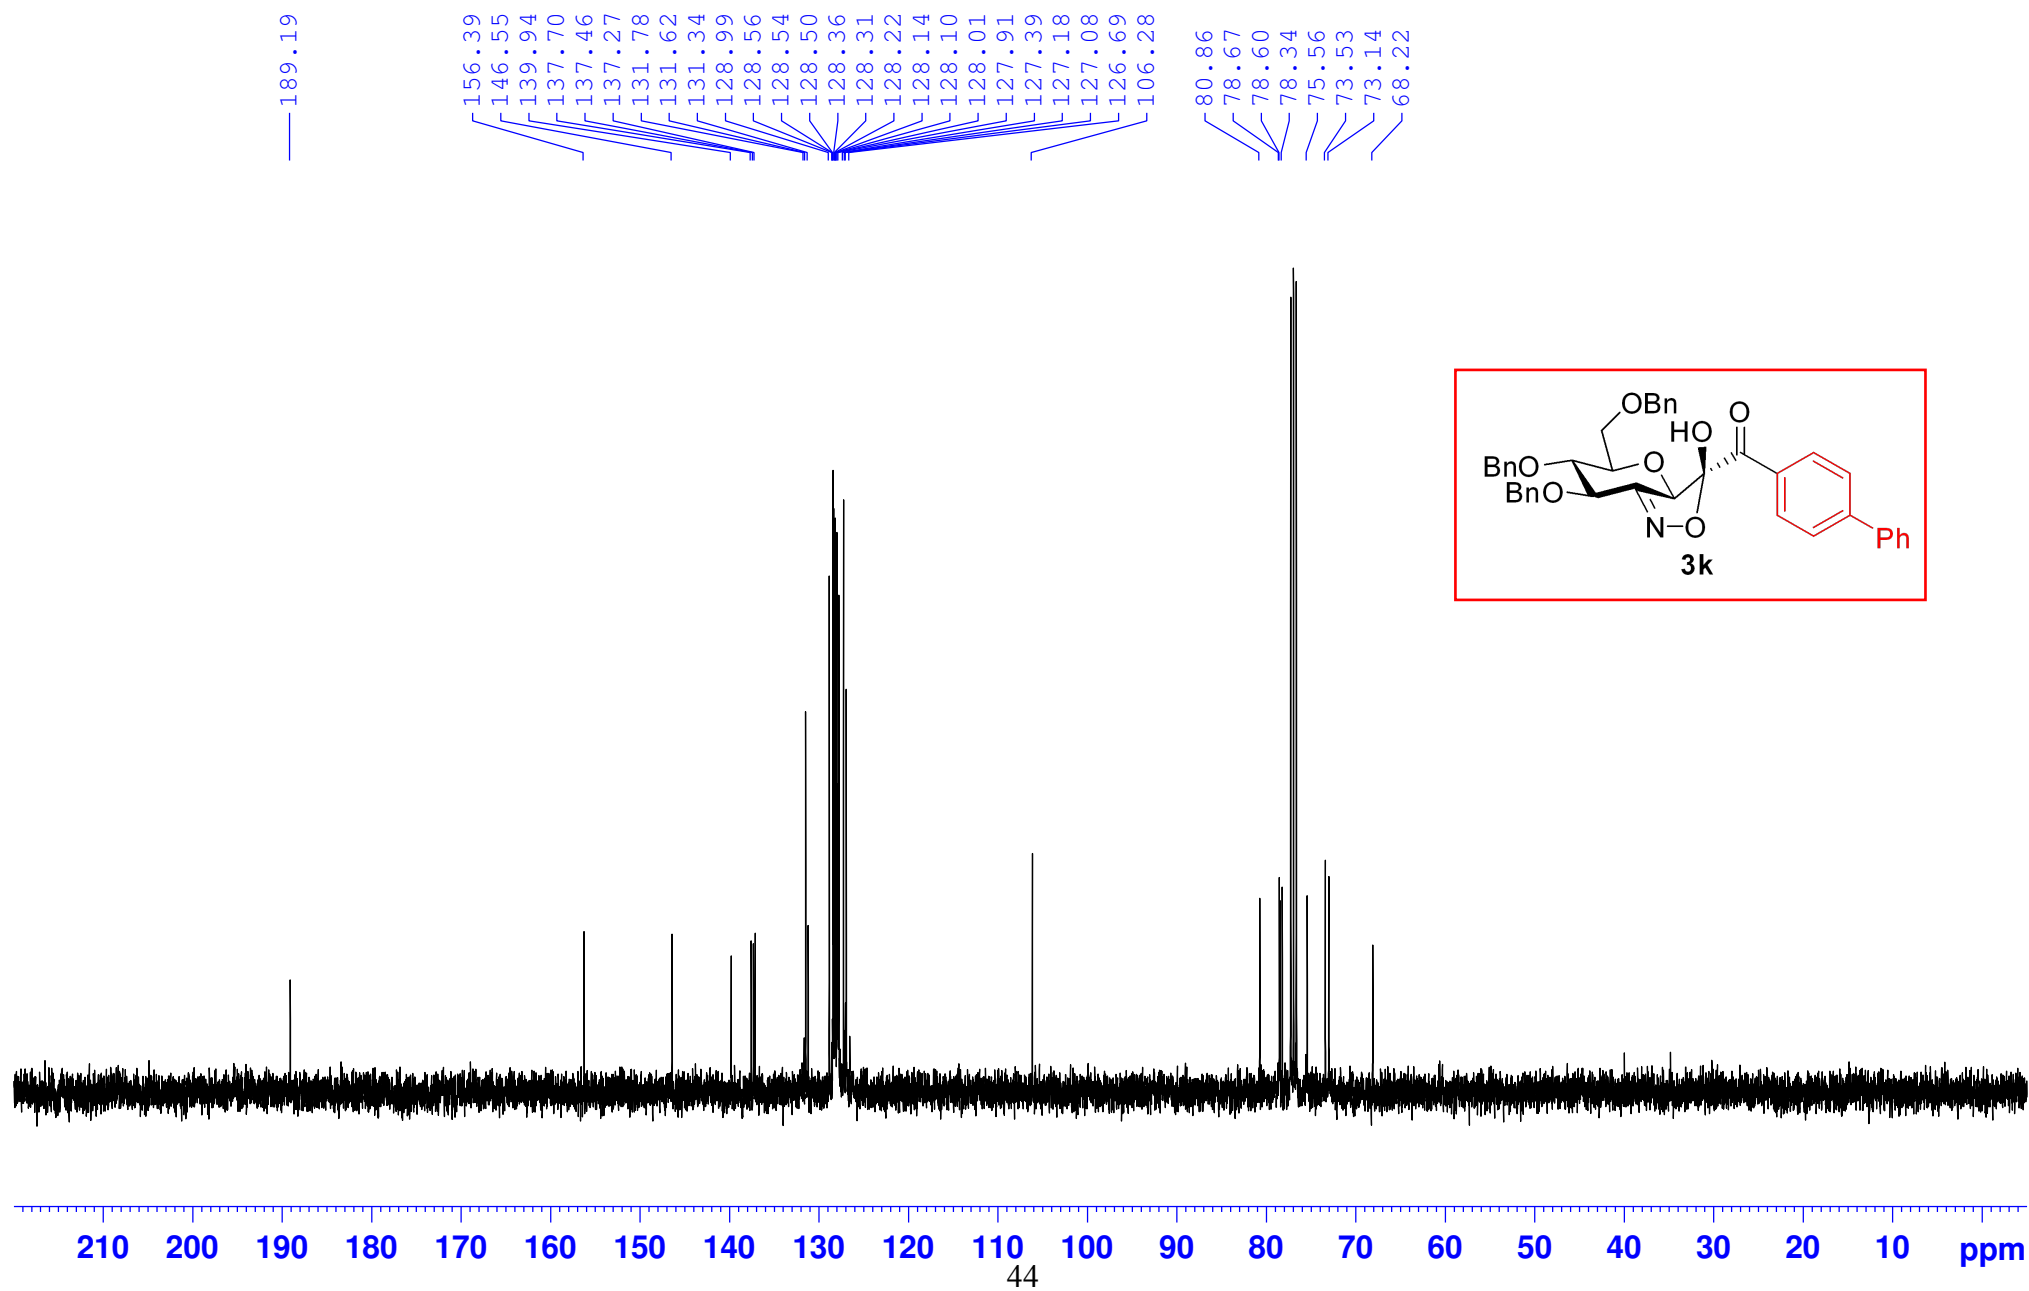

Compound 31, <sup>1</sup>H NMR, 400MHz, CDCl<sub>3</sub>

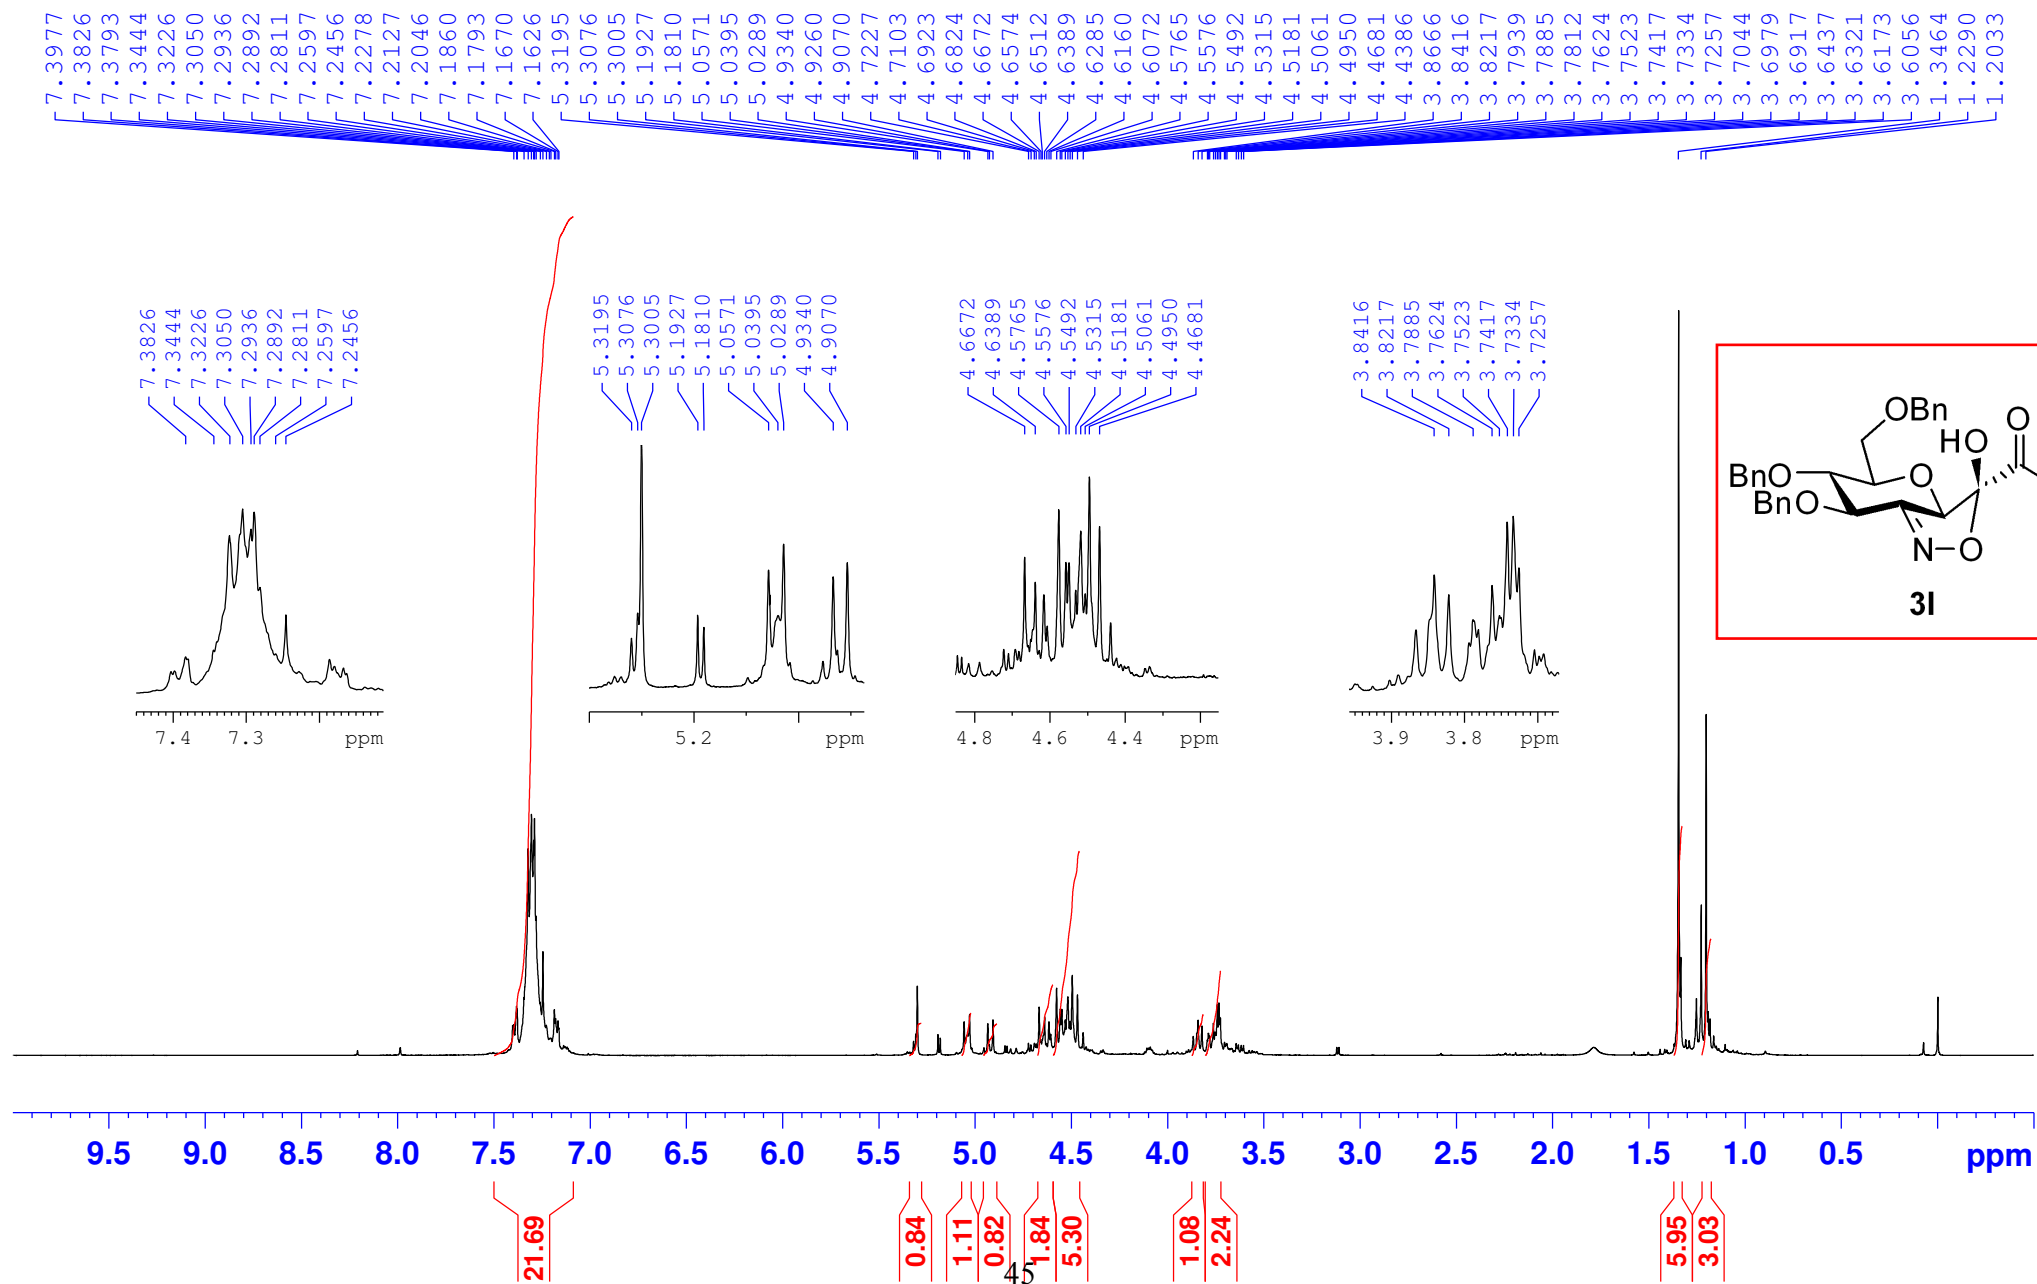

Compound 31, <sup>13</sup>C NMR, 400MHz, CDCl<sub>3</sub>

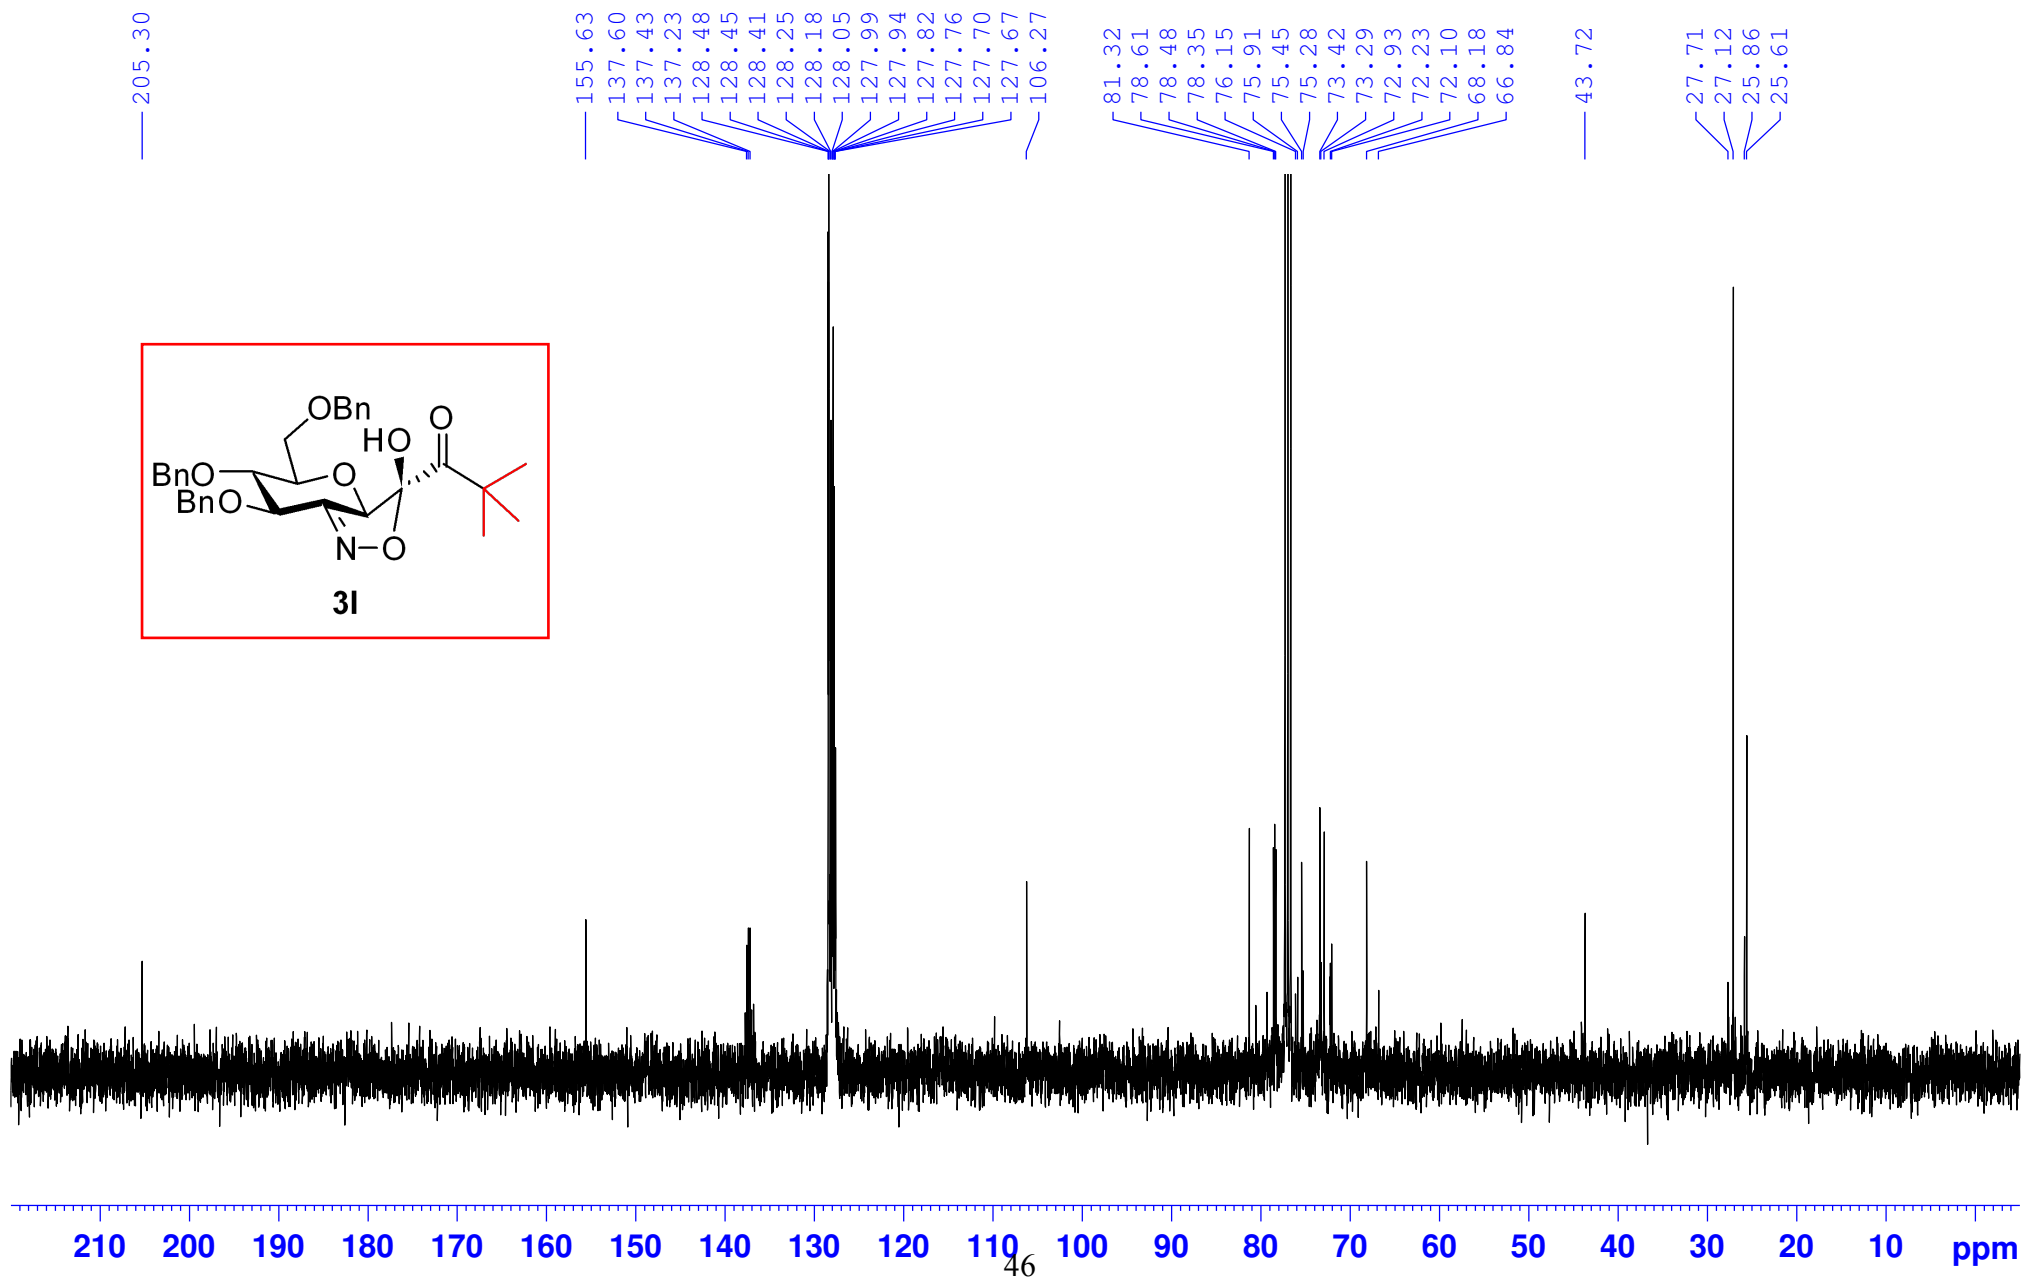

Supplement: c1cc12327k.pdf [file c1cc12327k.pdf]
